# Supplementary material for: Catalytic asymmetric hydrogenation of quinoline carbocycles: unusual chemoselectivity in the hydrogenation of quinolines
Source: Royal Society of Chemistry journal article supplement (doi:10.1039/c5cc01971k), 2015-01-01
Supplement: c5cc01971k1.pdf [file c5cc01971k1.pdf]

## Catalytic Asymmetric Hydrogenation of Quinoline Carbocycles: Unusual Chemoselectivity in Hydrogenation of Quinolines

Ryoichi Kuwano,<sup>\*,†,‡</sup> Ryuhei Ikeda,<sup>†</sup> and Kazuki Hirasada<sup>†</sup>

<sup>†</sup>*Department of Chemistry, Graduate School of Sciences, and International Research Center for Molecular Systems (IRCMS), Kyushu University, 6-10-1 Hakozaki, Higashi-ku, Fukuoka 812-8581, Japan*

<sup>‡</sup>*JST ACT-C, 6-10-1 Hakozaki, Higashi-ku, Fukuoka 812-8581, Japan*

### Electronic Supplementary Information

---

#### Table of Contents

|                                                                                                                        |     |
|------------------------------------------------------------------------------------------------------------------------|-----|
| General and Materials                                                                                                  | S2  |
| Preparation of Substrates <b>2</b>                                                                                     | S2  |
| Catalytic Asymmetric Hydrogenation of Quinolines <b>2</b>                                                              | S5  |
| Deprotection of <b>3j</b>                                                                                              | S14 |
| Mechanistic Studies on the Ruthenium-Catalyzed Hydrogenation of <b>2</b>                                               | S14 |
| References                                                                                                             | S16 |
| <sup>1</sup> H and <sup>13</sup> C { <sup>1</sup> H} NMR Spectra of Substrates <b>2</b>                                | S17 |
| <sup>1</sup> H and <sup>13</sup> C { <sup>1</sup> H} NMR Spectra of the Hydrogenation Products <b>3</b> and <b>4</b>   | S27 |
| <sup>1</sup> H and <sup>13</sup> C { <sup>1</sup> H} NMR Spectra of Compound <b>3q</b>                                 | S63 |
| <sup>1</sup> H and <sup>13</sup> C { <sup>1</sup> H} NMR Spectra of Compound <b>5k</b>                                 | S65 |
| <sup>1</sup> H NMR spectrum (CDCl <sub>3</sub> ) of <b>3i-d</b> , which was obtained from the deuteration of <b>2i</b> | S67 |
| Chiral HPLC Charts of the Hydrogenation Products                                                                       | S68 |

**General and Materials.** All NMR spectra were measured with Bruker AVANCE 400 or AVANCE III HD 400 Nanobay (9.4 T magnet) spectrometer at ambient temperature. In  $^1\text{H}$  NMR spectra, chemical shifts (ppm) referenced to internal tetramethylsilane (0.00 ppm in  $\text{CDCl}_3$ ). In  $^{13}\text{C}$  NMR spectra, chemical shifts (ppm) referenced to the carbon signal of the deuterated solvents (77.0 ppm in  $\text{CDCl}_3$ ). IR spectra and melting points were measured with JASCO FT/IR-4100 and Büchi Melting Point B-545, respectively. Elemental analyses and high-resolution mass spectra (FAB) were performed by Service Centre of Elementary Analysis of Organic Compounds and Network Joint Research Center for Materials and Devices (Institute for Materials Chemistry and Engineering, Kyushu University), respectively. Column chromatographies were performed with silica gel 60 (230–400 mesh, Merck).

Ethyl acetate ( $\text{EtOAc}$ ) was dried with phosphorus pentoxide. 2-Propanol ( $i\text{-PrOH}$ ), triethylamine ( $\text{Et}_3\text{N}$ ), and 1,8-diazabicyclo[5,4,0]undec-7-ene (DBU) were dried with calcium hydride. These solvents and reagents were distilled under nitrogen atmosphere. Dry  $N,N$ -dimethylformamide (DMF, Aldrich) was purchased. Toluene (Guaranteed Reagent) and tetrahydrofuran (THF) (HPLC grade, without inhibitor) were deoxidized by purging with nitrogen for 30 min and dried with an alumina and copper column system (GlassContour Co.).  $\text{Ru}(\eta^3\text{-methallyl})_2(\text{cod})$ ,<sup>1</sup> ( $S,S$ )-( $R,R$ )-PhTRAP (**1**),<sup>2</sup>  $\{\text{Ru}(p\text{-cymene})[(S,S)\text{-}(R,R)\text{-PhTRAP}]\}\text{Cl}$ ,<sup>3</sup> 8-phenylquinoline (**2k**),<sup>4</sup> 8-(trifluoromethanesulfoxy)quinoline,<sup>4</sup> and 8-phenyl-5,6,7,8-tetrahydroquinolin-8-ol<sup>5</sup> were prepared according to literature procedures. 2-Phenylquinoline (**2a**), methyl quinoline-6-carboxylate (**2b**), 6-isopropylquinoline (**2c**), 3-methoxyquinoline (**2d**), 4-methoxyquinoline (**2e**), 5-methoxyquinoline (**2f**), 6-methoxyquinoline (**2g**), 7-methoxyquinoline (**2h**), 8-methoxyquinoline (**2i**), 8-methylquinoline (**2o**), 8-hydroxyquinoline, dry sodium hydride, (triisopropylsilyloxy)methyl chloride, 4-methoxyphenylboronic acid, lithium chloride, tetrakis(triphenylphosphine)palladium(0) [ $\text{Pd}(\text{PPh}_3)_4$ ], 4-(trifluoromethyl)phenylboronic acid, 2-methylphenylboronic acid, sodium carbonate ( $\text{Na}_2\text{CO}_3$ ), palladium(II) acetate [ $\text{Pd}(\text{OAc})_2$ ], 1,1'-bis(diphenylphosphino)ferrocene (DPPF), 0.5  $M$  solution of cyclohexylzinc bromide in THF, 1.0  $M$  solution of tetrabutylammonium fluoride (TBAF) in THF, acetic acid ( $\text{AcOH}$ ), and methanesulfonic acid ( $\text{MsOH}$ ) were purchased and used without further purification.

## Preparation of Substrates 2

### 8-[(Triisopropylsilyloxy)methoxy]quinoline (**2j**).

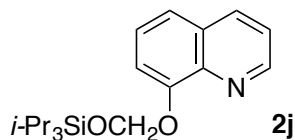

8-Hydroxyquinoline (726 mg, 5.0 mmol) was placed in a three-neck flask, which was equipped with a stirring bar, rubber septum, three-way stopcock, and dropping funnel having a rubber septum. In the dropping funnel, dry sodium hydride (138 mg, 5.8 mmol) and a stirring bar were placed. After the reaction vessel was evacuated and charged with nitrogen gas three times, dry DMF (12 mL  $\times$  2) was added into the flask and dropping funnel. After the flask was immersed in an ice-bath, the suspension of NaH was added dropwise to the solution of 8-hydroxyquinoline at  $0^\circ\text{C}$  for 20 min. To the resulting

solution was added (triisopropylsilyloxy)methyl chloride (1.4 mL, *d* 0.96 g/mL, 6.0 mmol) with a syringe through the septum. The reaction mixture was stirred at 0°C for 5 min and at ambient temperature for 12 h. After water was added, the resulting mixture was extracted three times with Et<sub>2</sub>O. The combined organic layer was dried over Na<sub>2</sub>SO<sub>4</sub>, and then evaporated under reduced pressure after filtration. The residue was purified with a flash column chromatography on silica gel (EtOAc/hexane = 1/3) to give **2j** (1.40 g, 84%) as colorless oil: <sup>1</sup>H NMR (400 MHz, CDCl<sub>3</sub>, TMS) δ 1.07 (d, *J* = 7.3 Hz, 18H), 1.20 (septet, *J* = 7.3 Hz, 3H), 5.75 (s, 2H), 7.38 (dd, *J* = 4.2, 8.3 Hz, 1H), 7.40–7.49 (m, 2H), 7.52 (dd, *J* = 1.7, 7.5 Hz, 1H), 8.10 (dd, *J* = 1.5, 8.1 Hz, 1H), 8.93 (dd, *J* = 1.7, 4.3 Hz, 1H); <sup>13</sup>C {<sup>1</sup>H} NMR (100 MHz, CDCl<sub>3</sub>) δ 11.8, 17.7, 88.6, 112.3, 120.4, 121.3, 126.6, 129.3, 135.7, 140.3, 149.2, 153.6; IR (neat) 2946, 2867, 1496, 1467, 1378, 1250, 1158, 1064, 984, 789, 755 cm<sup>-1</sup>; Anal. Calcd for C<sub>19</sub>H<sub>29</sub>NO<sub>2</sub>Si: C, 68.83; H, 8.82; N, 4.22. Found: C, 68.70; H, 8.84; N, 4.09.

#### 8-(4-Methoxyphenyl)quinoline [57479-35-3] (**2l**).<sup>6</sup>

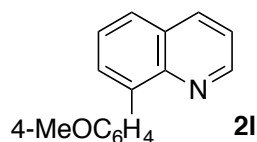

8-(Trifluoromethanesulfoxy)quinoline (1.39 g, 5.0 mmol), 4-methoxyphenylboronic acid (790 mg, 5.2 mmol), lithium chloride (636 mg, 15 mmol), and Pd(PPh<sub>3</sub>)<sub>4</sub> (289 mg, 0.25 mmol) were placed in a 50 mL two-neck flask, which was equipped with a stirring bar, rubber septum, and Dimroth condenser having a three-way stopcock. After the reaction vessel was evacuated and charged with nitrogen gas three times, dry toluene (18 mL) and freshly prepared 1 *M* aqueous solution of Na<sub>2</sub>CO<sub>3</sub> (3.2 mL, 3.2 mmol) were added into the flask, and then the resulting mixture was stirred under reflux for 60 h. After cooled to ambient temperature, the mixture was washed with water. The aqueous layer was extracted three times with EtOAc. The combined organic layer was dried over Na<sub>2</sub>SO<sub>4</sub>, and then evaporated under reduced pressure after filtration. The residue was purified with a flash column chromatography on silica gel (EtOAc/hexane = 1/20) to give **2l** (892 mg, 76%) as a colorless solid: <sup>1</sup>H NMR (400 MHz, CDCl<sub>3</sub>, TMS) δ 3.87 (s, 3H), 7.04 (d, *J* = 8.7 Hz, 2H), 7.39 (dd, *J* = 4.2, 8.3 Hz, 1H), 7.57 (t, *J* = 7.6 Hz, 1H), 7.66 (d, *J* = 8.7 Hz, 2H), 7.71 (dd, *J* = 1.4, 7.1 Hz, 1H), 7.78 (dd, *J* = 1.3, 8.1 Hz, 1H), 8.17 (dd, *J* = 1.7, 8.2 Hz, 1H), 8.95 (dd, *J* = 1.7, 4.2 Hz, 1H); <sup>13</sup>C {<sup>1</sup>H} NMR (100 MHz, CDCl<sub>3</sub>) δ 55.3, 113.5, 120.9, 126.3, 127.0, 128.8, 129.9, 131.7, 131.9, 136.2, 140.5, 146.1, 150.1, 159.0.

#### 8-[4-(Trifluoromethyl)phenyl]quinoline [1275591-20-2] (**2m**).<sup>7</sup>

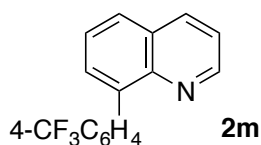

The procedure for preparing **2l** was followed with use of 4-(trifluoromethyl)phenylboronic acid (985 mg, 5.2 mmol). The reaction mixture was stirred under reflux for 32 h. The crude product was purified with a flash column chromatography on silica gel (EtOAc/hexane = 1/20) to give **2m** (508 mg,

37%) as a colorless solid:  $^1\text{H}$  NMR (400 MHz,  $\text{CDCl}_3$ , TMS)  $\delta$  7.42 (dd,  $J = 4.2, 8.3$  Hz, 1H), 7.61 (t,  $J = 7.6$  Hz, 1H), 7.70–7.77 (m, 3H), 7.81 (d,  $J = 8.2$  Hz, 2H), 7.86 (dd,  $J = 1.2, 8.1$  Hz, 1H), 8.21 (dd,  $J = 1.6, 8.3$  Hz, 1H), 8.94 (dd,  $J = 1.7, 4.2$  Hz, 1H);  $^{13}\text{C}$   $\{^1\text{H}\}$  NMR (100 MHz,  $\text{CDCl}_3$ )  $\delta$  121.2, 124.4 (q,  $J = 272$  Hz), 124.9 (q,  $J = 4$  Hz), 126.3, 128.3, 128.7, 129.3 (q,  $J = 32$  Hz), 130.4, 130.9, 136.3, 139.4, 143.2, 145.7, 150.5.

#### 8-(2-Methylphenyl)quinoline [57479-11-5] (**2n**).<sup>8</sup>

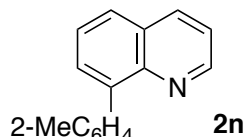

The procedure for preparing **2l** was followed with use of 2-methylphenylboronic acid (714 mg, 5.3 mmol). The reaction mixture was stirred under reflux for 22 h. The crude product was purified with a flash column chromatography on silica gel (EtOAc/hexane = 1/5) to give **2n** (972 mg, 89%) as a colorless solid:  $^1\text{H}$  NMR (400 MHz,  $\text{CDCl}_3$ , TMS)  $\delta$  2.04 (s, 3H), 7.27–7.36 (m, 5H), 7.53–7.59 (m, 2H), 7.80 (dd,  $J = 3.0, 6.6$  Hz, 1H), 8.14 (dd,  $J = 1.6, 8.2$  Hz, 1H), 8.89 (dd,  $J = 1.7, 4.2$  Hz, 1H);  $^{13}\text{C}$   $\{^1\text{H}\}$  NMR (100 MHz,  $\text{CDCl}_3$ )  $\delta$  20.4, 120.8, 125.3, 126.0, 127.4, 127.6, 128.3, 129.7, 130.1, 130.3, 136.0, 136.8, 139.8, 141.4, 146.5, 150.3.

#### 8-Cyclohexylquinoline [1539656-77-3] (**2p**).

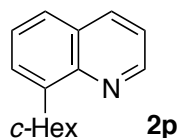

In a nitrogen-filled drybox,  $\text{Pd}(\text{OAc})_2$  (112 mg, 0.50 mmol) and DPPF (306 mg, 0.55 mmol) were placed in a 5 mL screw-capped vial equipped with a stirring bar. After dry THF (5.0 mL) was added, the vial was sealed with a screw cap containing a PTFE/silicone septum and then removed from the drybox. The solution was stirred at ambient temperature for 10 min. 8-(Trifluoromethanesulfoxy)quinoline (1.39 g, 5.0 mmol) was placed in a 100 mL two-neck flask, which was equipped with a stirring bar, rubber septum, and Dimroth condenser having a three-way stopcock. After the reaction vessel was evacuated and charged with nitrogen gas three times, the catalyst solution prepared above was transferred through a cannula into the flask, and a 0.5 M solution of cyclohexylzinc bromide in THF (55 mL, 28 mmol) was added with a syringe to the solution. The mixture was stirred under reflux for 60 h. After cooled to ambient temperature, the mixture was washed with water. The aqueous layer was extracted three times with EtOAc. The combined organic layer was dried over  $\text{Na}_2\text{SO}_4$ , and then evaporated under reduced pressure after filtration. The residue was purified with a flash column chromatography on silica gel (EtOAc/hexane = 1/20) to give **2p** (837 mg, 79%) as pale yellow oil:  $^1\text{H}$  NMR (400 MHz,  $\text{CDCl}_3$ , TMS)  $\delta$  1.26–1.39 (m, 1H), 1.45–1.79 (m, 4H), 1.78–1.92 (m, 3H), 1.97–2.05 (m, 2H), 4.04 (tt,  $J = 3.3, 11.8$  Hz, 1H), 7.33 (dd,  $J = 4.1, 8.2$  Hz, 1H), 7.48 (t,  $J = 7.6$  Hz, 1H), 7.58 (d,  $J = 7.2$  Hz, 1H), 7.61 (d,  $J = 8.0$  Hz, 1H), 8.08 (dd,  $J = 1.6, 8.2$  Hz, 1H), 8.93 (dd,  $J = 1.7,$



4.1 Hz, 1H);  $^{13}\text{C}$   $\{^1\text{H}\}$  NMR (100 MHz,  $\text{CDCl}_3$ )  $\delta$  26.5, 27.0, 34.1, 37.1, 120.6, 125.4, 125.7, 126.4, 128.3, 136.3, 146.1, 146.6, 149.1; IR (neat) 2925, 2849, 1496, 1447, 826, 795  $\text{cm}^{-1}$ ; Anal. Calcd for  $\text{C}_{15}\text{H}_{17}\text{N}$ : C, 85.26; H, 8.11; N, 6.63. Found: C, 85.32; H, 8.06; N, 6.55.

## Catalytic Asymmetric Hydrogenation of Quinolines 2

### Procedure A: General Procedure for the Optimization of the Hydrogenation of 2b (Table 1).

$\text{Ru}(\eta^3\text{-methallyl})_2(\text{cod})$  (1.6 mg, 50  $\mu\text{mol}$ ) and (*S,S*)-(*R,R*)-PhTRAP (**1**) (4.4 mg, 5.5  $\mu\text{mol}$ ) were placed in a 2.0 mL Schlenk tube, which was equipped with a stirring bar, rubber septum and three-way stopcock. After the reaction vessel was evacuated and charged with nitrogen gas three times, a solvent (1.0 mL) and a base (50  $\mu\text{mol}$ , if liquid) were added into the Schlenk tube through the septum by using a syringe. The catalyst solution was stirred for 10 min at ambient temperature. Methyl quinoline-6-carboxylate (**2b**) (93.6 mg, 0.50 mmol), a base (50  $\mu\text{mol}$ , if solid), and a stirring bar were placed in a 50 mL test tube, which was sealed with a rubber septum, and then the tube was evacuated and charged with nitrogen gas three times. The catalyst solution was transferred through a cannula into the test tube. After the septum was removed, the test tube was quickly inserted into the nitrogen-purged stainless autoclave, and then the autoclave was sealed immediately. Hydrogen gas was introduced into the autoclave until the pressure gauge indicated over 5.0 MPa, and then the pressure was carefully released to 0.1 MPa. This procedure was repeated twice, and finally the inside of the autoclave was pressurized with hydrogen to 5.0 MPa. The mixture was vigorously stirred at 80°C for 24 h. The autoclave was cooled to room temperature, and then excess hydrogen gas was released carefully. The reaction mixture was evaporated under reduced pressure. The residue was analyzed with  $^1\text{H}$  NMR in order to determine its composition, and then purified with a flash column chromatography (EtOAc/hexane = 2/1) on silica gel to give the desired 5,6,7,8-tetrahydroquinoline-6-carboxylate **3b**. Results of the selected experiments are shown in Tables 1 and S-1.

**Table S-1.** Effect of ligand on the ruthenium-catalyzed hydrogenation of **2b**.<sup>a</sup>

| 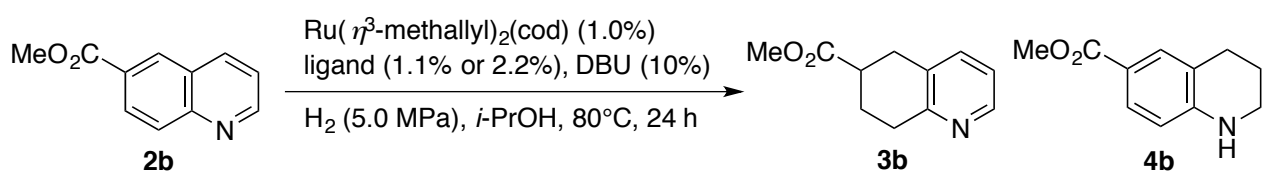 |          |                          |                                    |
|--------------------------------------------------------------------------------------|----------|--------------------------|------------------------------------|
| entry                                                                                | ligand   | conv. (%) <sup>b,c</sup> | <b>3b</b> : <b>4b</b> <sup>b</sup> |
| 1                                                                                    | DPPE     | >99                      | 1:99                               |
| 2                                                                                    | DPPP     | >99                      | 2:98                               |
| 3                                                                                    | DPPB     | >99                      | 3:97                               |
| 4                                                                                    | DPPPent  | >99                      | 5:95                               |
| 5                                                                                    | DPPBz    | >99                      | 1:99                               |
| 6                                                                                    | DPEphos  | 58                       | 3:97                               |
| 7                                                                                    | Xantphos | >99                      | 13:87                              |

|                 |                                                   |     |                    |
|-----------------|---------------------------------------------------|-----|--------------------|
| 8               | DPPF                                              | 64  | 19:81              |
| 9 <sup>d</sup>  | P( <i>c</i> -Hex) <sub>3</sub>                    | 49  | 33:67              |
| 10 <sup>d</sup> | PPh <sub>3</sub>                                  | >99 | 34:66              |
| 11              | Josiphos <b>L1</b>                                | >99 | 4:96               |
| 12              | ( <i>R</i> )-( <i>S</i> )-BPPFA                   | >99 | 4:96               |
| 13              | ( <i>S,S</i> )-DIOP                               | >99 | 3:97               |
| 14              | ( <i>S,S</i> )-Chiraphos                          | 72  | 2:98               |
| 15              | ( <i>R</i> )-BINAP                                | 68  | 4:96               |
| 16              | ( <i>R,R</i> )-Me-DuPHOS                          | >99 | 2:98               |
| 16 <sup>d</sup> | Monophos <b>L2</b>                                | >99 | 2:98               |
| 17 <sup>d</sup> | ( <i>R</i> )-MeO-MOP                              | 96  | 25:75 <sup>e</sup> |
| 18              | ( <i>S,S</i> )-( <i>R,R</i> )-PhTRAP ( <b>1</b> ) | >99 | 85:15 <sup>f</sup> |

<sup>a</sup> Reactions were conducted on a 0.50 mmol scale in 1.0 mL of *i*-PrOH under 5.0 MPa of H<sub>2</sub> at 80°C for 24 h. The ratio of **2b**:Ru( $\eta^3$ -methallyl)<sub>2</sub>(cod):ligand:DBU was 100:1.0:1.1:10 unless otherwise noted.

<sup>b</sup> Determined by <sup>1</sup>H NMR analysis. <sup>c</sup> A small amount of isopropyl ester was formed. <sup>d</sup> The ratio of Ru( $\eta^3$ -methallyl)<sub>2</sub>(cod):ligand was 1.0:2.2. <sup>e</sup> **3b** was obtained with 25% ee. <sup>f</sup> **3b** was obtained with 35% ee.

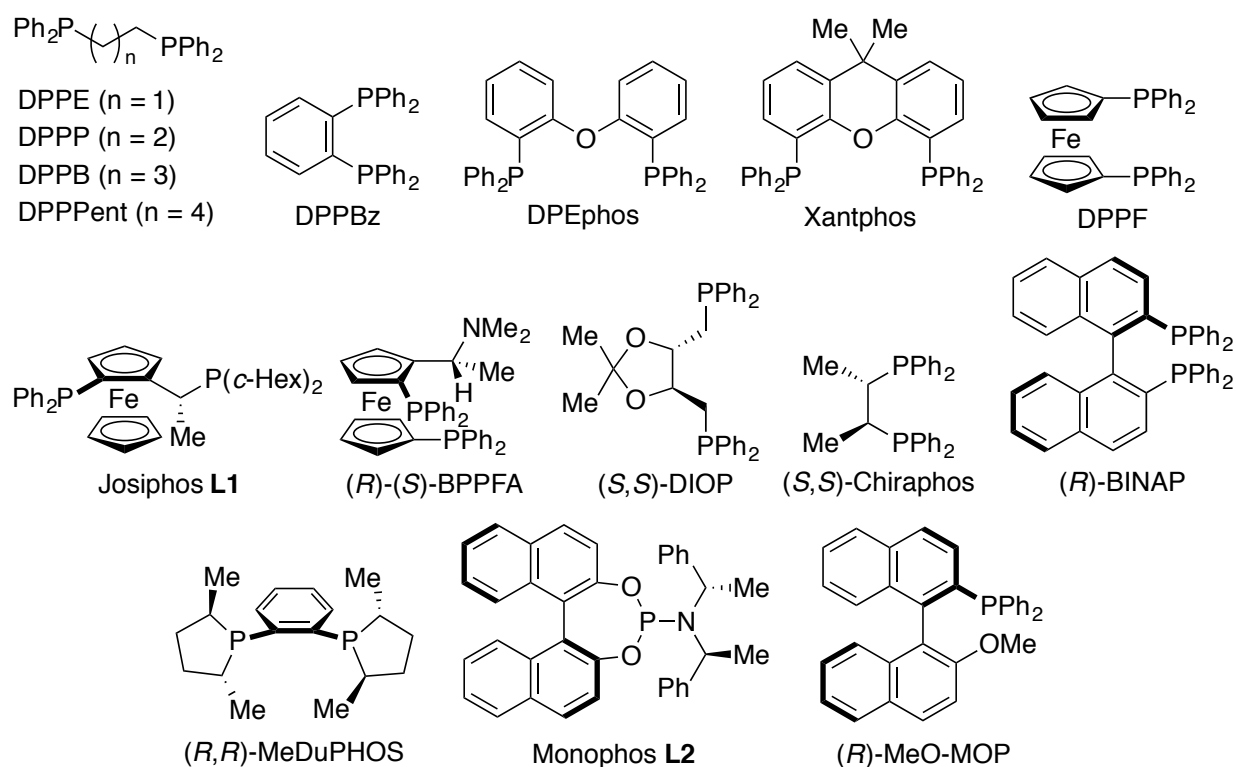

**Procedure B: General Procedure for the Catalytic Asymmetric Hydrogenation of Quinolines **2** (Tables 2 and 3).** Ru( $\eta^3$ -methallyl)<sub>2</sub>(cod) (1.6 mg, 50  $\mu$ mol) and (*S,S*)-(*R,R*)-PhTRAP (**1**) (4.4 mg, 5.5  $\mu$ mol) were placed in a 2.0 mL Schlenk tube, which was equipped with a stirring bar, rubber septum and three-way stopcock. After the reaction vessel was evacuated and charged with nitrogen gas three times, dry *i*-PrOH or EtOAc (1.0 mL) was added into the Schlenk tube through the septum by using a syringe.

The catalyst solution was stirred for 10 min at ambient temperature. A quinoline **2** (0.25 mmol), K<sub>2</sub>CO<sub>3</sub> (6.9 mg, 50  $\mu$ mol), and a stirring bar were placed in a 50 mL test tube, which was sealed with a rubber septum, and then the tube was evacuated and charged with nitrogen gas three times. The catalyst solution was transferred through a cannula into the test tube. After the septum was removed, the test tube was quickly inserted into the nitrogen-purged stainless autoclave, and then the autoclave was sealed immediately. Hydrogen gas was introduced into the autoclave until the pressure gauge indicated over 5.0 MPa, and then the pressure was carefully released to 0.1 MPa. This procedure was repeated twice, and finally the inside of the autoclave was pressurized with hydrogen to 5.0 MPa. The mixture was vigorously stirred for 24 h. The autoclave was cooled to room temperature, and then excess hydrogen gas was released carefully. The reaction mixture was evaporated under reduced pressure. The residue was purified with a flash column chromatography on silica gel to give the desired 5,6,7,8-tetrahydroquinoline **3**.

### 2-Phenyl-5,6,7,8-tetrahydroquinoline [1570-04-3] (**3a**) (eq 1).<sup>9</sup>

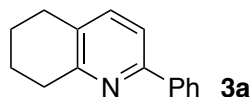

Procedure A was followed with use of Et<sub>3</sub>N (7.0  $\mu$ L, *d* 0.726 g/mL, 50  $\mu$ mol) and EtOAc. 2-Phenylquinoline (**2a**) (102 mg, 0.50 mmol) was used in place of **2b**. The crude product was purified with a flash column chromatography on silica gel (EtOAc/hexane = 1/20) to give **3a** (101 mg, 97%) as colorless oil: <sup>1</sup>H NMR (400 MHz, CDCl<sub>3</sub>, TMS)  $\delta$  1.80–1.88 (m, 2H), 1.89–1.97 (m, 2H), 2.80 (t, *J* = 6.3 Hz, 2H), 3.00 (t, *J* = 6.3 Hz, 2H), 7.34–7.47 (m, 5H), 7.94 (d, *J* = 7.8 Hz, 2H); <sup>13</sup>C {<sup>1</sup>H} NMR (100 MHz, CDCl<sub>3</sub>)  $\delta$  22.8, 23.2, 28.5, 32.8, 117.9, 126.8, 128.3, 128.6, 130.7, 137.4, 139.9, 154.6, 157.2.

### (–)-Methyl 5,6,7,8-tetrahydroquinoline-6-carboxylate [76384-36-6] (**3b**) (Table 1, entry 6).<sup>10</sup>

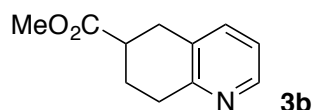

Procedure A was followed with use of methyl quinoline-6-carboxylate (**2b**) (94.0mg, 0.50 mmol), Cs<sub>2</sub>CO<sub>3</sub> (16.3 mg, 50  $\mu$ mol), and EtOAc. The crude product was purified with a flash column chromatography on silica gel (EtOAc/hexane = 1/3) to give **3b** (82.9 mg, 86%) as pale yellow oil: [ $\alpha$ ]<sub>D</sub><sup>26</sup> = –18.7 (*c* 1.12, CHCl<sub>3</sub>) (for 35% ee of **3b**); <sup>1</sup>H NMR (400 MHz, CDCl<sub>3</sub>, TMS)  $\delta$  1.93–2.05 (m, 1H), 2.26–2.34 (m, 1H), 2.75–2.83 (m, 1H), 2.91–3.10 (m, 4H), 3.74 (s, 3H), 7.05 (dd, *J* = 4.7, 7.6 Hz, 1H), 7.39 (d, *J* = 7.6 Hz, 1H), 8.37 (d, *J* = 4.7 Hz, 1H); <sup>13</sup>C {<sup>1</sup>H} NMR (100 MHz, CDCl<sub>3</sub>)  $\delta$  25.7, 30.8, 31.4, 39.2, 51.8, 121.1, 130.0, 136.7, 147.2, 155.9, 175.2.

The enantiomeric excess of **3b** was determined to be 31% ee by the HPLC analysis with Chiralcel OD-H (4.6 mm  $\phi$   $\times$  250 mm): 10 or 30% 2-propanol in hexane, 0.5 mL/min flow, at 35°C, UV 268 nm detection, (+) *t*<sub>1</sub> = 9.5 min, (–) *t*<sub>2</sub> = 10.8 min (30% 2-propanol in hexane).

**(-)-6-Isopropyl-5,6,7,8-tetrahydroquinoline [76384-36-6] (3c) (Table 1, entry 12).<sup>11</sup>**

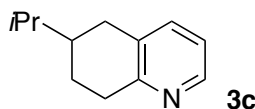

Procedure A was followed with use of DBU (7.5  $\mu$ L,  $d$  1.018 g/mL, 50  $\mu$ mol) and *i*-PrOH. 6-Isopropylquinoline (**2c**) (85.8 mg, 0.50 mmol) was used in place of **2b**. The reaction was conducted for 48 h. The crude product was purified with a flash column chromatography on silica gel (EtOAc/hexane = 1/10 to 1/3) to give **3c** (29.0 mg, 33%) as colorless oil and 6-isopropyl-1,2,3,4-tetrahydroquinoline (**4c**) (40.0 mg, 46%) as colorless oil. **3c**:  $[\alpha]_D^{25} = -64.9$  ( $c$  1.17, CHCl<sub>3</sub>); <sup>1</sup>H NMR (400 MHz, CDCl<sub>3</sub>, TMS)  $\delta$  0.976 (d,  $J$  = 6.7 Hz, 3H), 0.981 (d,  $J$  = 6.7 Hz, 3H), 1.44–1.69 (m, 3H), 1.99–2.09 (m, 1H), 2.53 (dd,  $J$  = 10.3, 16.3 Hz, 1H), 2.78 (dd,  $J$  = 4.2, 16.3 Hz, 1H), 2.83–2.95 (m, 1H), 2.98–3.07 (m, 1H), 7.01 (dd,  $J$  = 4.7, 7.6 Hz, 1H), 7.35 (d,  $J$  = 7.6 Hz, 1H), 8.34 (d,  $J$  = 4.7 Hz, 1H); <sup>13</sup>C {<sup>1</sup>H} NMR (100 MHz, CDCl<sub>3</sub>)  $\delta$  19.7, 19.8, 26.4, 32.0, 32.4, 32.7, 40.3, 120.8, 132.1, 136.9, 146.7, 157.4. **4c**: <sup>1</sup>H NMR (400 MHz, CDCl<sub>3</sub>, TMS)  $\delta$  1.19 (d,  $J$  = 6.9 Hz, 6H), 1.90–1.97 (m, 2H), 2.68–2.81 (m, 3H), 3.27 (t,  $J$  = 5.5 Hz, 2H), 3.71 (br, 1H), 6.43 (d,  $J$  = 8.0 Hz, 1H), 6.80–6.86 (m, 2H); <sup>13</sup>C {<sup>1</sup>H} NMR (100 MHz, CDCl<sub>3</sub>)  $\delta$  22.4, 24.3, 27.0, 33.2, 42.1, 114.4, 121.4, 124.6, 127.4, 137.6, 142.7; IR (neat) 3402, 2954, 2865, 1616, 1511, 1297, 813 cm<sup>-1</sup>; Anal. Calcd for C<sub>12</sub>H<sub>17</sub>N: C, 82.23; H, 9.78; N, 7.99. Found: C, 82.11; H, 9.80; N, 7.89.

The enantiomeric excess of **3c** was determined to be 62% ee by the HPLC analysis with Chiralcel OD-H (4.6 mm  $\phi$   $\times$  250 mm): 4% 2-propanol in hexane, 0.5 mL/min flow, at 35°C, UV 268 nm detection, (+)  $t_1$  = 15.2 min, (–)  $t_2$  = 18.2 min.

**3-Methoxy-5,6,7,8-tetrahydroquinoline [405174-69-8] (3d) (Table 2, entry 1).<sup>10</sup>**

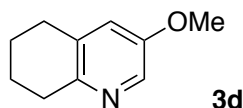

Procedure B was followed with use of 3-methoxyquinoline (**2d**) (40.2 mg, 0.25 mmol). The reaction was conducted in *i*-PrOH at 80°C. The crude product was purified with a flash column chromatography on silica gel (EtOAc/hexane = 1/1) to give **3d** (37.4 mg, 91%) as pale yellow oil: <sup>1</sup>H NMR (400 MHz, CDCl<sub>3</sub>, TMS)  $\delta$  1.75–1.83 (m, 2H), 1.83–1.91 (m, 2H), 2.75 (t,  $J$  = 6.2 Hz, 2H), 2.85 (t,  $J$  = 6.4 Hz, 2H), 3.81 (s, 3H), 6.88 (d,  $J$  = 2.6 Hz, 1H), 8.07 (d,  $J$  = 2.6 Hz, 1H); <sup>13</sup>C {<sup>1</sup>H} NMR (100 MHz, CDCl<sub>3</sub>)  $\delta$  22.6, 23.3, 29.0, 31.6, 55.5, 121.1, 132.5, 134.5, 149.4, 153.7.

**4-Methoxy-5,6,7,8-tetrahydroquinoline [860202-86-4] (3e) (Table 2, entry 2).<sup>12</sup>**

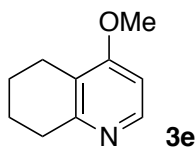

Procedure B was followed with use of 4-methoxyquinoline (**2e**) (39.8mg, 0.25 mmol). The reaction was conducted in *i*-PrOH at 80°C. The crude product was purified with a flash column chromatography on silica gel (MeOH/EtOAc = 1/10) to give **3e** (40.4 mg, 99%) as pale yellow oil: <sup>1</sup>H NMR (400 MHz, CDCl<sub>3</sub>, TMS) δ 1.73–1.88 (m, 4H), 2.62 (t, *J* = 6.2 Hz, 2H), 2.87 (t, *J* = 6.2 Hz, 2H), 3.83 (s, 3H), 6.57 (d, *J* = 5.6 Hz, 1H), 8.26 (d, *J* = 5.6 Hz, 1H); <sup>13</sup>C {<sup>1</sup>H} NMR (100 MHz, CDCl<sub>3</sub>) δ 22.06, 22.13, 22.7, 32.4, 55.0, 103.0, 121.0, 147.8, 157.8, 163.4.

**(+)-5-Methoxy-5,6,7,8-tetrahydroquinoline (3f) (Table 2, entry 3).**

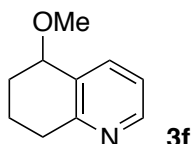

Procedure B was followed with use of 5-methoxyquinoline (**2f**) (40.0 mg, 0.25 mmol). The reaction was conducted in *i*-PrOH at 80°C. The crude product was purified with a flash column chromatography on silica gel (EtOAc/hexane = 1/1) to give **3f** (16.5 mg, 40%) as colorless oil:  $[\alpha]_D^{25} = +1.8$  (*c* 1.11, CHCl<sub>3</sub>); <sup>1</sup>H NMR (400 MHz, CDCl<sub>3</sub>, TMS) δ 1.77–1.87 (m, 1H), 1.94–2.14 (m, 3H), 2.87 (dt, *J* = 17.8, 6.8 Hz, 1H), 2.99 (dt, *J* = 17.8, 6.2 Hz, 1H), 3.46 (s, 3H), 4.34 (t, *J* = 5.2 Hz, 1H), 7.11 (dd, *J* = 4.7, 7.6 Hz, 1H), 7.67 (d, *J* = 7.6 Hz, 1H), 8.44 (dd, *J* = 1.3, 4.7 Hz, 1H); <sup>13</sup>C {<sup>1</sup>H} NMR (100 MHz, CDCl<sub>3</sub>) δ 18.4, 26.9, 32.1, 56.2, 76.5, 121.1, 132.2, 136.8, 148.6, 157.5; IR (neat) 2940, 1576, 1443, 1351, 1087, 803 cm<sup>-1</sup>; HRMS (FAB) Calcd for C<sub>10</sub>H<sub>14</sub>NO: 164.1075. Found: *m/z* = 164.1055 ([M+H]<sup>+</sup>).

The enantiomeric excess of **3f** was determined to be 42% ee by the HPLC analysis with Chiralcel OD-H (4.6 mm  $\phi$   $\times$  250 mm): 10% 2-propanol in hexane, 0.5 mL/min flow, at 35°C, UV 268 nm detection, (+) *t*<sub>1</sub> = 10.1 min, (–) *t*<sub>2</sub> = 13.7 min.

**(+)-6-Methoxy-5,6,7,8-tetrahydroquinoline [75414-06-1] (3g) (Table 2, entry 4).<sup>13</sup>**

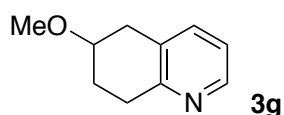

Procedure B was followed with use of 6-methoxyquinoline (**2g**) (39.7 mg, 0.25 mmol). The reaction was conducted in *i*-PrOH at 80°C. The crude product was purified with a flash column chromatography on silica gel (EtOAc/hexane = 1/1) to give **3g** (32.0 mg, 79%) as pale yellow oil:  $[\alpha]_D^{25} = +6.3$  (*c* 1.15, CHCl<sub>3</sub>); <sup>1</sup>H NMR (400 MHz, CDCl<sub>3</sub>, TMS) δ 1.96–2.06 (m, 1H), 2.08–2.17 (m, 1H), 2.83 (dd, *J* = 6.7, 16.7 Hz, 1H), 2.92 (dt, *J* = 17.6, 6.9 Hz, 1H), 3.01–3.14 (m, 2H), 3.43 (s, 3H), 3.69–3.75 (m, 1H), 7.04 (dd, *J* = 4.7, 7.6 Hz, 1H), 7.37 (d, *J* = 7.6 Hz, 1H), 8.37 (d, *J* = 4.7 Hz, 1H); <sup>13</sup>C {<sup>1</sup>H} NMR (100 MHz, CDCl<sub>3</sub>) δ 27.0, 29.4, 34.4, 55.9, 74.6, 121.1, 129.4, 137.2, 147.1, 156.4.

The enantiomeric excess of **3g** was determined to be 58% ee by the HPLC analysis with Chiralpak AS-H (4.6 mm  $\phi$   $\times$  250 mm): 4% 2-propanol in hexane, 0.5 mL/min flow, at 35°C, UV 268 nm detection, (–) *t*<sub>1</sub> = 14.1 min, (+) *t*<sub>2</sub> = 18.4 min.

**(-)-7-Methoxy-5,6,7,8-tetrahydroquinoline (3h) (Table 2, entry 5).**

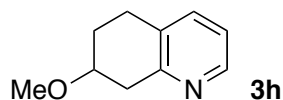

Procedure B was followed with use of 7-methoxyquinoline (**2h**) (39.8 mg, 0.25 mmol). The reaction was conducted in *i*-PrOH at 80°C. The crude product was purified with a flash column chromatography on silica gel (EtOAc/hexane = 1/1) to give **3h** (34.1 mg, 84%) as pale yellow oil:  $[\alpha]_D^{25} = -9.6$  (*c* 1.11, CHCl<sub>3</sub>); <sup>1</sup>H NMR (400 MHz, CDCl<sub>3</sub>, TMS) δ 1.89–1.98 (m, 1H), 1.99–2.07 (m, 1H), 2.74 (dt, *J* = 16.9, 6.6 Hz, 1H), 2.93 (dt, *J* = 16.9, 6.6 Hz, 1H), 3.00 (dd, *J* = 6.2, 17.3 Hz, 1H), 3.21 (dd, *J* = 4.8, 17.3 Hz, 1H), 3.43 (s, 3H), 3.76–3.82 (m, 1H), 7.04 (dd, *J* = 4.7, 7.7 Hz, 1H), 7.37 (d, *J* = 7.7 Hz, 1H), 8.37 (d, *J* = 4.7 Hz, 1H); <sup>13</sup>C {<sup>1</sup>H} NMR (100 MHz, CDCl<sub>3</sub>) δ 25.1, 27.0, 38.0, 55.9, 75.1, 121.1, 131.3, 136.2, 147.2, 154.9; IR (neat) 2930, 1577, 1446, 1096, 790 cm<sup>-1</sup>; HRMS (FAB) Calcd for C<sub>10</sub>H<sub>14</sub>NO: 164.1075. Found: *m/z* = 164.1102 ([M+H]<sup>+</sup>).

The enantiomeric excess of **3h** was determined to be 37% ee by the HPLC analysis with Chiralcel OD-H (4.6 mm  $\phi$  × 250 mm): 10% or 20% 2-propanol in hexane, 0.5 mL/min flow, at 35°C, UV 268 nm detection, (–) *t*<sub>1</sub> = 9.4 min, (+) *t*<sub>2</sub> = 11.3 min (20% 2-propanol in hexane).

**(+)-8-Methoxy-5,6,7,8-tetrahydroquinoline [75414-07-2] (3i) (Table 2, entry 9).<sup>13</sup>**

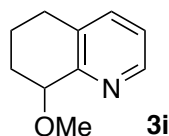

Procedure B was followed with use of 8-methoxyquinoline (**2i**) (159 mg, 1.0 mmol). The reaction was conducted in EtOAc (1.0 mL) at 60°C. The crude product was purified with a flash column chromatography on silica gel (EtOAc/hexane = 1/1) to give **3i** (154 mg, 94%) as pale yellow oil:  $[\alpha]_D^{24} = +37.6$  (*c* 1.04, CHCl<sub>3</sub>); <sup>1</sup>H NMR (400 MHz, CDCl<sub>3</sub>, TMS) δ 1.72–1.90 (m, 2H), 1.95–2.07 (m, 1H), 2.20–2.29 (m, 1H), 2.72 (ddd, *J* = 5.8, 10.1, 17.0 Hz, 1H), 2.84 (dt, *J* = 17.0, 4.7 Hz, 1H), 3.54 (s, 3H), 4.36 (t, *J* = 3.8 Hz, 1H), 7.14 (dd, *J* = 4.7, 7.7 Hz, 1H), 7.42 (d, *J* = 7.7 Hz, 1H), 8.48 (d, *J* = 4.7 Hz, 1H); <sup>13</sup>C {<sup>1</sup>H} NMR (100 MHz, CDCl<sub>3</sub>) δ 17.5, 27.5, 28.4, 57.0, 77.6, 122.8, 132.9, 137.2, 147.2, 155.2.

The enantiomeric excess of **3i** was determined to be 82% ee by the HPLC analysis with Chiralcel OD-H (4.6 mm  $\phi$  × 250 mm): 10% or 20% 2-propanol in hexane, 0.5 mL/min flow, at 35°C, UV 275 nm detection, (+) *t*<sub>1</sub> = 8.7 min, (–) *t*<sub>2</sub> = 10.2 min (20% 2-propanol in hexane).

**(+)-8-[(Triisopropylsilyloxy)methoxy]-5,6,7,8-tetrahydroquinoline (3j) (Table 3, entry 1).**

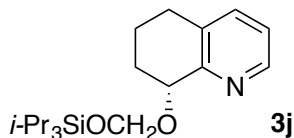

Procedure B was followed with use of 8-[(triisopropylsilyloxy)methoxy]quinoline (**2j**) (78.8 mg, 0.24 mmol). The reaction was conducted in EtOAc at 60°C. The crude product was purified with a flash

column chromatography on silica gel (EtOAc/hexane = 1/3) to give **3j** (77.2 mg, 97%) as colorless oil:  $[\alpha]_D^{26} = +33.4$  ( $c$  1.04,  $\text{CHCl}_3$ );  $^1\text{H}$  NMR (400 MHz,  $\text{CDCl}_3$ , TMS)  $\delta$  1.02–1.18 (m, 21H), 1.73–1.82 (m, 1H), 1.89–1.98 (m, 1H), 2.01–2.14 (m, 1H), 2.29–2.38 (m, 1H), 2.71 (ddd,  $J = 5.9, 10.0, 16.9$  Hz, 1H), 2.83 (dt,  $J = 16.9, 4.8$  Hz, 1H), 4.76 (t,  $J = 4.0$  Hz, 1H), 5.19 (d,  $J = 4.9$  Hz, 1H), 5.34 (d,  $J = 4.9$  Hz, 1H), 7.11 (dd,  $J = 4.7, 7.7$  Hz, 1H), 7.39 (d,  $J = 7.7$  Hz, 1H), 8.44 (d,  $J = 4.7$  Hz, 1H);  $^{13}\text{C}$   $\{^1\text{H}\}$  NMR (100 MHz,  $\text{CDCl}_3$ )  $\delta$  12.0, 17.85, 17.89, 28.3, 30.3, 74.8, 90.0, 122.6, 132.8, 137.0, 147.2, 155.9; IR (neat) 2944, 2867, 1500, 1470, 1376, 1318, 1251, 1156, 1084, 1061, 984  $\text{cm}^{-1}$ ; Anal. Calcd for  $\text{C}_{19}\text{H}_{33}\text{NO}_2\text{Si}$ : C, 68.01; H, 9.91; N, 4.17. Found: C, 67.99; H, 9.93; N, 4.05.

The enantiomeric excess of **3j** was determined to be 81% ee by the HPLC analysis with Chiralcel OD-H (4.6 mm  $\phi \times 250$  mm): 1% 2-propanol in hexane, 0.5 mL/min flow, at 35°C, UV 268 nm detection, (+)  $t_1 = 9.3$  min, (–)  $t_2 = 10.9$  min.

**(+)-8-Phenyl-5,6,7,8-tetrahydroquinoline [56826-78-9] (3k) (Table 3, entry 2).<sup>13</sup>**

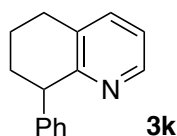

Procedure B was followed with use of 8-phenylquinoline (**2k**) (52.3 mg, 0.25 mmol). The reaction was conducted in *i*-PrOH at 40°C for 48 h. The crude product was purified with a flash column chromatography on silica gel (EtOAc/hexane = 1/5) to give **3k** (46.5 mg, 87%) as colorless oil:  $[\alpha]_D^{24} = +34.5$  ( $c$  1.00,  $\text{CHCl}_3$ );  $^1\text{H}$  NMR (400 MHz,  $\text{CDCl}_3$ , TMS)  $\delta$  1.65–1.76 (m, 1H), 1.78–1.90 (m, 1H), 1.92–2.02 (m, 1H), 2.17–2.27 (m, 1H), 2.79 (dt,  $J = 17.0, 6.7$  Hz, 1H), 2.88 (dt,  $J = 17.0, 6.1$  Hz, 1H), 4.30 (t,  $J = 6.1$  Hz, 1H), 6.98 (d,  $J = 7.2$  Hz, 2H), 7.01 (dd,  $J = 4.8, 7.8$  Hz, 1H), 7.14 (t,  $J = 7.3$  Hz, 1H), 7.23 (t,  $J = 7.5$  Hz, 2H), 7.40 (d,  $J = 7.8$  Hz, 1H), 8.37 (d,  $J = 4.8$  Hz, 1H);  $^{13}\text{C}$   $\{^1\text{H}\}$  NMR (100 MHz,  $\text{CDCl}_3$ )  $\delta$  19.3, 28.8, 32.7, 47.5, 121.0, 125.6, 128.0, 128.4, 132.8, 136.6, 146.2, 147.3, 158.3.

The enantiomeric excess of **3k** was determined to be 73% ee by the HPLC analysis with Chiralcel OD-H (4.6 mm  $\phi \times 250$  mm): 10% 2-propanol in hexane, 0.5 mL/min flow, at 35°C, UV 268 nm detection, (+)  $t_1 = 9.8$  min, (–)  $t_2 = 10.8$  min.

**(+)-8-(4-Methoxyphenyl)-5,6,7,8-tetrahydroquinoline (3l) (Table 3, entry 3).**

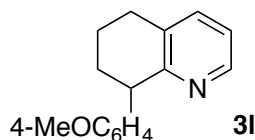

Procedure B was followed with use of 8-(4-methoxyphenyl)quinoline (**2l**) (58.5 mg, 0.25 mmol). The reaction was conducted in *i*-PrOH at 60°C. The crude product was purified with a flash column chromatography on silica gel (EtOAc/hexane = 1/2) to give **3l** (56.1 mg, 94%) as colorless oil:  $[\alpha]_D^{27} = +39.8$  ( $c$  1.02,  $\text{CHCl}_3$ );  $^1\text{H}$  NMR (400 MHz,  $\text{CDCl}_3$ , TMS)  $\delta$  1.67–1.78 (m, 1H), 1.80–2.00 (m, 2H), 2.16–2.26 (m, 1H), 2.81 (dt,  $J = 16.8, 6.7$  Hz, 1H), 2.89 (dt,  $J = 16.8, 6.1$  Hz, 1H), 3.75 (s, 3H), 4.26 (t,  $J = 6.0$  Hz, 1H), 6.80 (d,  $J = 8.6$  Hz, 2H), 6.91 (d,  $J = 8.6$  Hz, 2H), 7.04 (dd,  $J = 4.6, 7.6$  Hz, 1H), 7.42 (d,  $J = 7.6$

Hz, 1H), 8.39 (d,  $J = 4.6$  Hz, 1H);  $^{13}\text{C}$   $\{^1\text{H}\}$  NMR (100 MHz,  $\text{CDCl}_3$ )  $\delta$  19.5, 29.0, 32.9, 46.9, 55.1, 113.6, 121.1, 129.4, 132.9, 136.7, 138.6, 147.4, 157.6, 158.7; IR (neat) 2934, 1511, 1444, 1246, 1177, 1035, 827, 796  $\text{cm}^{-1}$ ; Anal. Calcd for  $\text{C}_{16}\text{H}_{17}\text{NO}$ : C, 80.30; H, 7.16; N, 5.85. Found: C, 80.16; H, 6.89; N, 5.86.

The enantiomeric excess of **3l** was determined to be 72% ee by the HPLC analysis with Chiralcel OD-H (4.6 mm  $\phi \times 250$  mm): 10% 2-propanol in hexane, 0.5 mL/min flow, at 35°C, UV 268 nm detection, (+)  $t_1 = 13.7$  min, (–)  $t_2 = 16.9$  min.

**(+)-8-[4-(Trifluoromethyl)phenyl]-5,6,7,8-tetrahydroquinoline (3m) (Table 3, entry 4).**

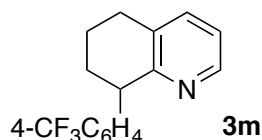

Procedure B was followed with use of 8-[4-(trifluoromethyl)phenyl]quinoline (**2m**) (68.3 mg, 0.25 mmol). The reaction was conducted in *i*-PrOH at 60°C. The crude product was purified with a flash column chromatography on silica gel (EtOAc/hexane = 1/3) to give **3m** (60.8 mg, 88%) as colorless oil:  $[\alpha]_{\text{D}}^{27} = +18.7$  ( $c$  1.01,  $\text{CHCl}_3$ );  $^1\text{H}$  NMR (400 MHz,  $\text{CDCl}_3$ , TMS)  $\delta$  1.71–2.01 (m, 3H), 2.22–2.32 (m, 1H), 2.84 (dt,  $J = 17.0, 6.5$  Hz, 1H), 2.92 (dt,  $J = 17.0, 6.5$  Hz, 1H), 4.36 (t,  $J = 6.4$  Hz, 1H), 7.08 (dd,  $J = 4.7, 7.7$  Hz, 1H), 7.12 (d,  $J = 8.1$  Hz, 2H), 7.46 (d,  $J = 7.7$  Hz, 1H), 7.52 (d,  $J = 8.1$  Hz, 2H), 8.38 (d,  $J = 4.7$  Hz, 1H);  $^{13}\text{C}$   $\{^1\text{H}\}$  NMR (100 MHz,  $\text{CDCl}_3$ )  $\delta$  19.7, 28.9, 32.9, 47.8, 121.6, 124.3 (q,  $J = 272$  Hz), 125.2 (q,  $J = 4$  Hz), 128.1 (q,  $J = 32$  Hz), 128.9, 133.1, 137.0, 147.6, 150.5, 157.6; IR (neat) 2938, 1446, 1327, 1163, 1120, 1067, 833, 790  $\text{cm}^{-1}$ ; Anal. Calcd for  $\text{C}_{16}\text{H}_{14}\text{F}_3\text{N}$ : C, 69.30; H, 5.09; N, 5.05. Found: C, 69.32; H, 5.08; N, 5.09.

The enantiomeric excess of **3m** was determined to be 72% ee by the HPLC analysis with Chiralpak AS-H (4.6 mm  $\phi \times 250$  mm): 10% 2-propanol in hexane, 0.5 mL/min flow, at 35°C, UV 268 nm detection, (–)  $t_1 = 7.9$  min, (+)  $t_2 = 8.7$  min.

**(+)-8-(2-Methylphenyl)-5,6,7,8-tetrahydroquinoline (3n) (Table 3, entry 5).**

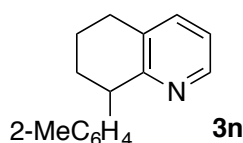

Procedure B was followed with use of 8-(2-methylphenyl)quinoline (**2n**) (54.1 mg, 0.25 mmol). The reaction was conducted in *i*-PrOH at 60°C. The crude product was purified with a flash column chromatography on silica gel (EtOAc/hexane = 1/3) to give **3n** (30.8 mg, 56%) as a colorless solid:  $[\alpha]_{\text{D}}^{25} = +39.0$  ( $c$  1.00,  $\text{CHCl}_3$ );  $^1\text{H}$  NMR (400 MHz,  $\text{CDCl}_3$ , TMS)  $\delta$  1.66–1.77 (m, 1H), 1.81–1.94 (m, 2H), 2.13–2.22 (m, 1H), 2.39 (s, 3H), 2.80 (dt,  $J = 16.7, 6.8$  Hz, 1H), 2.90 (dt,  $J = 16.7, 6.0$  Hz, 1H), 4.50 (t,  $J = 6.1$  Hz, 1H), 6.53 (d,  $J = 7.3$  Hz, 1H), 6.97–7.08 (m, 3H), 7.15 (d,  $J = 7.3$  Hz, 1H), 7.40 (d,  $J = 7.6$  Hz, 1H), 8.37 (d,  $J = 4.7$  Hz, 1H);  $^{13}\text{C}$   $\{^1\text{H}\}$  NMR (100 MHz,  $\text{CDCl}_3$ )  $\delta$  19.4, 19.5, 29.0, 30.5, 44.2, 120.9, 125.4, 125.7, 128.9, 130.4, 133.0, 135.4, 136.5, 144.3, 147.4, 158.9; IR (neat) 3045, 2940, 2857, 1571,



1489, 1443, 807, 789, 757, 729  $\text{cm}^{-1}$ ; Anal. Calcd for  $\text{C}_{16}\text{H}_{17}\text{N}$ : C, 86.05; H, 7.67; N, 6.27. Found: C, 85.77; H, 7.69; N, 6.30.

The enantiomeric excess of **3n** was determined to be 41% ee by the HPLC analysis with Chiralcel OJ-H (4.6 mm  $\phi \times 250$  mm): 10% 2-propanol in hexane, 0.5 mL/min flow, at 35°C, UV 268 nm detection, (–)  $t_1 = 12.2$  min, (+)  $t_2 = 13.3$  min.

**(–)-8-Methyl-5,6,7,8-tetrahydroquinoline [52601-66-8] (3o) (Table 3, entry 7).**<sup>13</sup>

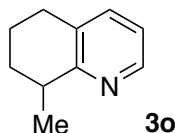

Procedure B was followed with use of 8-methylquinoline (**2o**) (35.9 mg, 0.25 mmol).  $\{\text{Ru}(p\text{-cymene})[(S,S)\text{-(}R,R\text{)-PhTRAP}]\}\text{Cl}$  (5.5 mg, 5.0  $\mu\text{mol}$ ) and DBU (8.2 mg, 55  $\mu\text{mol}$ ) were used in place of  $[\text{Ru}(\eta^3\text{-methallyl})_2(\text{cod})]\text{-(}S,S\text{)-}(R,R\text{)-PhTRAP}$  and  $\text{K}_2\text{CO}_3$ , respectively. The reaction was conducted in *i*-PrOH at 60°C. The crude product was purified with a flash column chromatography on silica gel (EtOAc/hexane = 1/1) to give **3o** (25.9 mg, 71%) as colorless oil:  $[\alpha]_{\text{D}}^{26} = -29.7$  (*c* 1.05,  $\text{CHCl}_3$ );  $^1\text{H}$  NMR (400 MHz,  $\text{CDCl}_3$ , TMS)  $\delta$  1.37 (d,  $J = 7.1$  Hz, 3H), 1.60–1.80 (m, 2H), 1.83–1.94 (m, 1H), 1.98–2.08 (m, 1H), 2.69–2.84 (m, 2H), 3.00 (sextet,  $J = 6.6$  Hz, 1H), 7.01 (dd,  $J = 4.7, 7.6$  Hz, 1H), 7.33 (d,  $J = 7.6$  Hz, 1H), 8.39 (d,  $J = 4.7$  Hz, 1H);  $^{13}\text{C}$   $\{^1\text{H}\}$  NMR (100 MHz,  $\text{CDCl}_3$ )  $\delta$  20.0, 21.3, 29.4, 31.2, 35.6, 120.8, 131.8, 136.6, 146.9, 161.3.

The enantiomeric excess of **3o** was determined to be 79% ee by the HPLC analysis with Chiralcel OB-H (4.6 mm  $\phi \times 250$  mm): 4% 2-propanol in hexane, 0.5 mL/min flow, at 35°C, UV 268 nm detection, (–)  $t_1 = 9.2$  min, (+)  $t_2 = 10.0$  min.

**(–)-8-Cyclohexyl-5,6,7,8-tetrahydroquinoline [75414-11-8] (3p) (Table 3, entry 8).**<sup>13</sup>

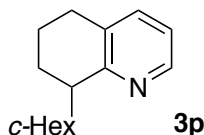

Procedure B was followed with use of 8-cyclohexylquinoline (**2p**) (52.8 mg, 0.25 mmol).  $\{\text{Ru}(p\text{-cymene})[(S,S)\text{-(}R,R\text{)-PhTRAP}]\}\text{Cl}$  (5.5 mg, 5.0  $\mu\text{mol}$ ) and DBU (8.2 mg, 55  $\mu\text{mol}$ ) were used in place of  $[\text{Ru}(\eta^3\text{-methallyl})_2(\text{cod})]\text{-(}S,S\text{)-}(R,R\text{)-PhTRAP}$  and  $\text{K}_2\text{CO}_3$ , respectively. The reaction was conducted in *i*-PrOH at 60°C. The crude product was purified with a flash column chromatography on silica gel (EtOAc/hexane = 1/1) to give **3p** (46.4 mg, 86%) as colorless oil:  $[\alpha]_{\text{D}}^{26} = -75.7$  (*c* 1.00,  $\text{CHCl}_3$ );  $^1\text{H}$  NMR (400 MHz,  $\text{CDCl}_3$ , TMS)  $\delta$  0.97–1.43 (m, 6H), 1.56–1.80 (m, 6H), 1.86–1.97 (m, 2H), 2.30–2.41 (m, 1H), 2.63–2.78 (m, 2H), 2.79–2.88 (m, 1H), 6.98 (dd,  $J = 4.8, 7.6$  Hz, 1H), 7.30 (d,  $J = 7.6$  Hz, 1H), 8.41 (d,  $J = 4.8$  Hz, 1H);  $^{13}\text{C}$   $\{^1\text{H}\}$  NMR (100 MHz,  $\text{CDCl}_3$ )  $\delta$  21.6, 24.1, 26.70, 26.73, 27.0, 27.7, 29.5, 31.5, 41.3, 45.9, 120.3, 133.2, 136.3, 146.7, 159.8.

The enantiomeric excess of **3p** was determined to be 81% ee by the HPLC analysis with Chiralcel OD-H (4.6 mm  $\phi$   $\times$  250 mm): 4% 2-propanol in hexane, 0.5 mL/min flow, at 35°C, UV 268 nm detection, (–)  $t_1$  = 8.1 min, (+)  $t_2$  = 9.0 min.

### **Deprotection of 3j (eq 2).**

**(R)-5,6,7,8-Tetrahydroquinolin-8-ol [451466-81-2] (3q).**<sup>9</sup>

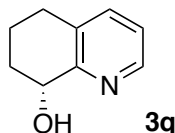

Compound **3j** (81% ee, 62.0 mg, 0.18 mmol) was placed in a 2.0 mL Schlenk tube, which was equipped with a stirring bar, rubber septum and three-way stopcock. After the reaction vessel was evacuated and charged with nitrogen gas three times, a 1.0 M solution of TBAF in THF (0.36 mL, 0.36 mmol) was added into the tube through the septum by using a syringe.<sup>14</sup> The solution was stirred at ambient temperature for 5 h. After the solution was acidified with AcOH and then diluted with water, the resulting mixture was extracted three times with CH<sub>2</sub>Cl<sub>2</sub>. The combined organic layer was dried over Na<sub>2</sub>SO<sub>4</sub>, and then evaporated under reduced pressure after filtration. The residue was purified with a flash column chromatography on silica gel (MeOH/EtOAc = 1/10) to give **3q** (24.7 mg, 90%) as a colorless solid:  $[\alpha]_D^{24}$  = –52.0 (*c* 1.00, CHCl<sub>3</sub>); lit.<sup>9</sup>  $[\alpha]_D^{20}$  = –65 (*c* 1.05, CHCl<sub>3</sub>); <sup>1</sup>H NMR (400 MHz, CDCl<sub>3</sub>, TMS)  $\delta$  1.75–1.88 (m, 2H), 1.95–2.06 (m, 1H), 2.23–2.34 (m, 1H), 2.74–2.90 (m, 2H), 4.11 (br, 1H), 4.71 (dd, *J* = 6.1, 7.9 Hz, 1H), 7.12 (dd, *J* = 4.8, 7.7 Hz, 1H), 7.41 (d, *J* = 7.7 Hz, 1H), 8.41 (d, *J* = 4.8 Hz, 1H); <sup>13</sup>C {<sup>1</sup>H} NMR (100 MHz, CDCl<sub>3</sub>)  $\delta$  19.4, 28.3, 30.7, 68.9, 122.4, 131.6, 136.9, 146.7, 158.0.

The enantiomeric excess of **3q** was determined to be 80% ee by the HPLC analysis with Chiralcel OD-H (4.6 mm  $\phi$   $\times$  250 mm): 10% 2-propanol in hexane, 0.5 mL/min flow, at 35°C, UV 268 nm detection, (*R*)  $t_1$  = 12.4 min, (*S*)  $t_2$  = 15.2 min.

### **Mechanistic Study on the Ruthenium-Catalyzed Hydrogenation of 2.**

**Preparation of 8-phenyl-5,6-dihydroquinoline [343320-64-9] (5k).**

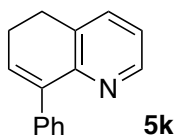

MsOH (400 mg, 4.2 mmol) was placed in a 10 mL Schlenk tube, which was equipped with a stirring bar, rubber septum, and cold finger. Toluene (3.0 mL) and then 8-phenyl-5,6,7,8-tetrahydroquinolin-8-ol (225 mg, 1.0 mmol) were added into the tube. The solution was stirred under reflux for 12 h. After saturated Na<sub>2</sub>CO<sub>3</sub> aq. was added, the mixture was extracted three times with EtOAc. The combined organic layer was washed with brine, dried over Na<sub>2</sub>SO<sub>4</sub>, and

then evaporated under reduced pressure after filtration. The residue was purified with a flash column chromatography on silica gel (EtOAc/hexane = 1/10) to give **5k** (202 mg, 97%) as a colorless solid: mp. 78.0–78.1°C;  $^1\text{H}$  NMR (400 MHz,  $\text{CDCl}_3$ , TMS)  $\delta$  2.46 (dt,  $J$  = 4.7, 8.0 Hz, 2H), 2.90 (t,  $J$  = 8.0 Hz, 2H), 6.43 (t,  $J$  = 4.7 Hz, 1H), 7.05 (dd,  $J$  = 4.9, 7.5 Hz, 1H), 7.30 (t,  $J$  = 7.1 Hz, 1H), 7.37 (t,  $J$  = 7.3 Hz, 2H), 7.41–7.47 (m, 3H), 8.40 (dd,  $J$  = 1.7, 4.9 Hz, 1H);  $^{13}\text{C}$   $\{^1\text{H}\}$  NMR (100 MHz,  $\text{CDCl}_3$ )  $\delta$  23.0, 27.8, 121.6, 127.2, 128.0, 128.8, 132.2, 134.7, 139.5, 140.9, 147.1, 153.6; IR (neat) 3051, 2936, 2888, 2829, 1560, 1492, 1431, 796, 754, 697  $\text{cm}^{-1}$ ; Anal. Calcd for  $\text{C}_{16}\text{H}_{17}\text{N}$ : C, 86.05; H, 7.67; N, 6.27. Found: C, 85.77; H, 7.69; N, 6.30.

### Hydrogenation of **5k** (eq 3).

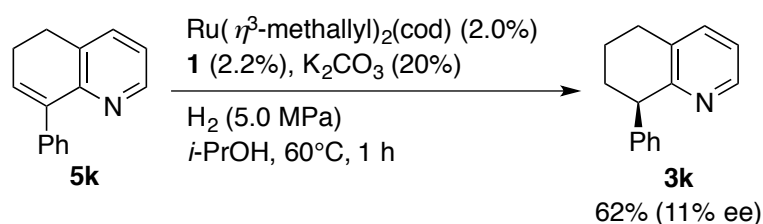

The procedure B for the asymmetric hydrogenation was followed with use of **5k** (51.6 mg, 0.25 mmol). The reaction was conducted in *i*-PrOH at 60°C for 1 h. The  $^1\text{H}$  NMR analysis of the resulting mixture was indicated that 40% of **5k** was remained. The crude product was purified with a flash column chromatography on silica gel (EtOAc/hexane = 1/5) to give **3k** (32.2 mg, 62%) as colorless oil.

The enantiomeric excess of **3k** was determined to be 11% ee (–) by the HPLC analysis with Chiralcel OD-H (4.6 mm  $\phi$   $\times$  250 mm): 10% 2-propanol in hexane, 0.5 mL/min flow, at 35°C, UV 268 nm detection.

### Deuteration of **2i** (eq 4).

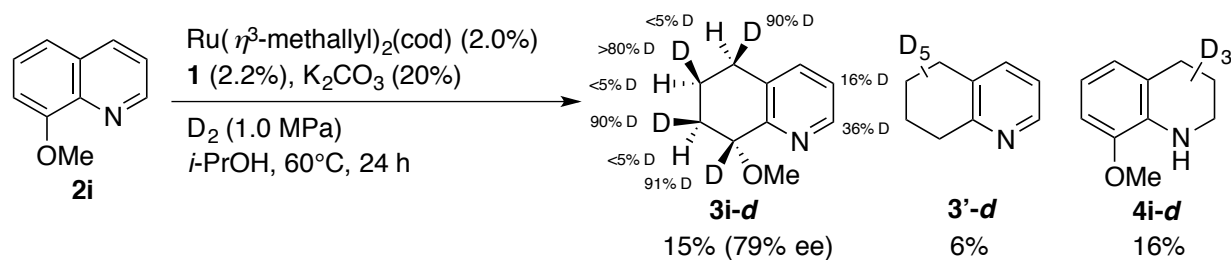

The procedure B for the asymmetric hydrogenation was followed with use of **2i** (40.0 mg, 0.25 mmol). The reaction was conducted in *i*-PrOH at 60°C under 1.0 MPa of  $\text{D}_2$  for 24 h. The  $^1\text{H}$  NMR analysis of the resulting mixture was indicated that it contained **2i** in 61%, **3i-d** in 15%, **3'-d** in 6%, and **4i-d** in 16%. The crude product was purified with a flash column chromatography on silica gel (EtOAc/hexane = 1/1) to give **3i-d** (1.5 mg, 4%) as colorless oil. The  $^1\text{H}$  NMR spectrum of **3i-d** is given in Figure S-51. The methoxy group was used as the internal standard for calibrating the integration of each peak. In the recovered starting material, deuterium was incorporated at the 2-position in 57%.

The enantiomeric excess of **3i-d** was determined to be 79% ee (+) by the HPLC analysis with Chiralcel OD-H (4.6 mm  $\phi$   $\times$  250 mm): 10% 2-propanol in hexane, 0.5 mL/min flow, at 35°C, UV 268 nm detection.

As shown in Scheme S-1, the hydrogenation of **2i** was carried out under the above condition to compare the deuteration with the hydrogenation. The resulting mixture contains 87% ee of **3i** in 60% and **3'** in 40%. The substrate **2i** was completely consumed without formation of **4i**.

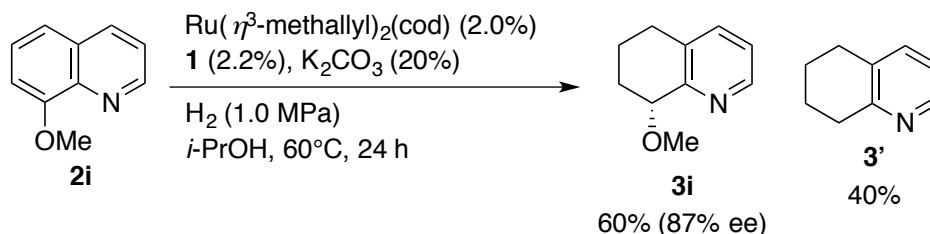

**Scheme S-1.** The hydrogenation of **2i** under 1.0 MPa of H<sub>2</sub>.

## References

- (1) Schrock, R. R.; Johnson, B. F. G.; Lewis, J. J. *Chem. Soc., Dalton Trans.* **1974**, 951.
- (2) (a) Sawamura, M.; Hamashima, H.; Sugawara, M.; Kuwano, R.; Ito, Y. *Organometallics* **1995**, *14*, 4549. (b) Kuwano, R.; Sawamura, M. In *Catalysts for Fine Chemical Synthesis, Volume 5: Regio- and Stereo-Controlled Oxidations and Reductions*, Roberts, S. M.; Whittall, J., Eds.; John Wiley & Sons: West Sussex, 2007; p 73.
- (3) Kuwano, R.; Kashiwabara, M. *Org. Lett.* **2006**, *8*, 2653.
- (4) Li, H.-C.; Chou, P.-T.; Hu, Y.-H.; Cheng, Y.-M.; Liu, R.-S. *Organometallics* **2005**, *24*, 1329.
- (5) Epszajn, J.; Bieniek, A. *J. Chem. Soc., Perkin Trans. 1* **1985**, 213.
- (6) Ackermann, L.; Althammer, A. *Org. Lett.* **2006**, *8*, 3457.
- (7) Kwak, J.; Kim, M.; Chang, S. *J. Am. Chem. Soc.* **2011**, *133*, 3780.
- (8) So, C. M.; Lau, C. P.; Chan, A. S.; Kwong, F. Y. *J. Org. Chem.* **2008**, *73*, 7731.
- (9) Kaiser, S.; Smidt, S. P.; Pfaltz, A. *Angew. Chem. Int. Ed.* **2006**, *45*, 5194.
- (10) Skupinska, K. A.; McEachern, E. J.; Skerlj, R. T.; Bridger, G. J. *J. Org. Chem.* **2002**, *67*, 7890.
- (11) Hönel, M.; Vierhapper, F. W. *Monatsh. Chem.* **1984**, *115*, 1219.
- (12) Ishii, T. *Yakugaku Zasshi* **1952**, *72*, 1317.
- (13) Hönel, M.; Vierhapper, F. W. *J. Chem. Soc., Perkin Trans. 1* **1980**, 1933.
- (14) Gundersen, L.-L.; Benneche, T.; Undheim, K.; Legendziewicz, J.; Kierkegaard, P. *Acta Chem. Scand.* **1989**, *43*, 706.

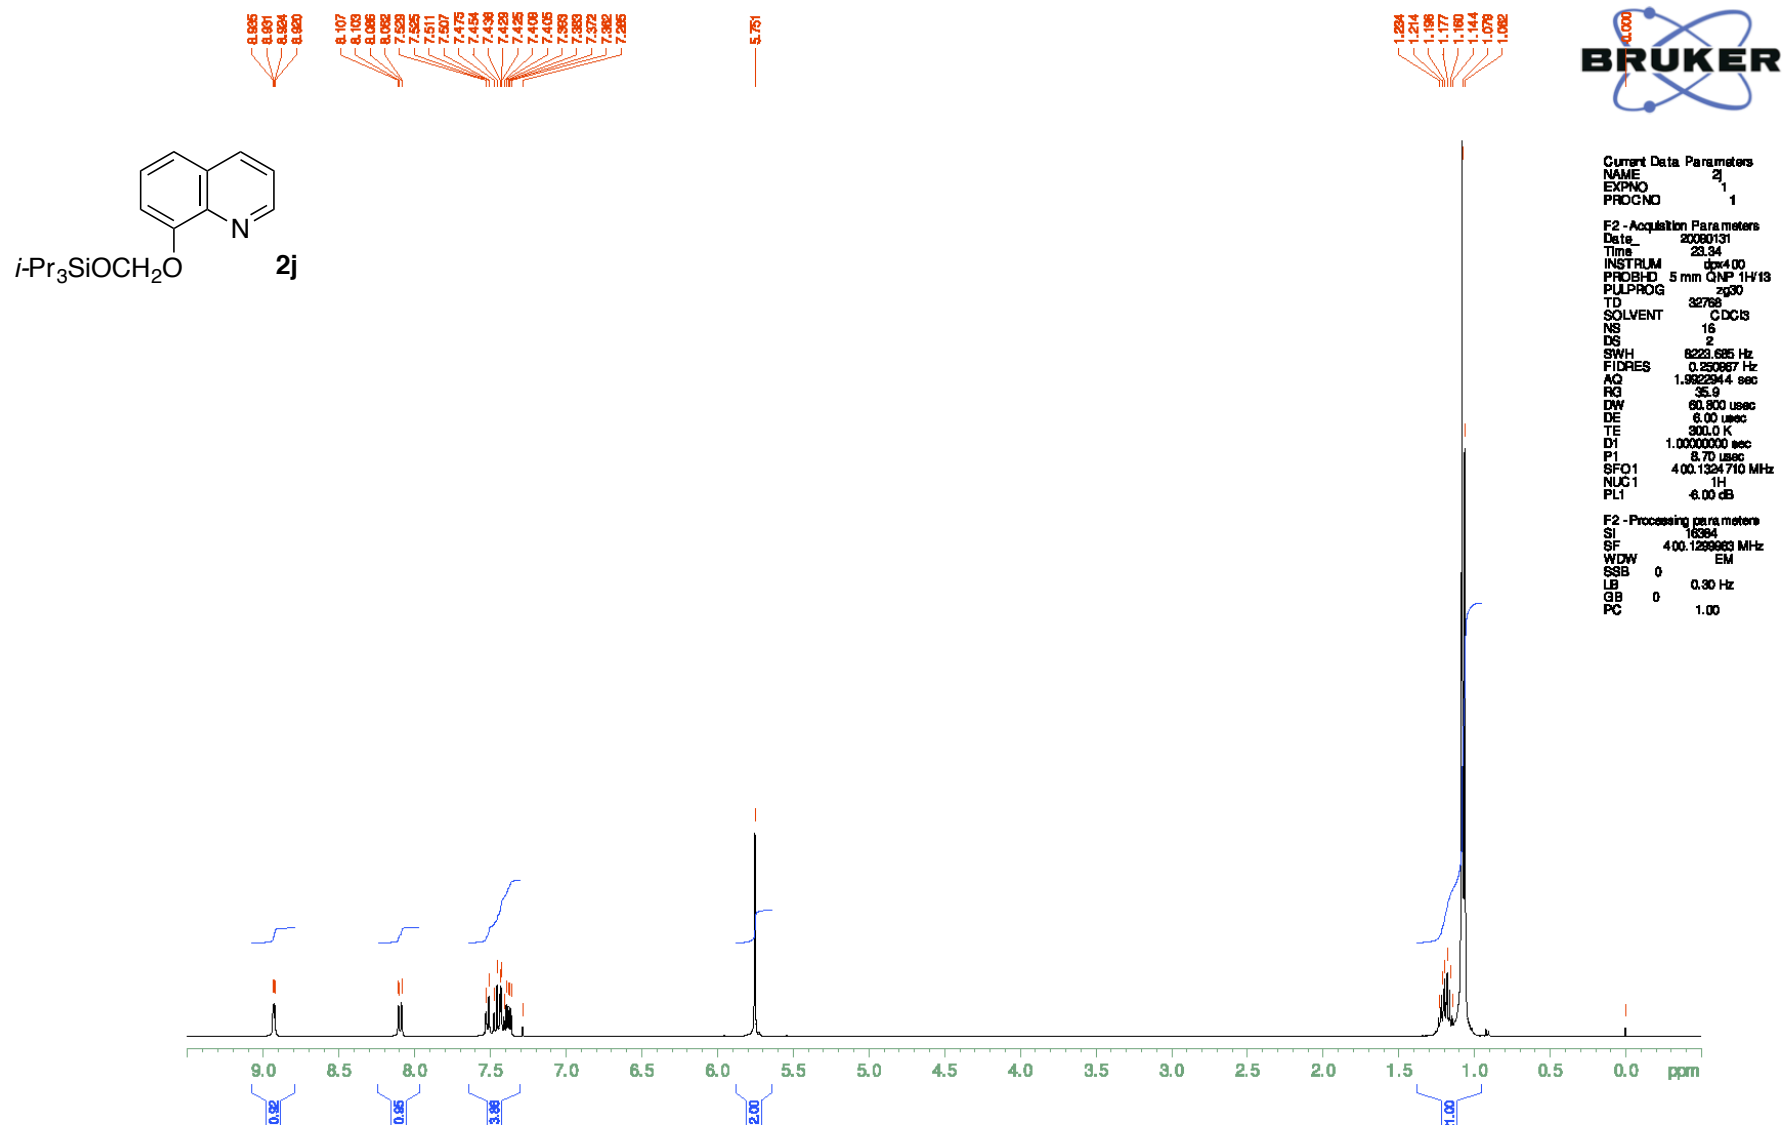

Figure S-1. <sup>1</sup>H NMR spectrum (CDCl<sub>3</sub>) of **2j**.

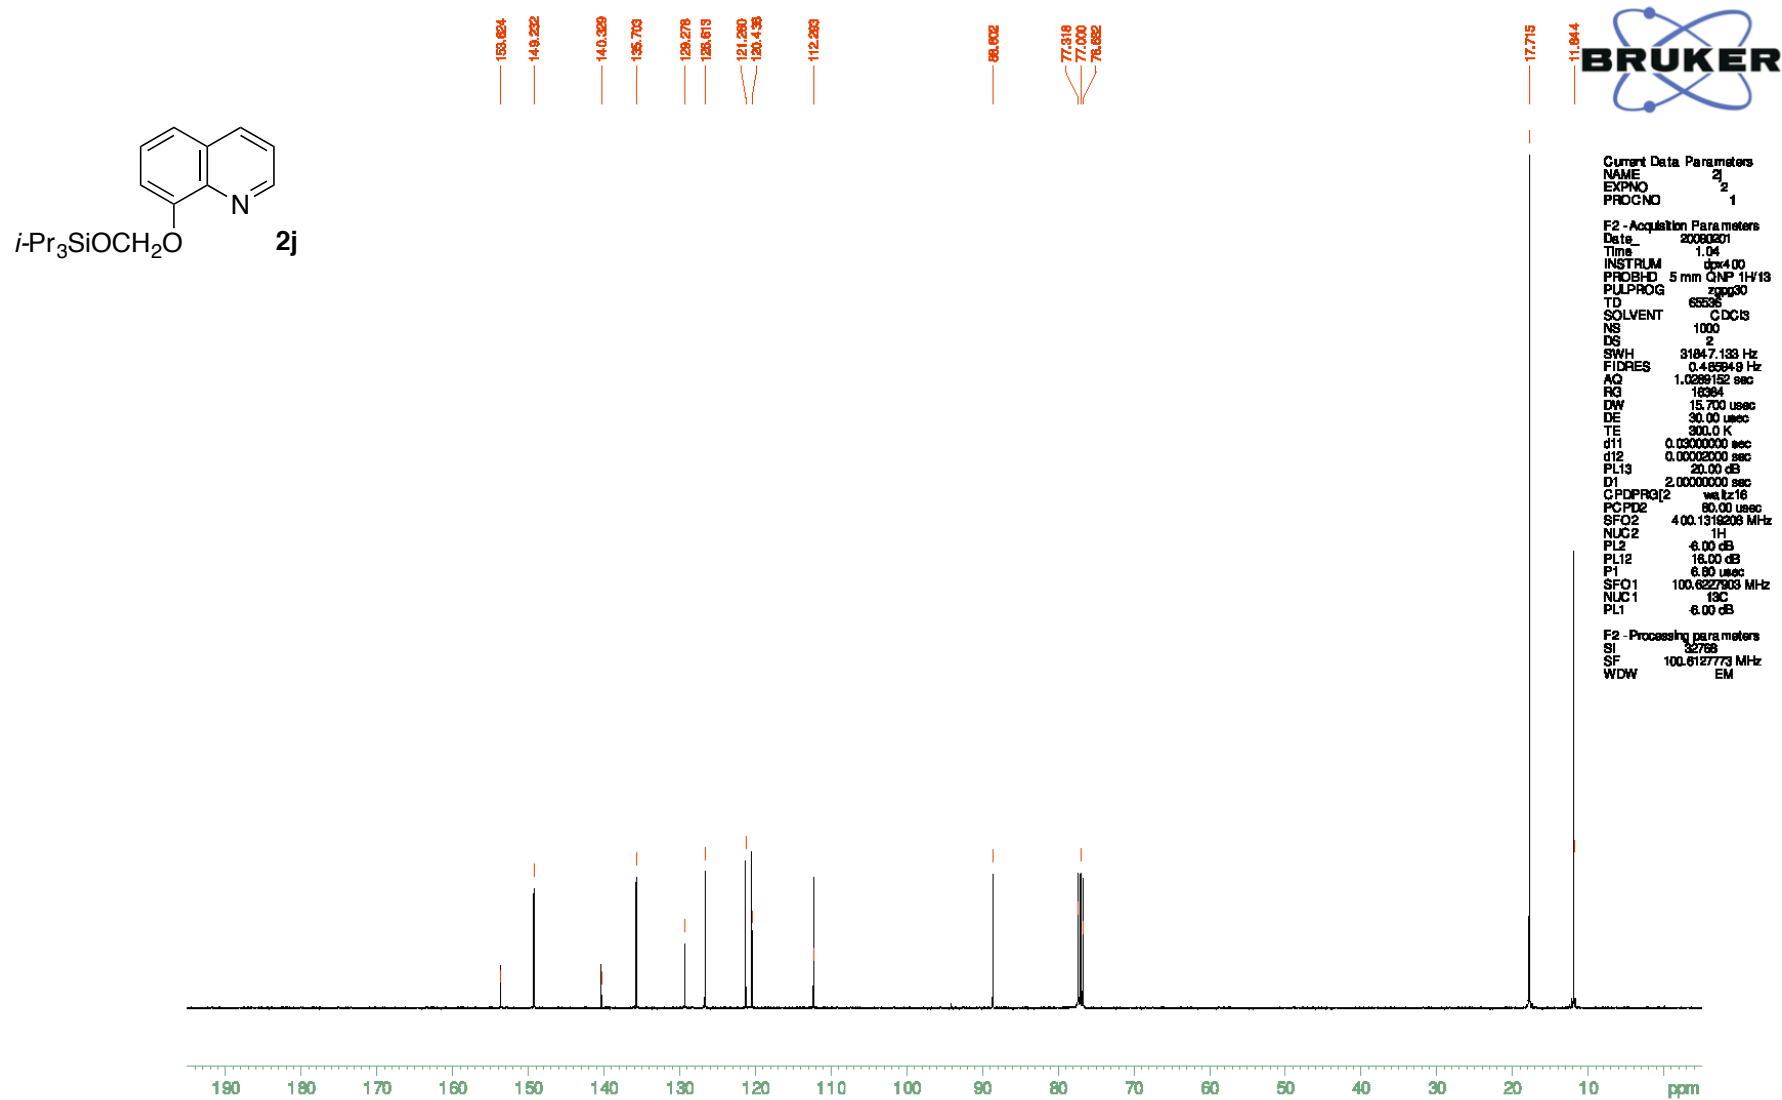

**Figure S-2.**  $^{13}\text{C} \{^1\text{H}\}$  NMR spectrum ( $\text{CDCl}_3$ ) of **2j**.

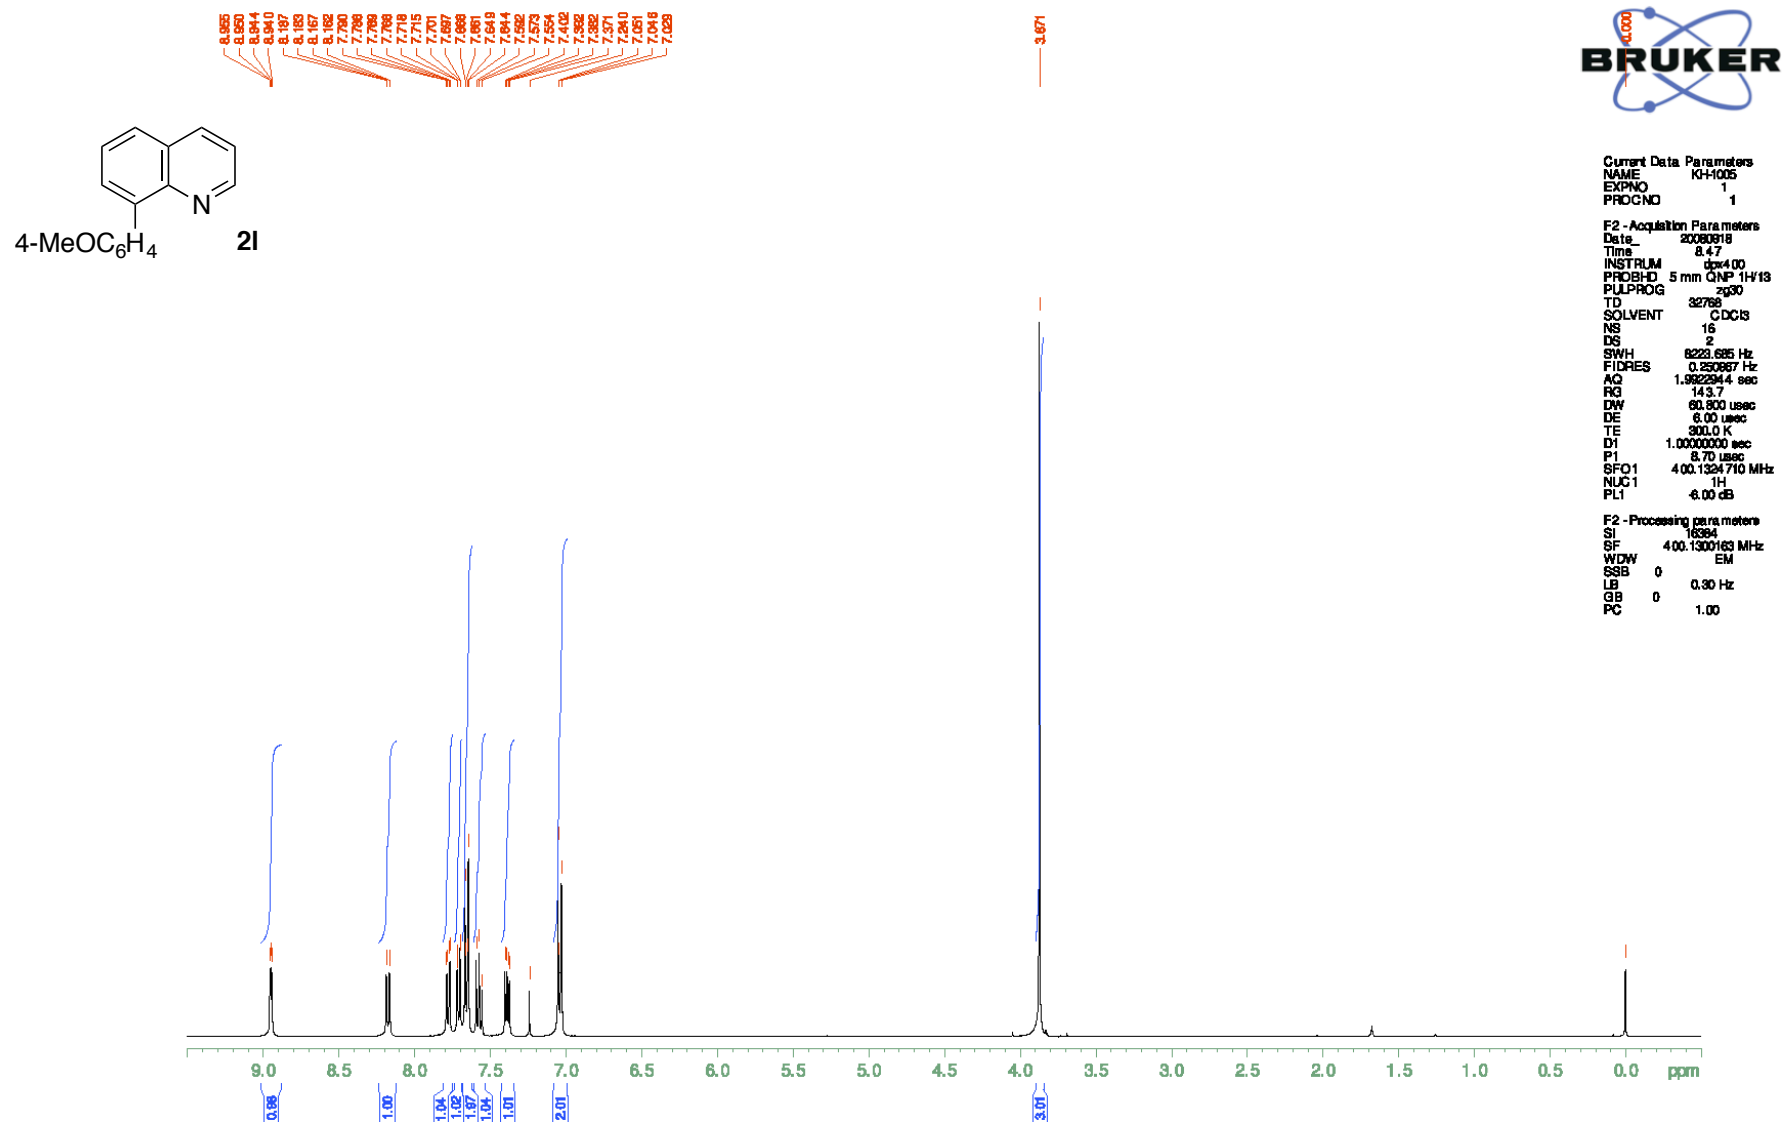

Figure S-3. <sup>1</sup>H NMR spectrum (CDCl<sub>3</sub>) of 2I.

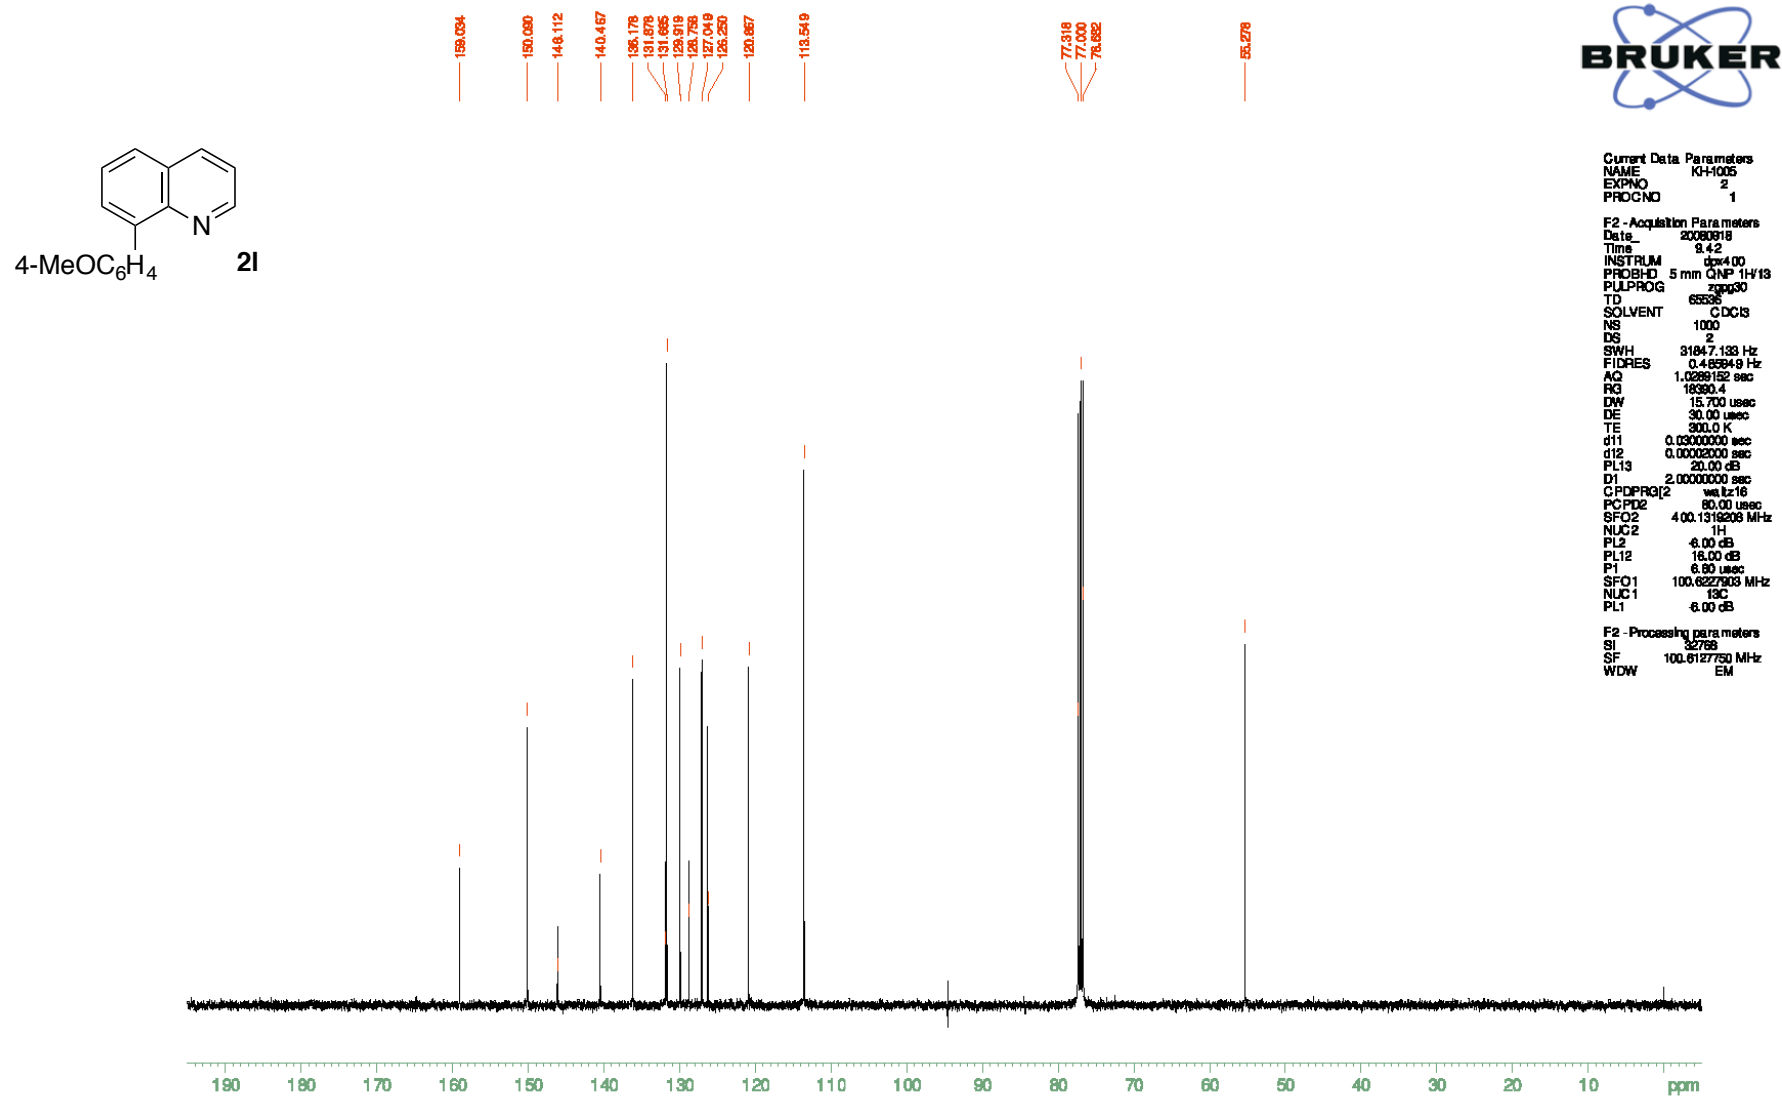

Figure S-4. <sup>13</sup>C {<sup>1</sup>H} NMR spectrum (CDCl<sub>3</sub>) of 2I.



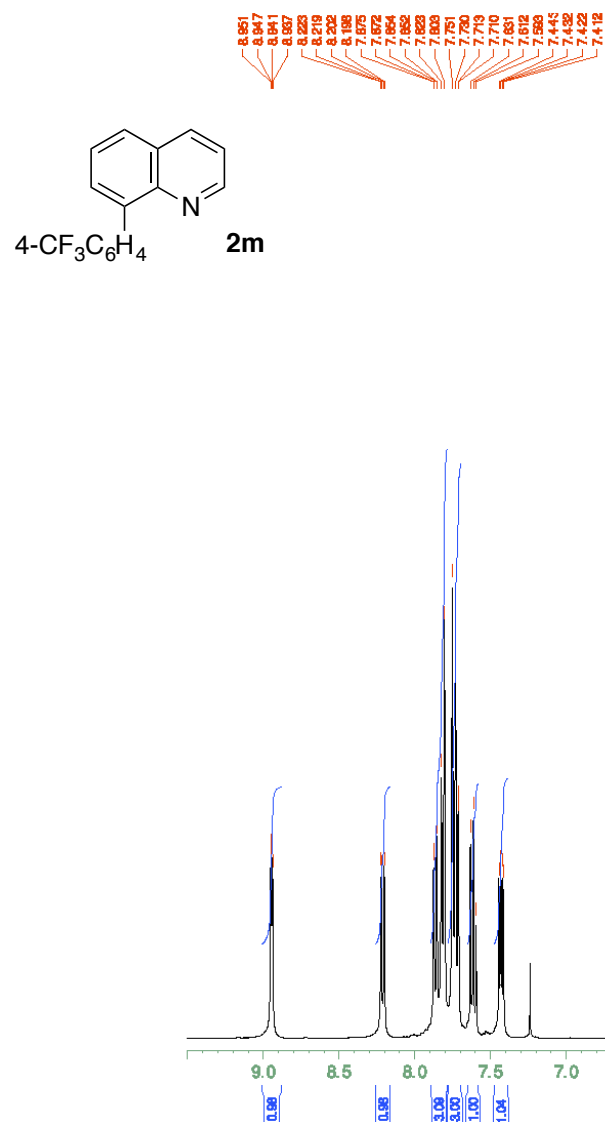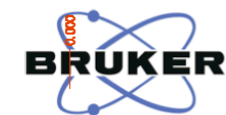

Current Data Parameters  
NAME 2m  
EXPNO 1  
PROCNO 1

F2 - Acquisition Parameters  
Date\_ 20080817  
Time 14.15  
INSTRUM dpx400  
PROBHD 5 mm QNP 1H/13  
PULPROG zg30  
TD 32768  
SOLVENT CDCl3  
NS 16  
DS 2  
SWH 8223.685 Hz  
FIDRES 0.25067 Hz  
AQ 1.9922944 sec  
RG 128  
DW 60.500 usec  
DE 6.00 usec  
TE 300.0 K  
D1 1.0000000 sec  
P1 8.70 usec  
SFO1 400.1324710 MHz  
NUC1 1H  
PL1 0.00 dB

F2 - Processing parameters  
SI 16384  
SF 400.1300174 MHz  
WDW EM  
SSB 0  
LB 0.30 Hz  
GB 0  
PC 1.00

Figure S-5. <sup>1</sup>H NMR spectrum (CDCl<sub>3</sub>) of **2m**.

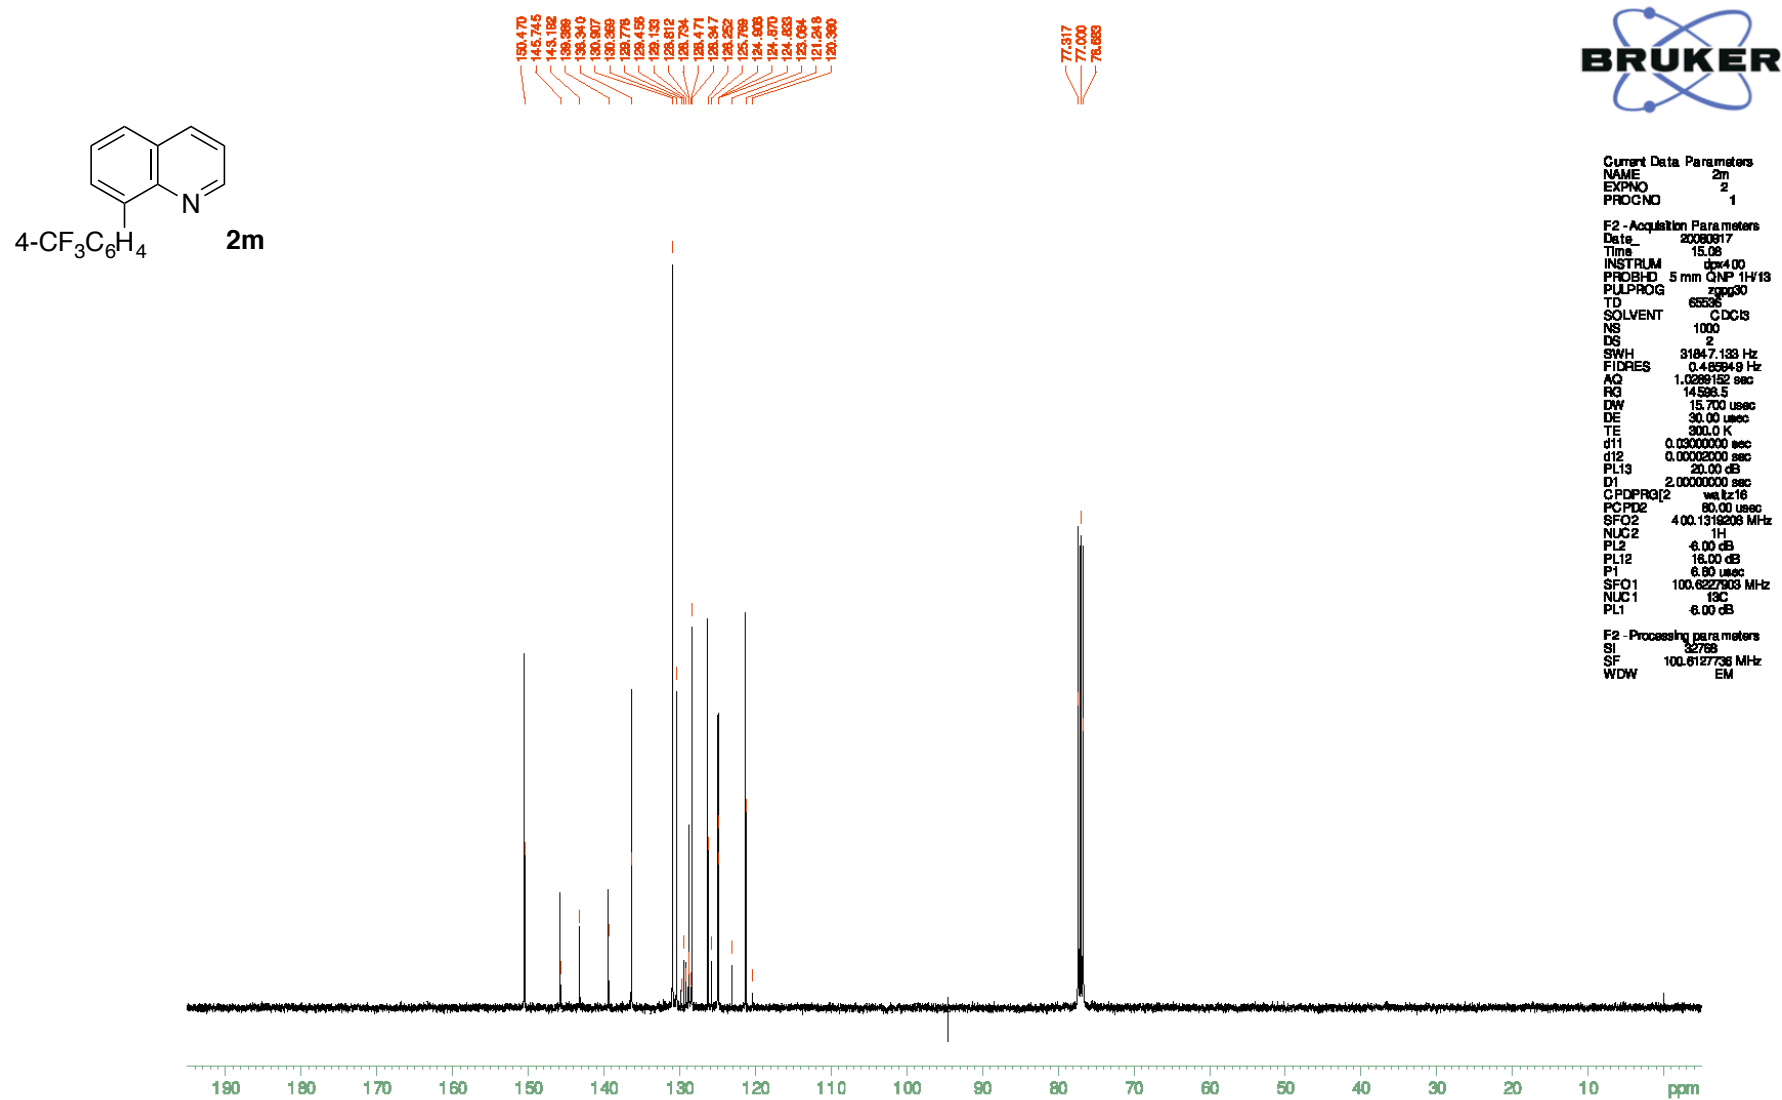

Figure S-6. <sup>13</sup>C {<sup>1</sup>H} NMR spectrum (CDCl<sub>3</sub>) of 2m.

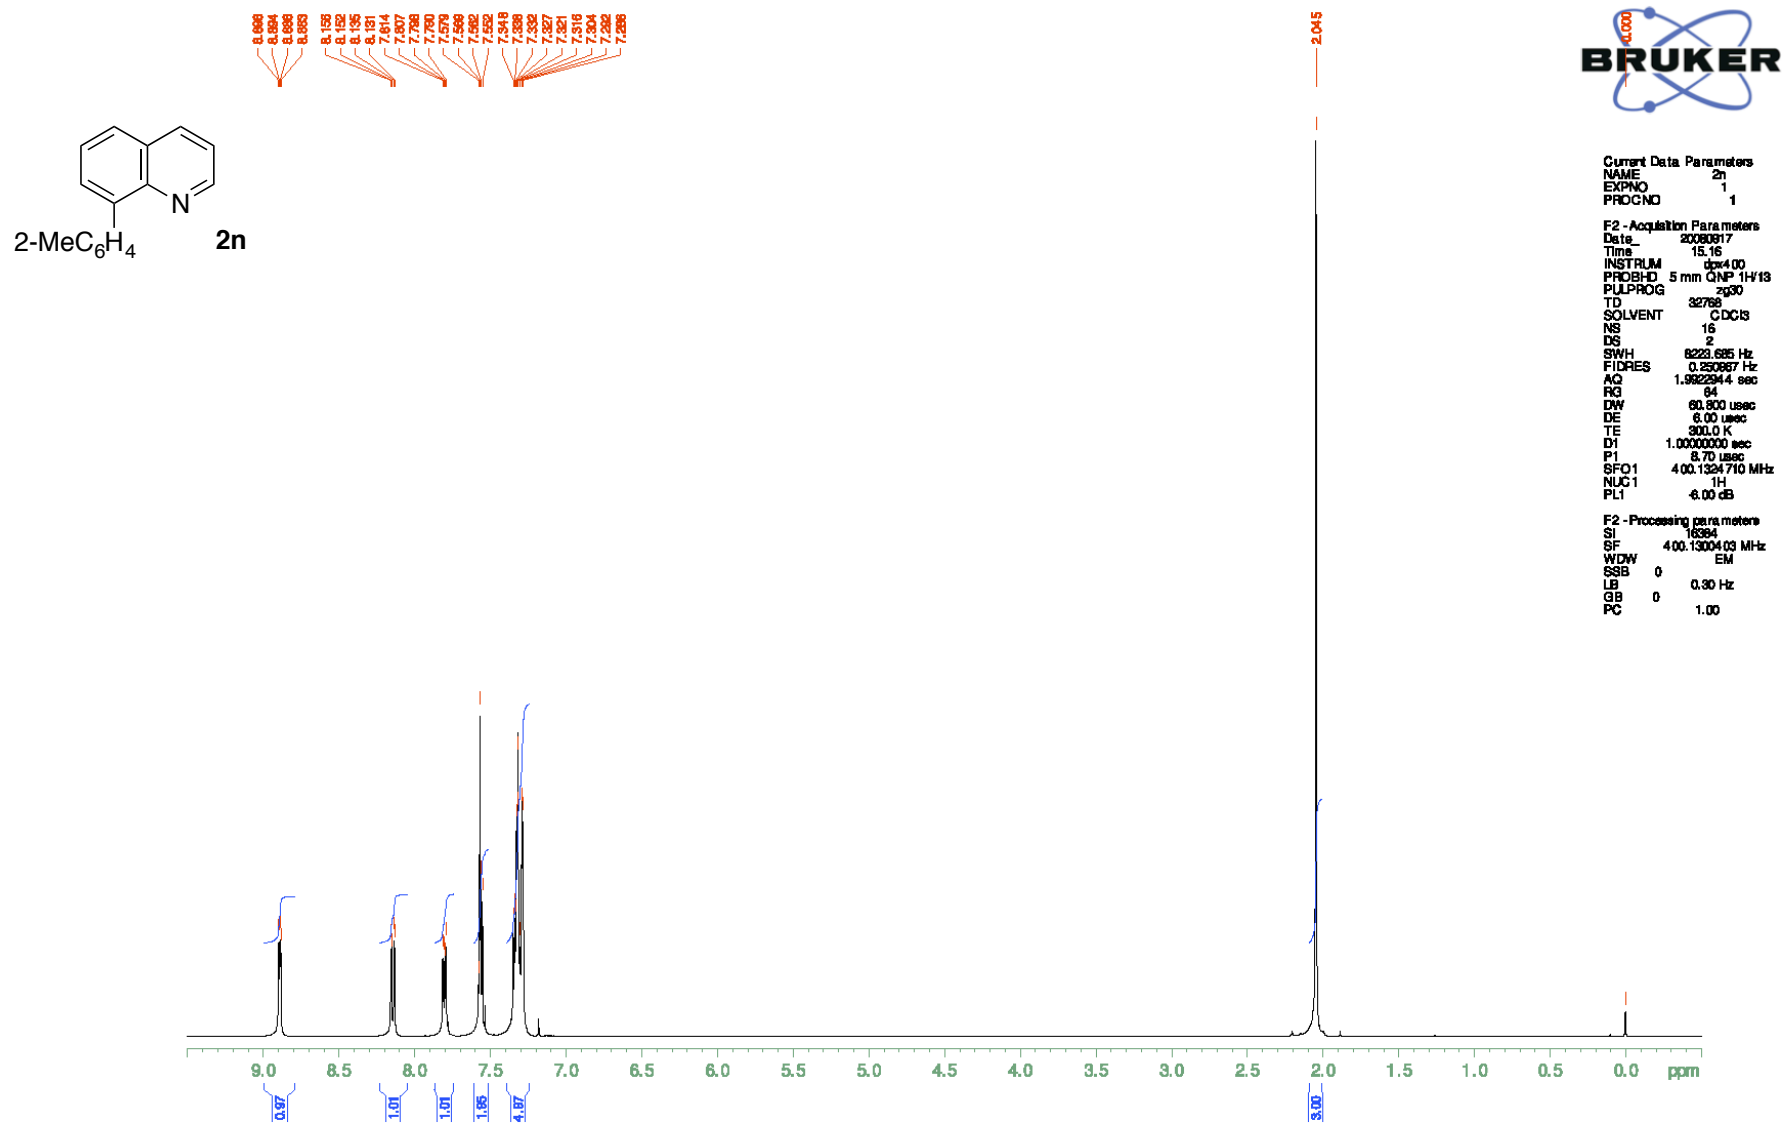

Figure S-7. <sup>1</sup>H NMR spectrum (CDCl<sub>3</sub>) of **2n**.

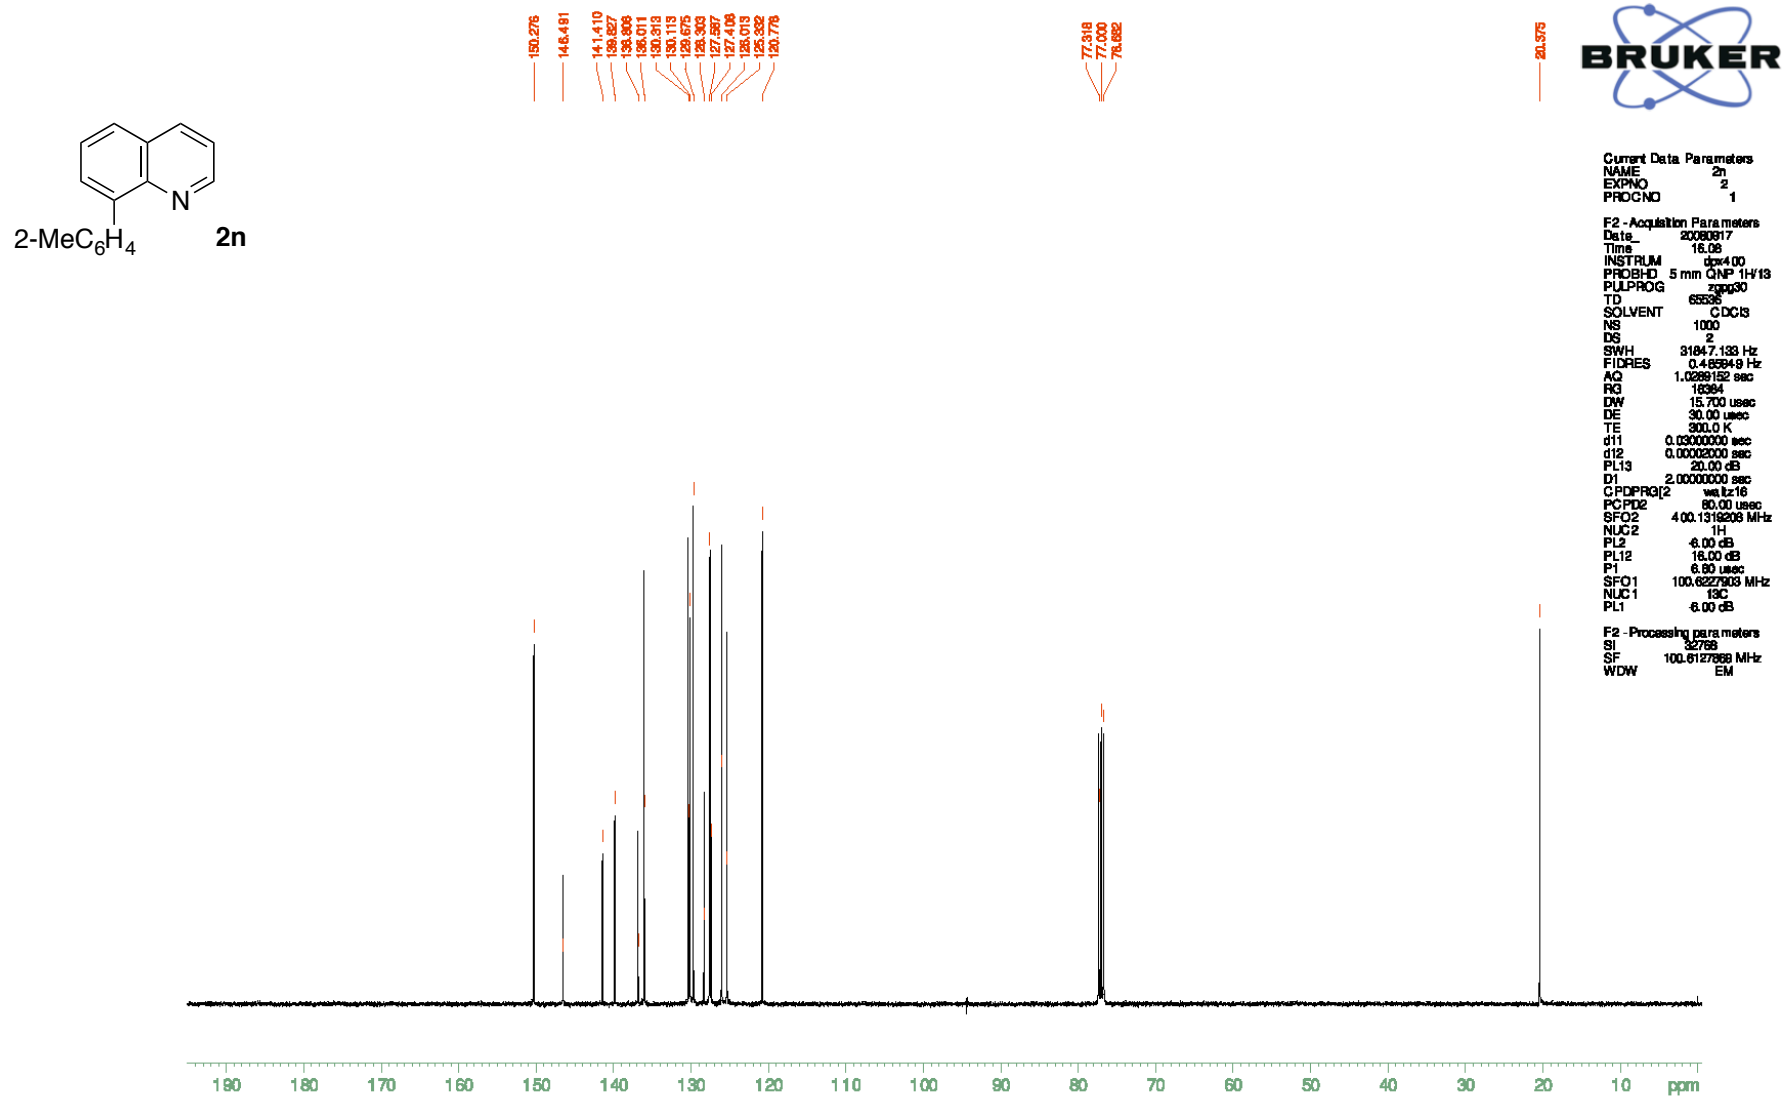

Figure S-8. <sup>13</sup>C {<sup>1</sup>H} NMR spectrum (CDCl<sub>3</sub>) of **2n**.

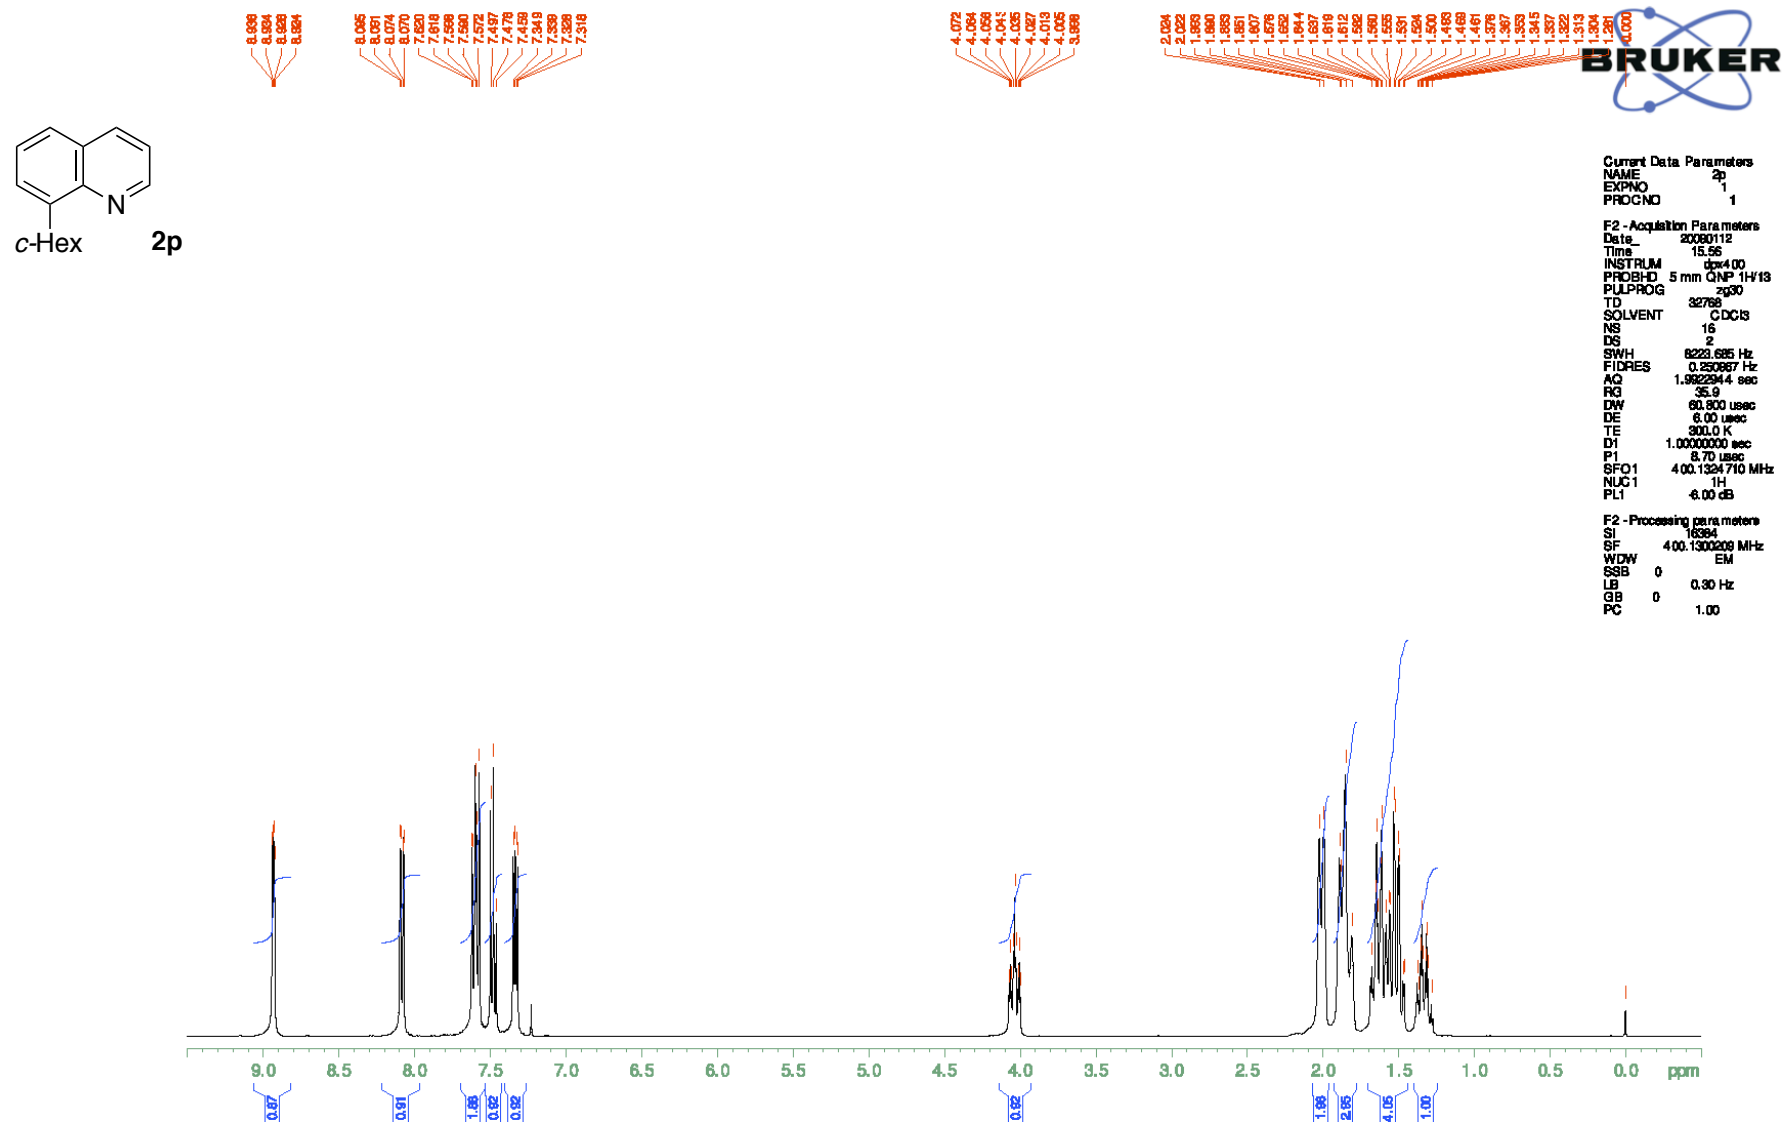

**Figure S-9.**  $^1\text{H}$  NMR spectrum ( $\text{CDCl}_3$ ) of **2p**.

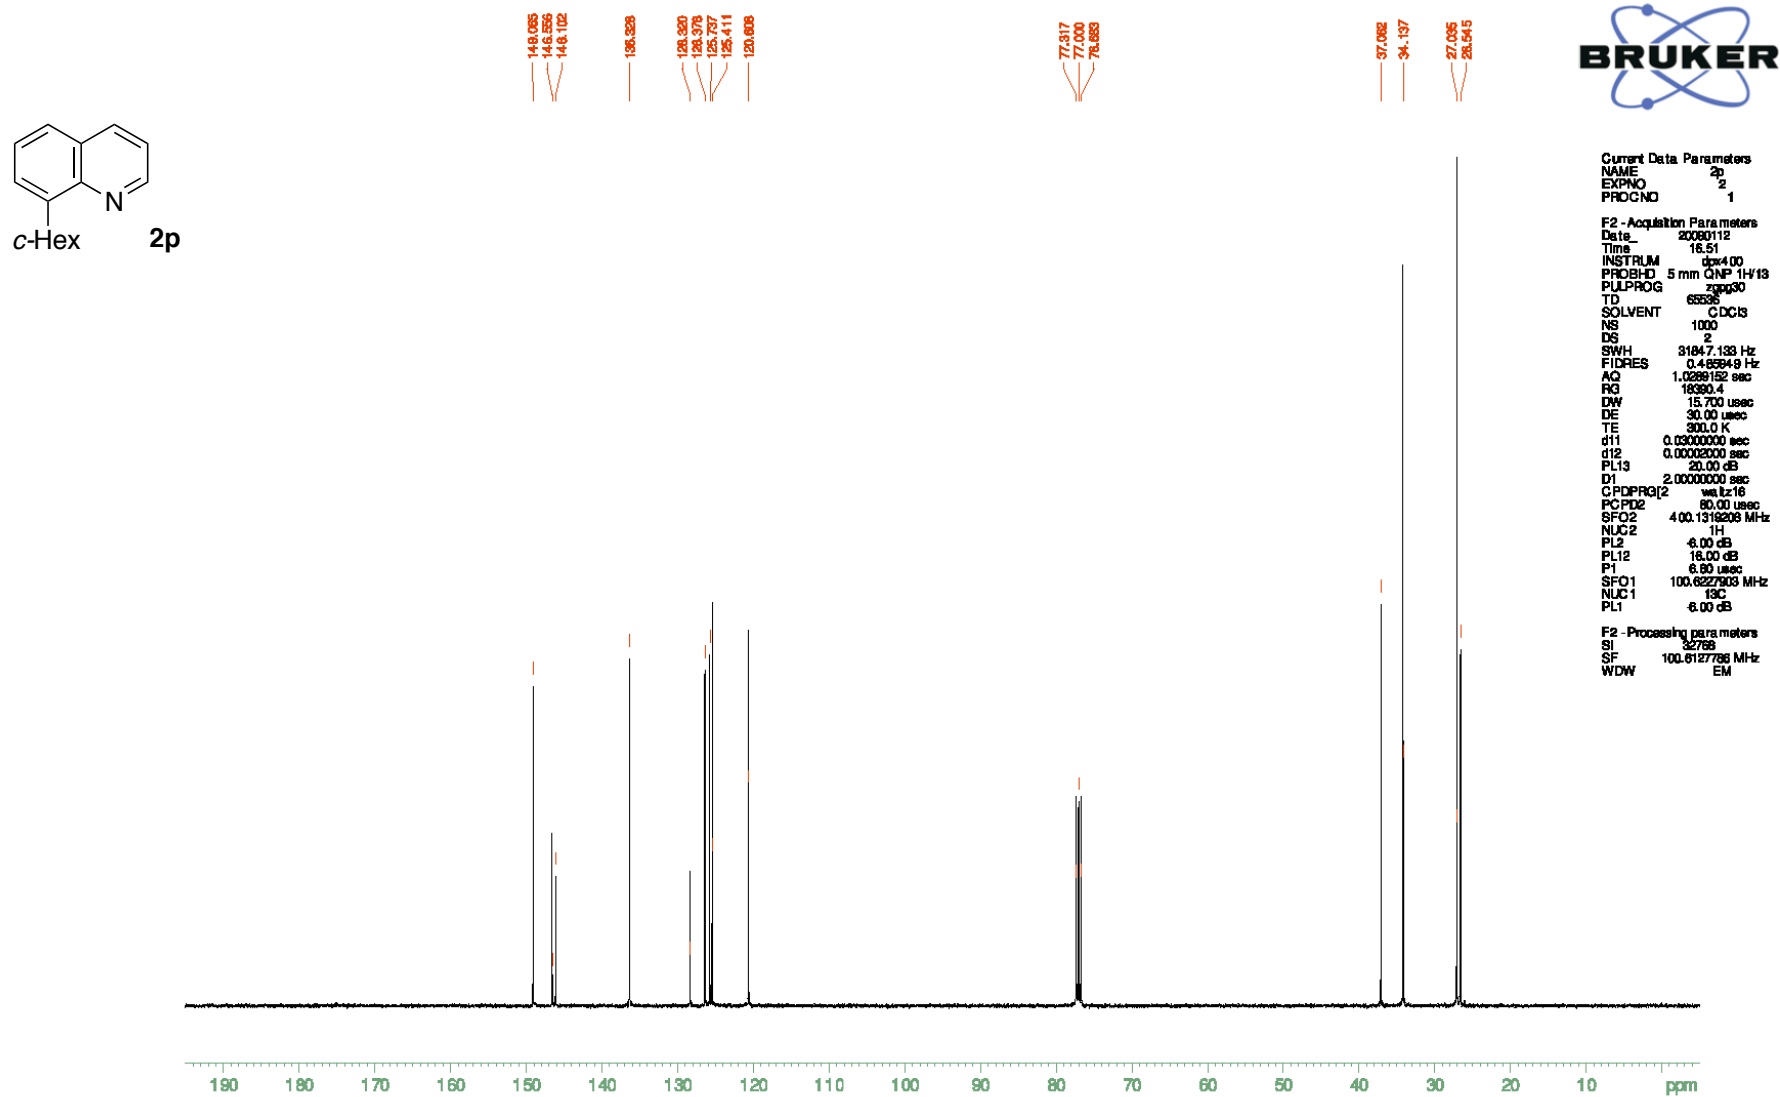

**Figure S-10.**  $^{13}\text{C} \{^1\text{H}\}$  NMR spectrum ( $\text{CDCl}_3$ ) of **2p**.

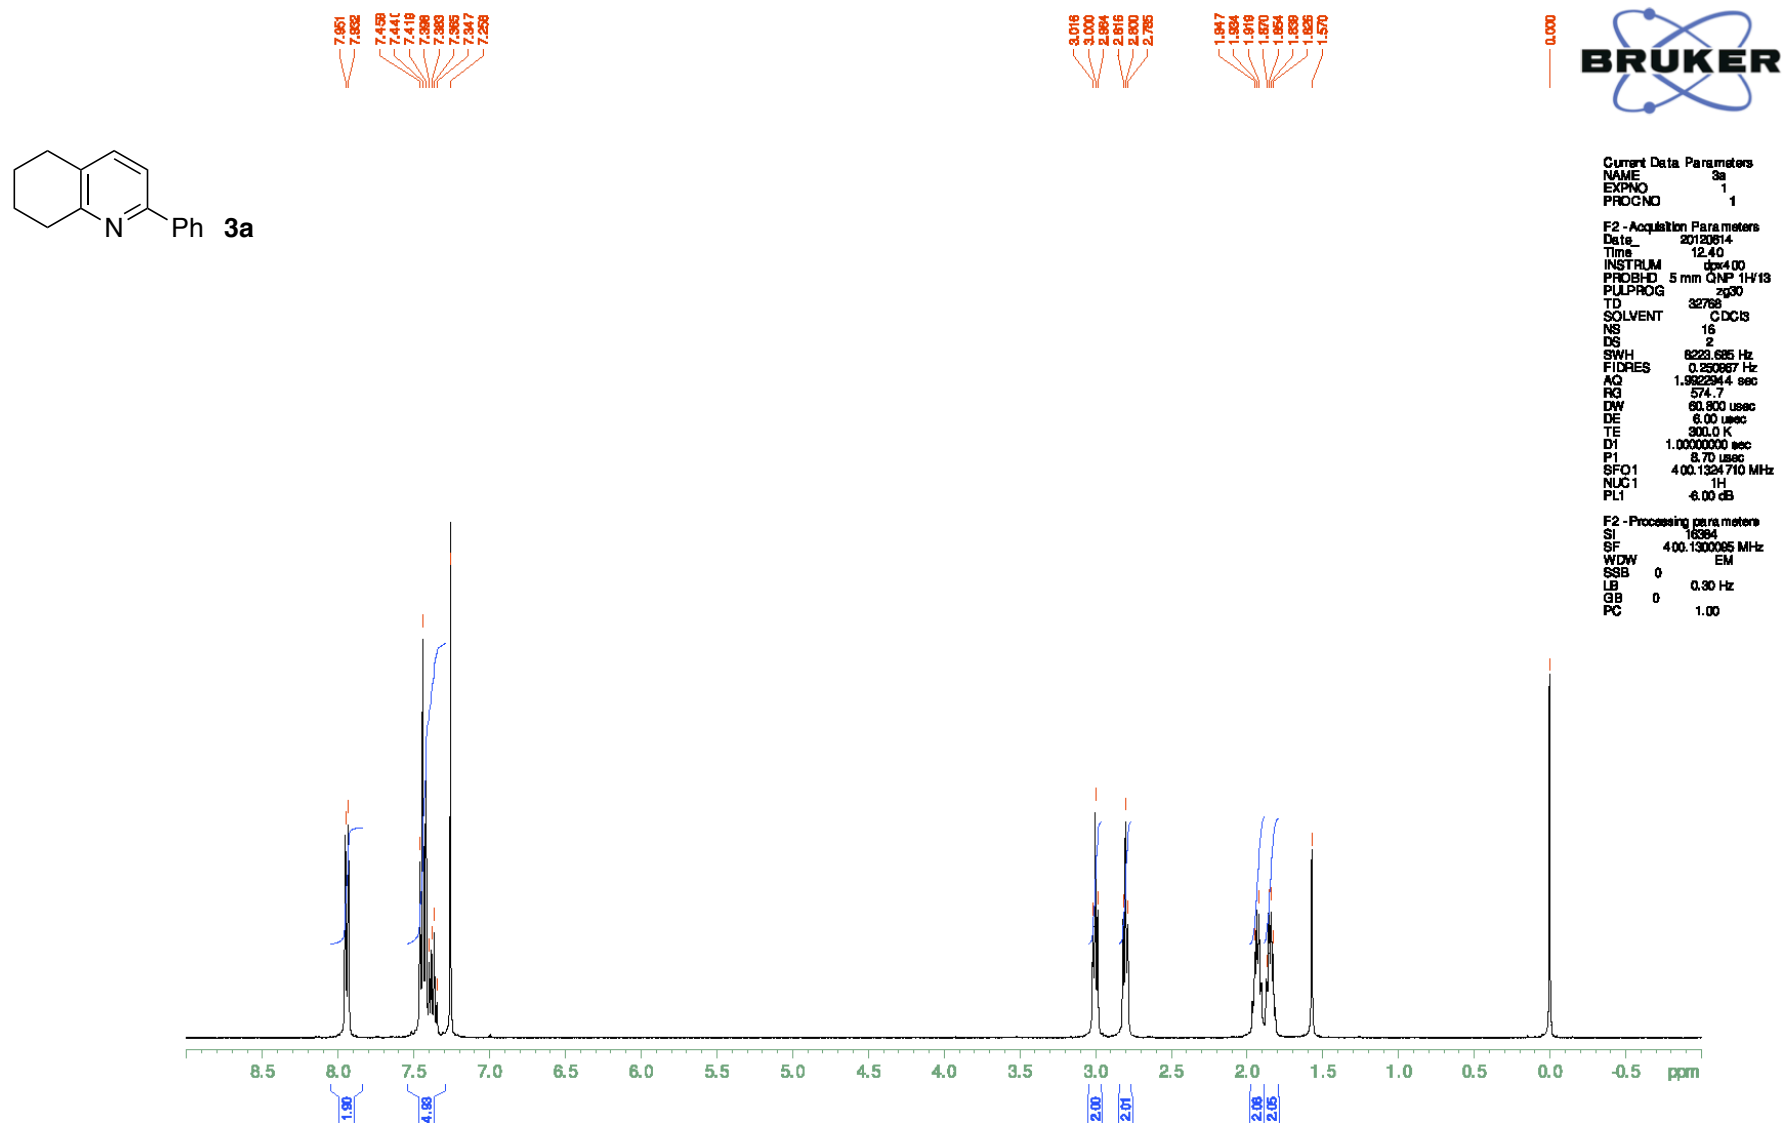

Figure S-11.  $^1\text{H}$  NMR spectrum ( $\text{CDCl}_3$ ) of **3a**.

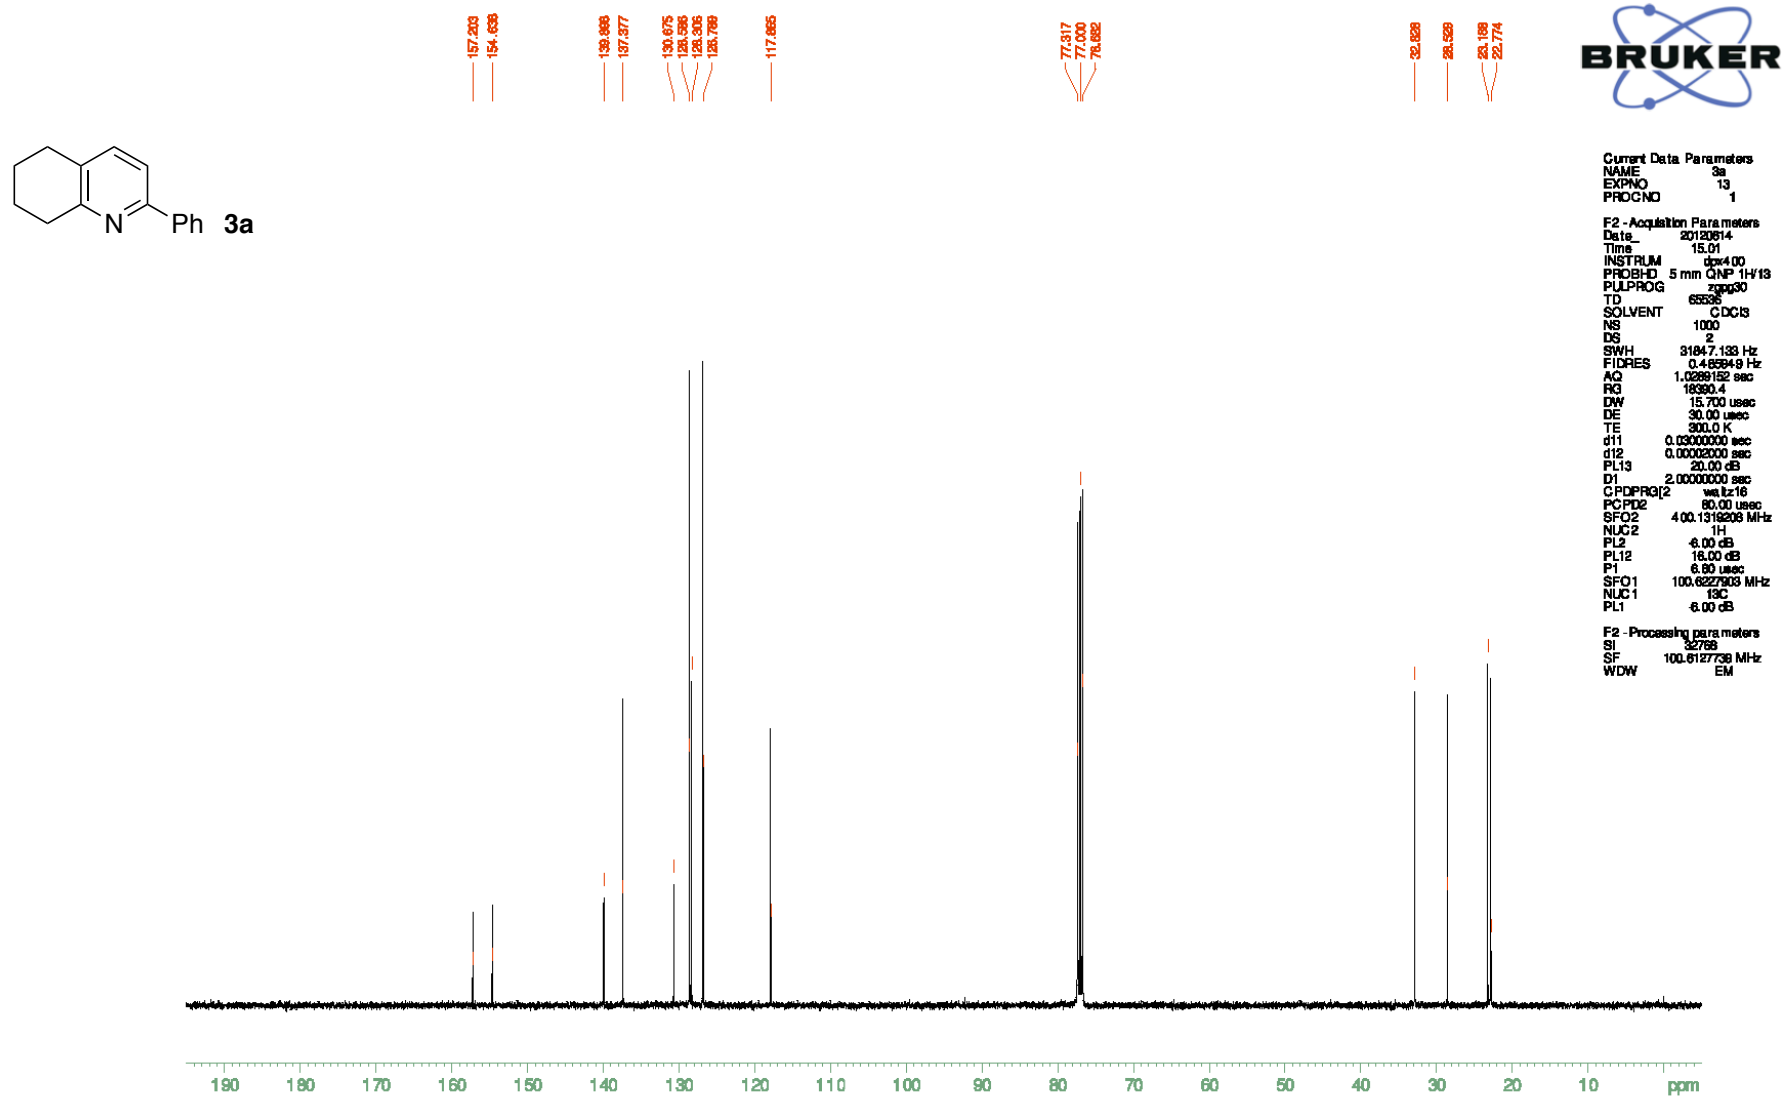

Figure S-12.  $^{13}\text{C} \{^1\text{H}\}$  NMR spectrum ( $\text{CDCl}_3$ ) of **3a**.



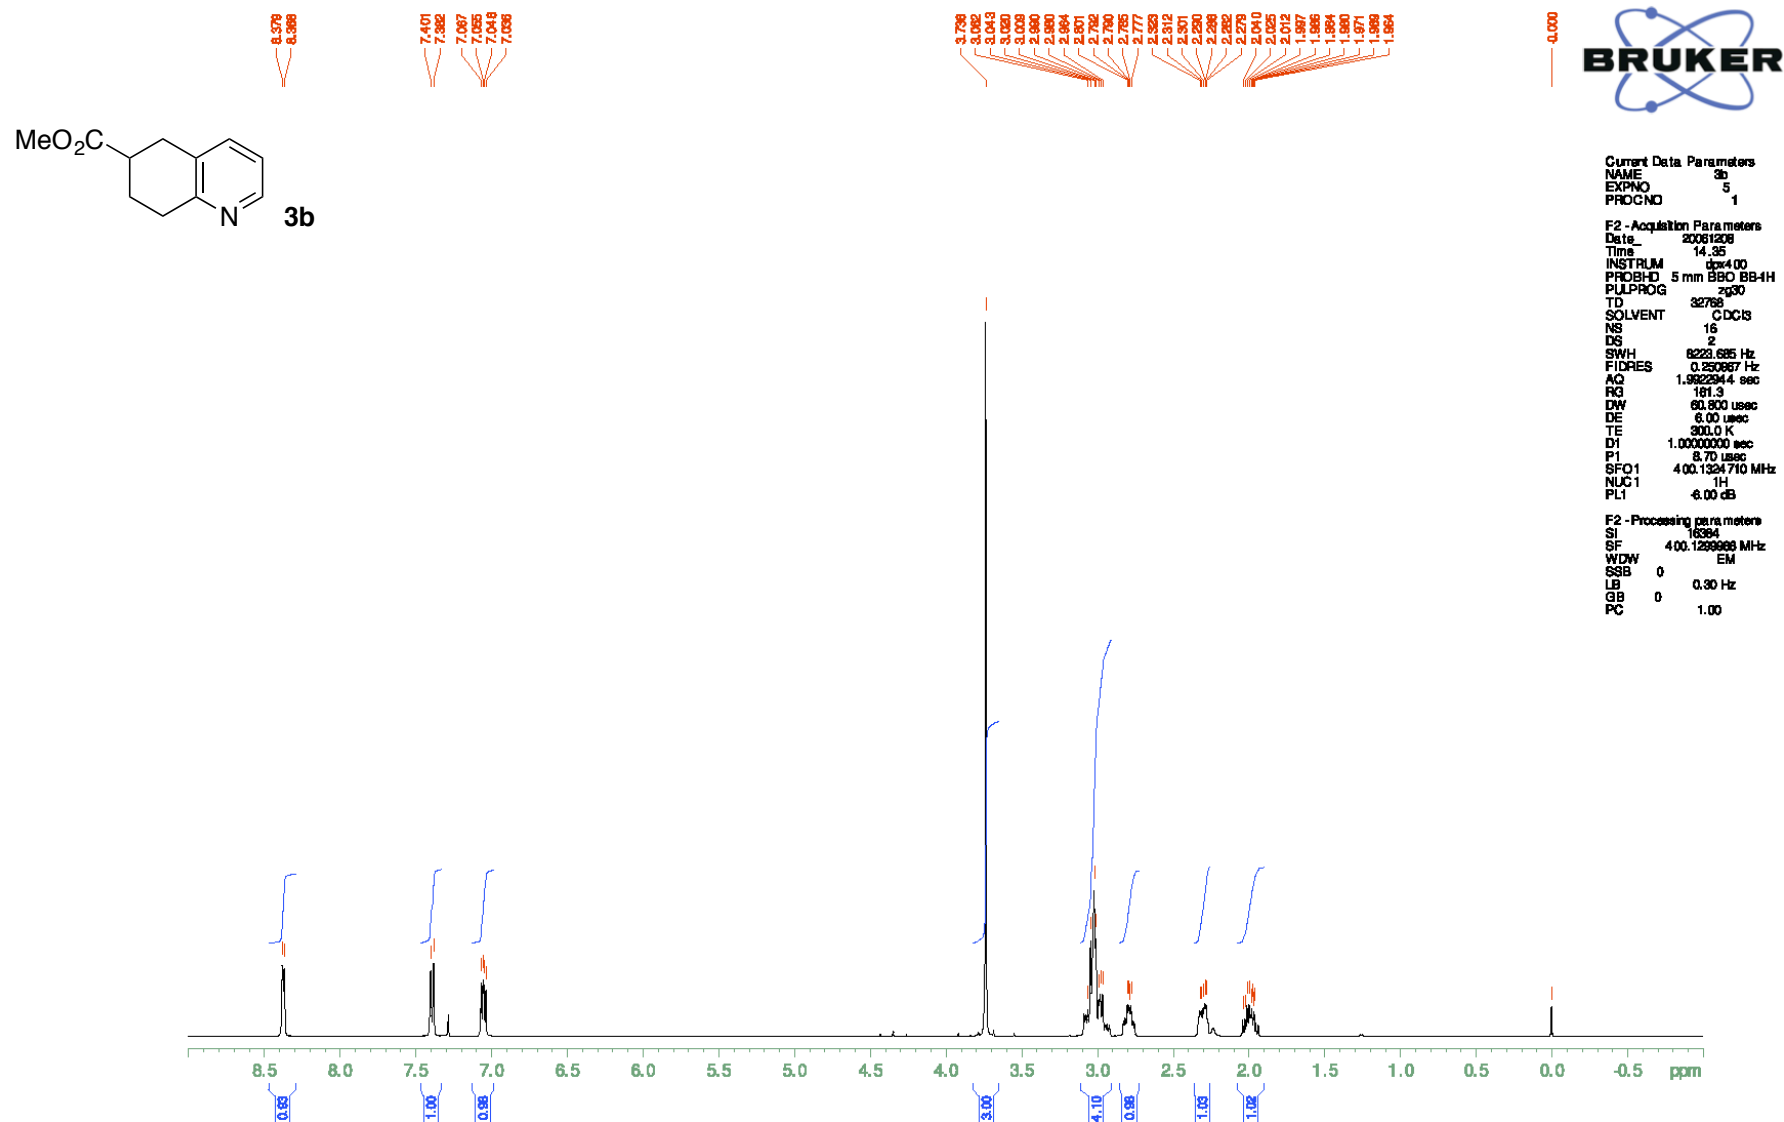

Figure S-13. <sup>1</sup>H NMR spectrum (CDCl<sub>3</sub>) of **3b**.

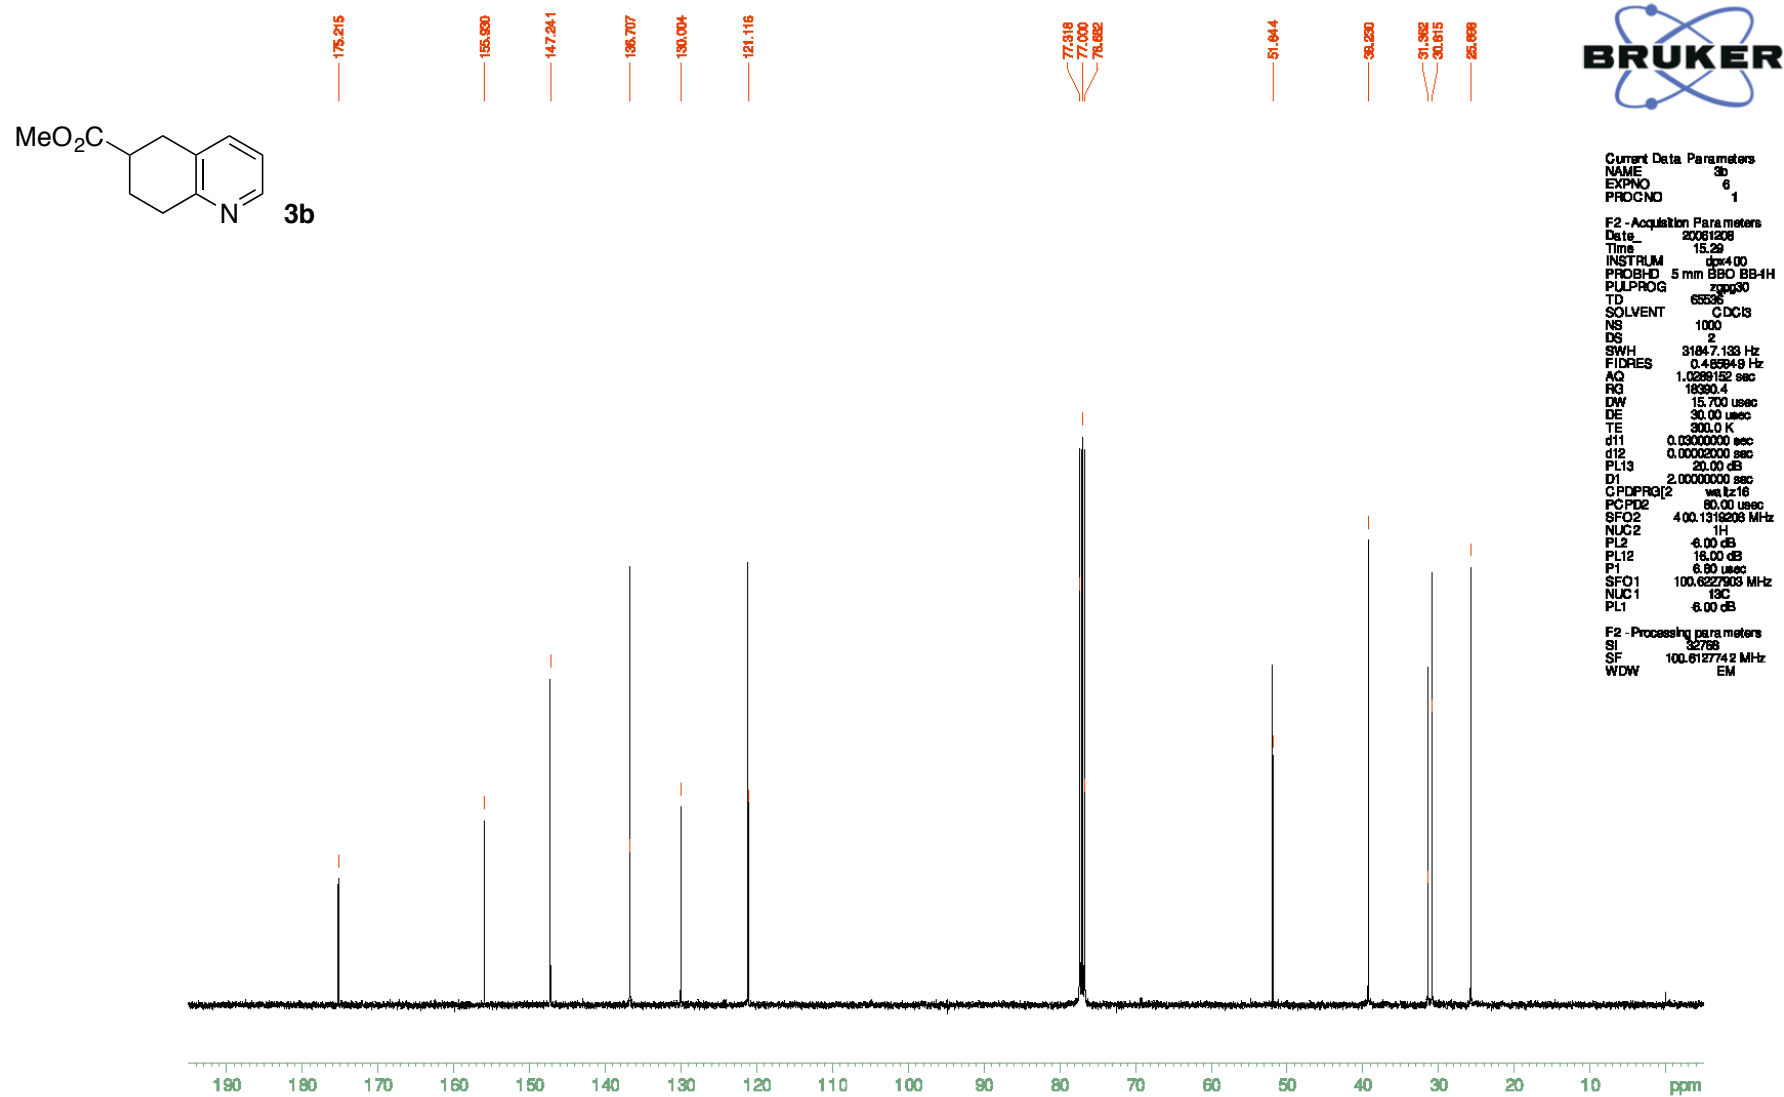

Figure S-14. <sup>13</sup>C {<sup>1</sup>H} NMR spectrum (CDCl<sub>3</sub>) of **3b**.

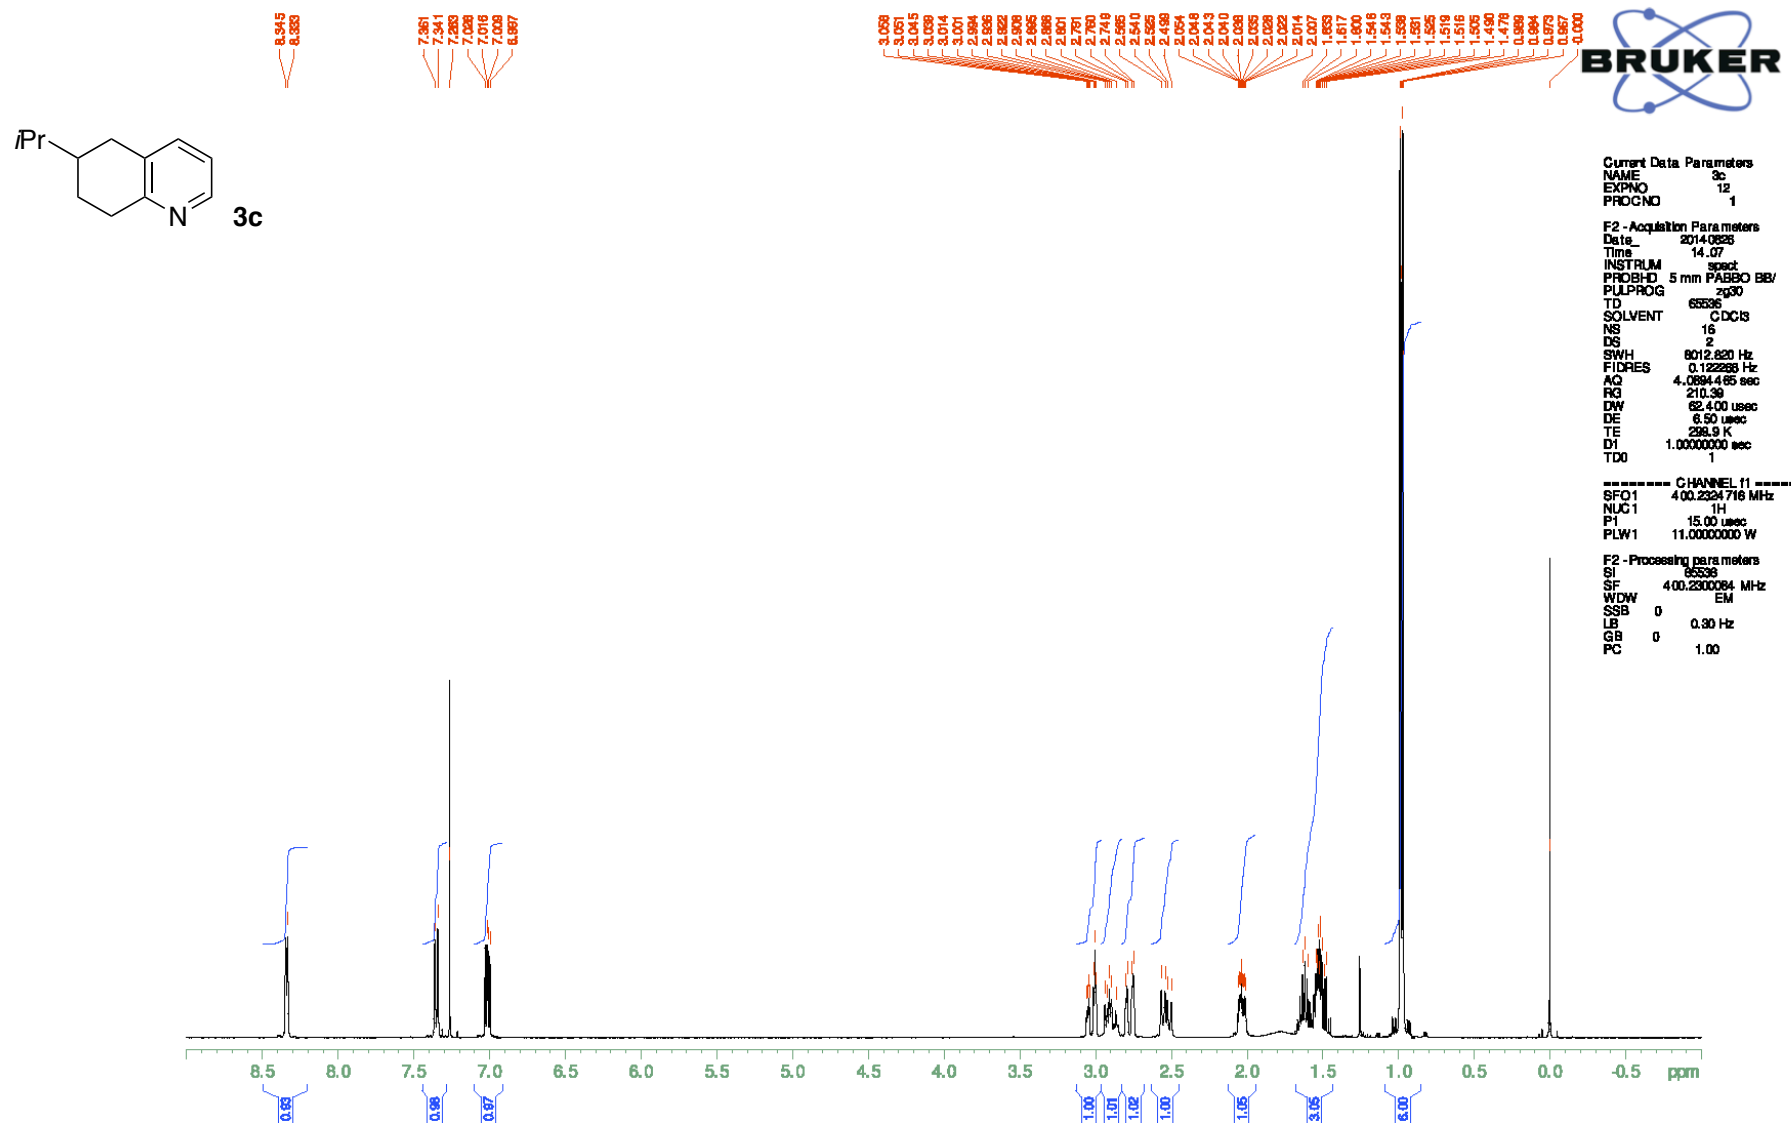

Figure S-15.  $^1\text{H}$  NMR spectrum ( $\text{CDCl}_3$ ) of **3c**.

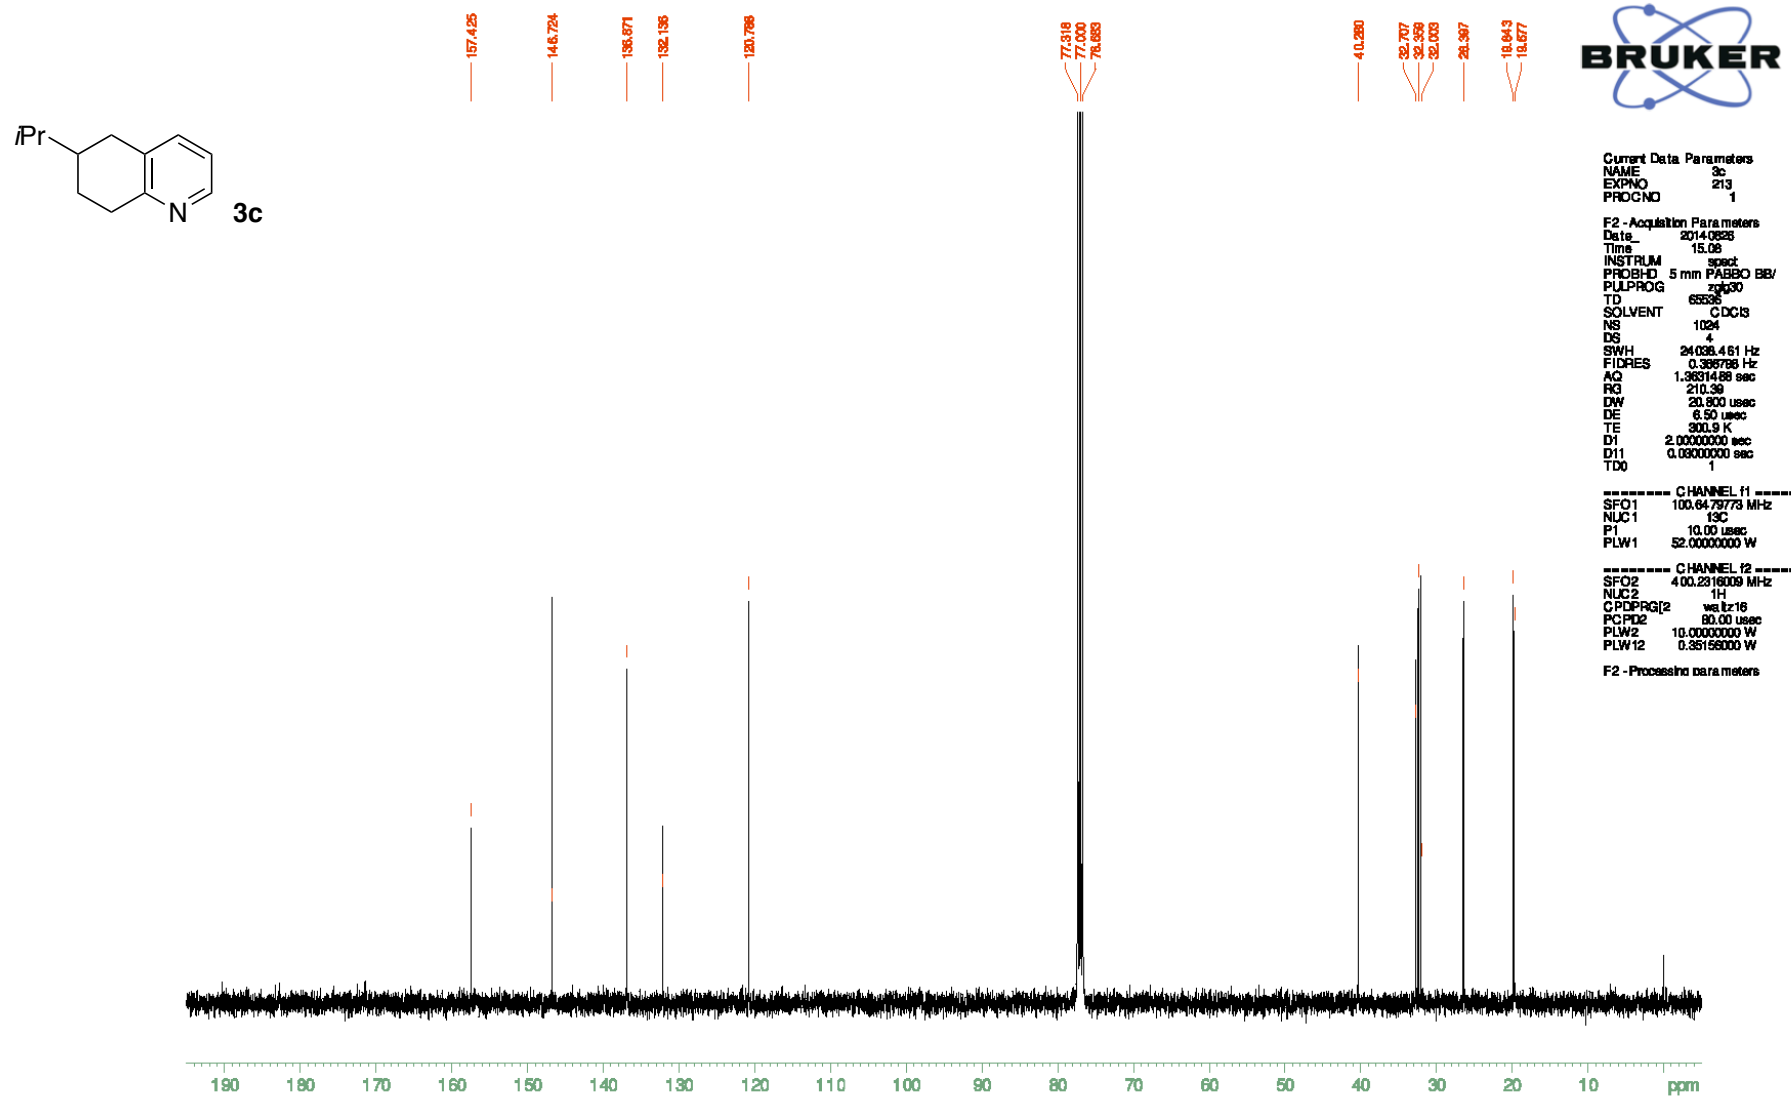

Figure S-16.  $^{13}\text{C} \{^1\text{H}\}$  NMR spectrum ( $\text{CDCl}_3$ ) of **3c**.

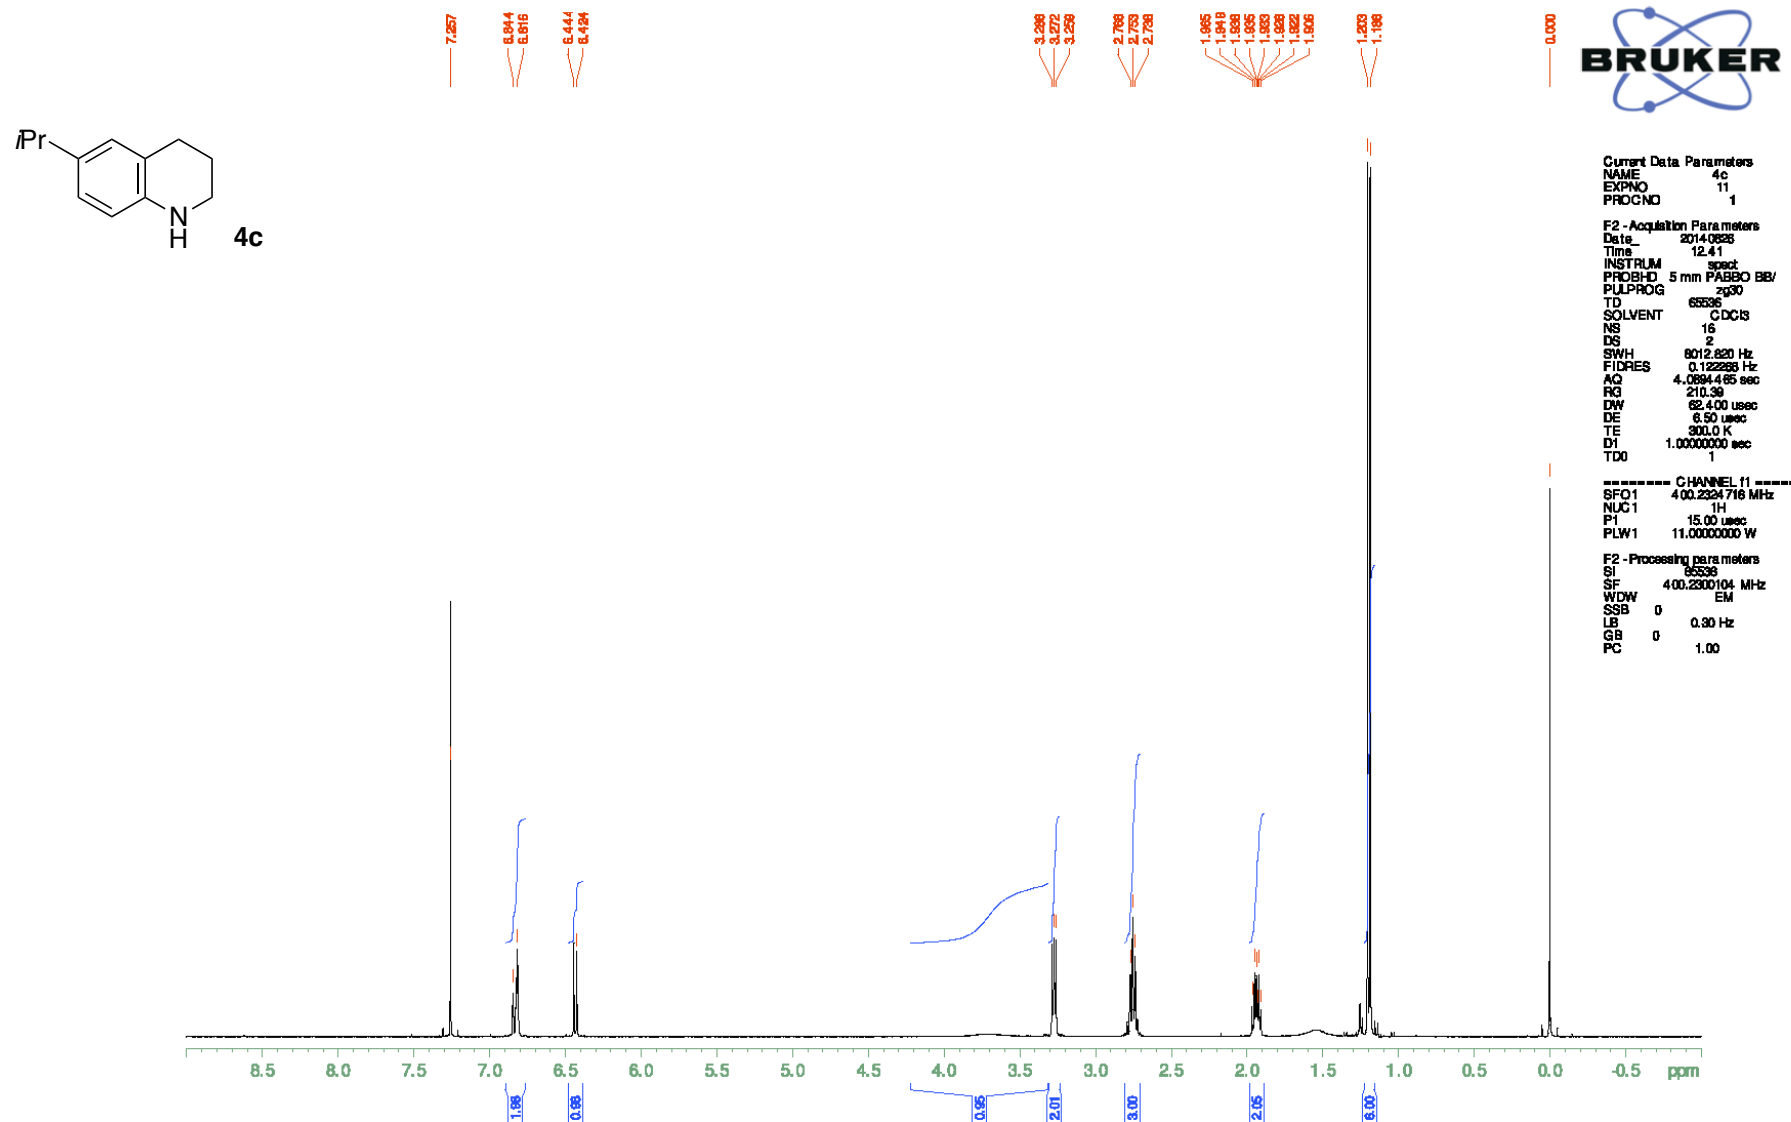

Figure S-17.  $^1\text{H}$  NMR spectrum ( $\text{CDCl}_3$ ) of **4c**.

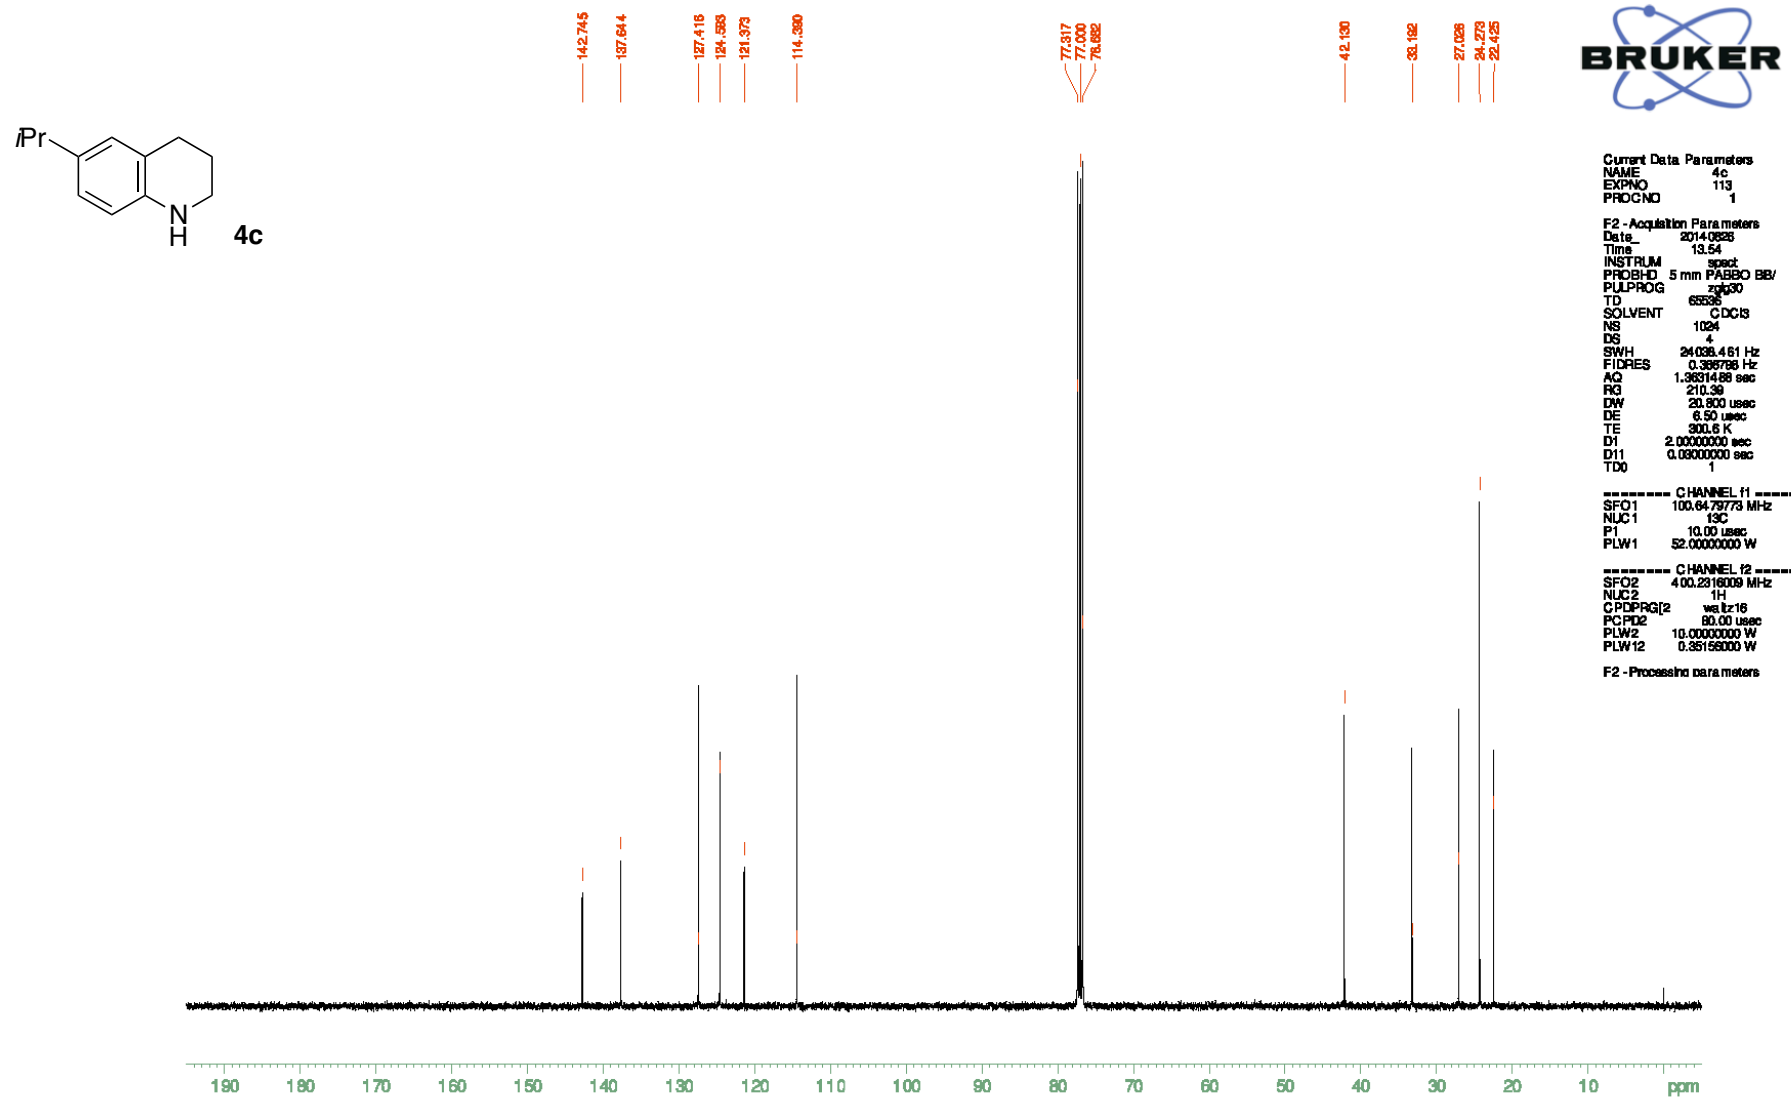

Figure S-18.  $^{13}\text{C} \{^1\text{H}\}$  NMR spectrum ( $\text{CDCl}_3$ ) of **4c**.

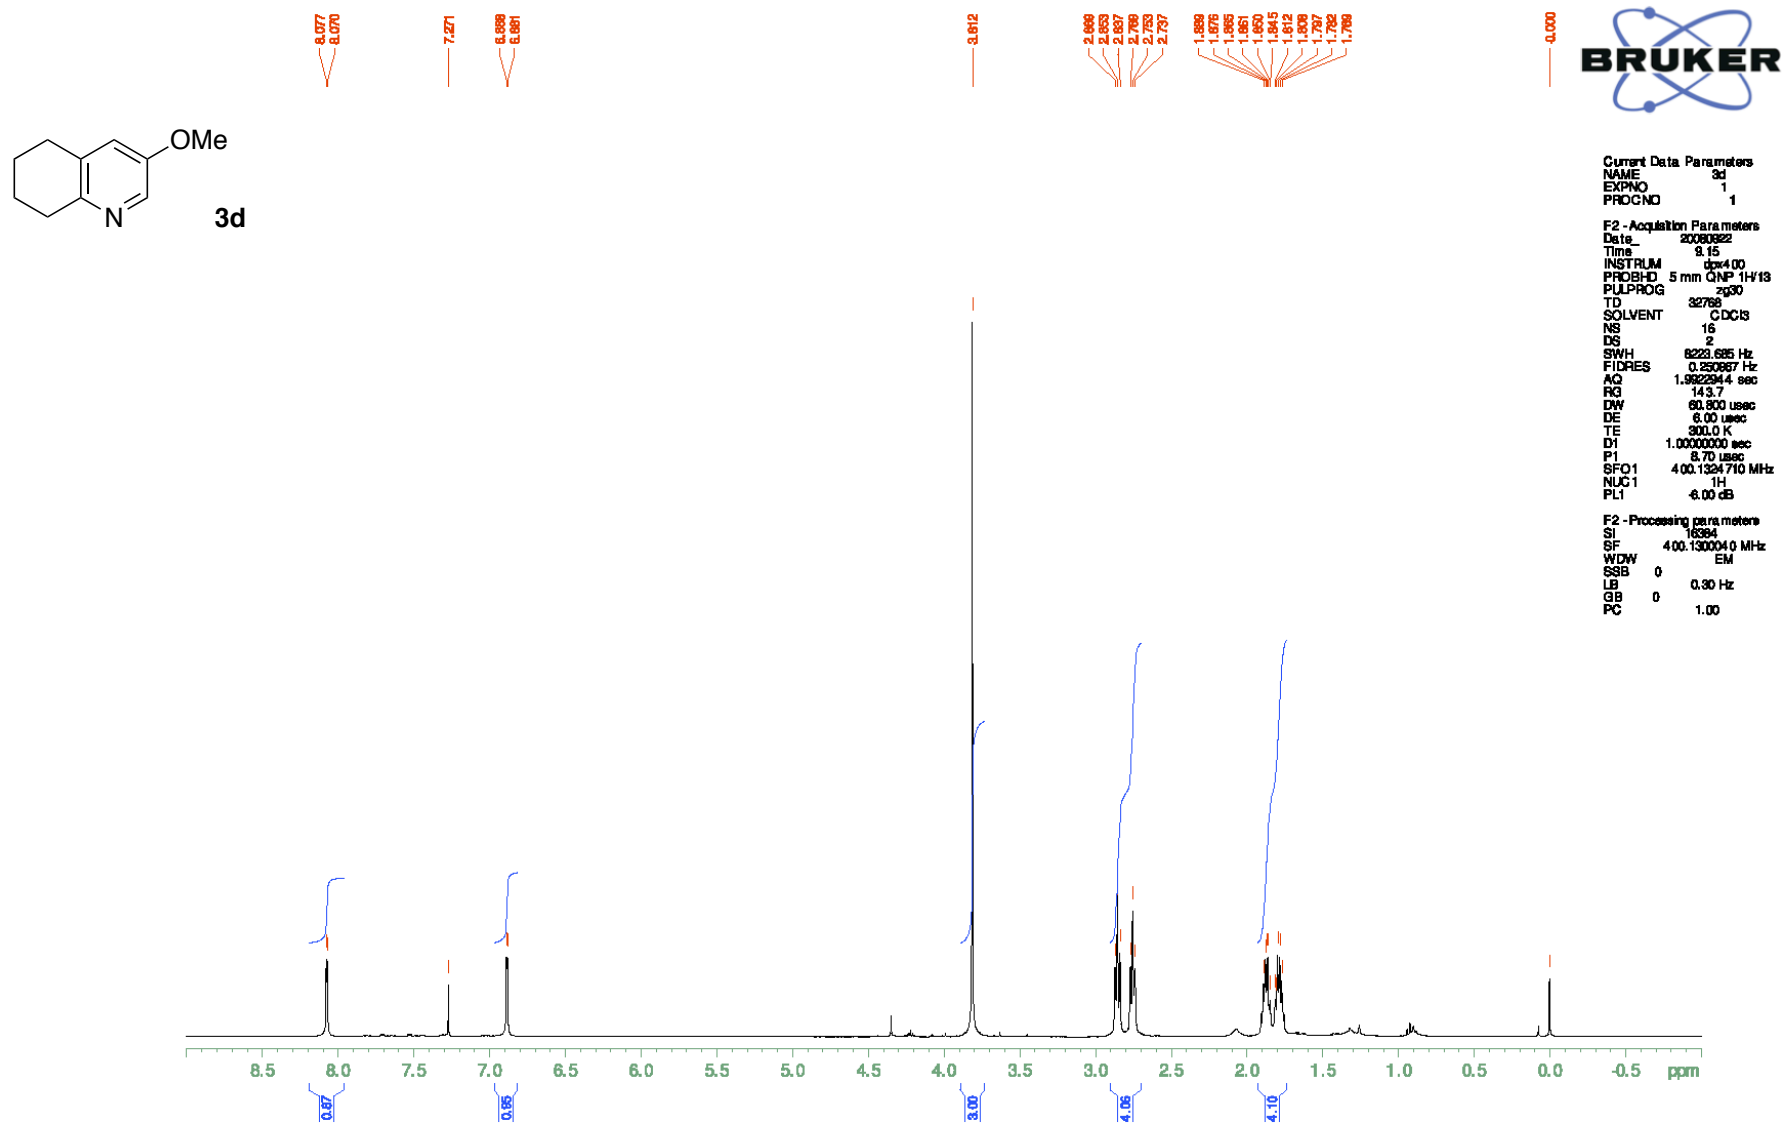

**Figure S-19.**  $^1\text{H}$  NMR spectrum ( $\text{CDCl}_3$ ) of **3d**.

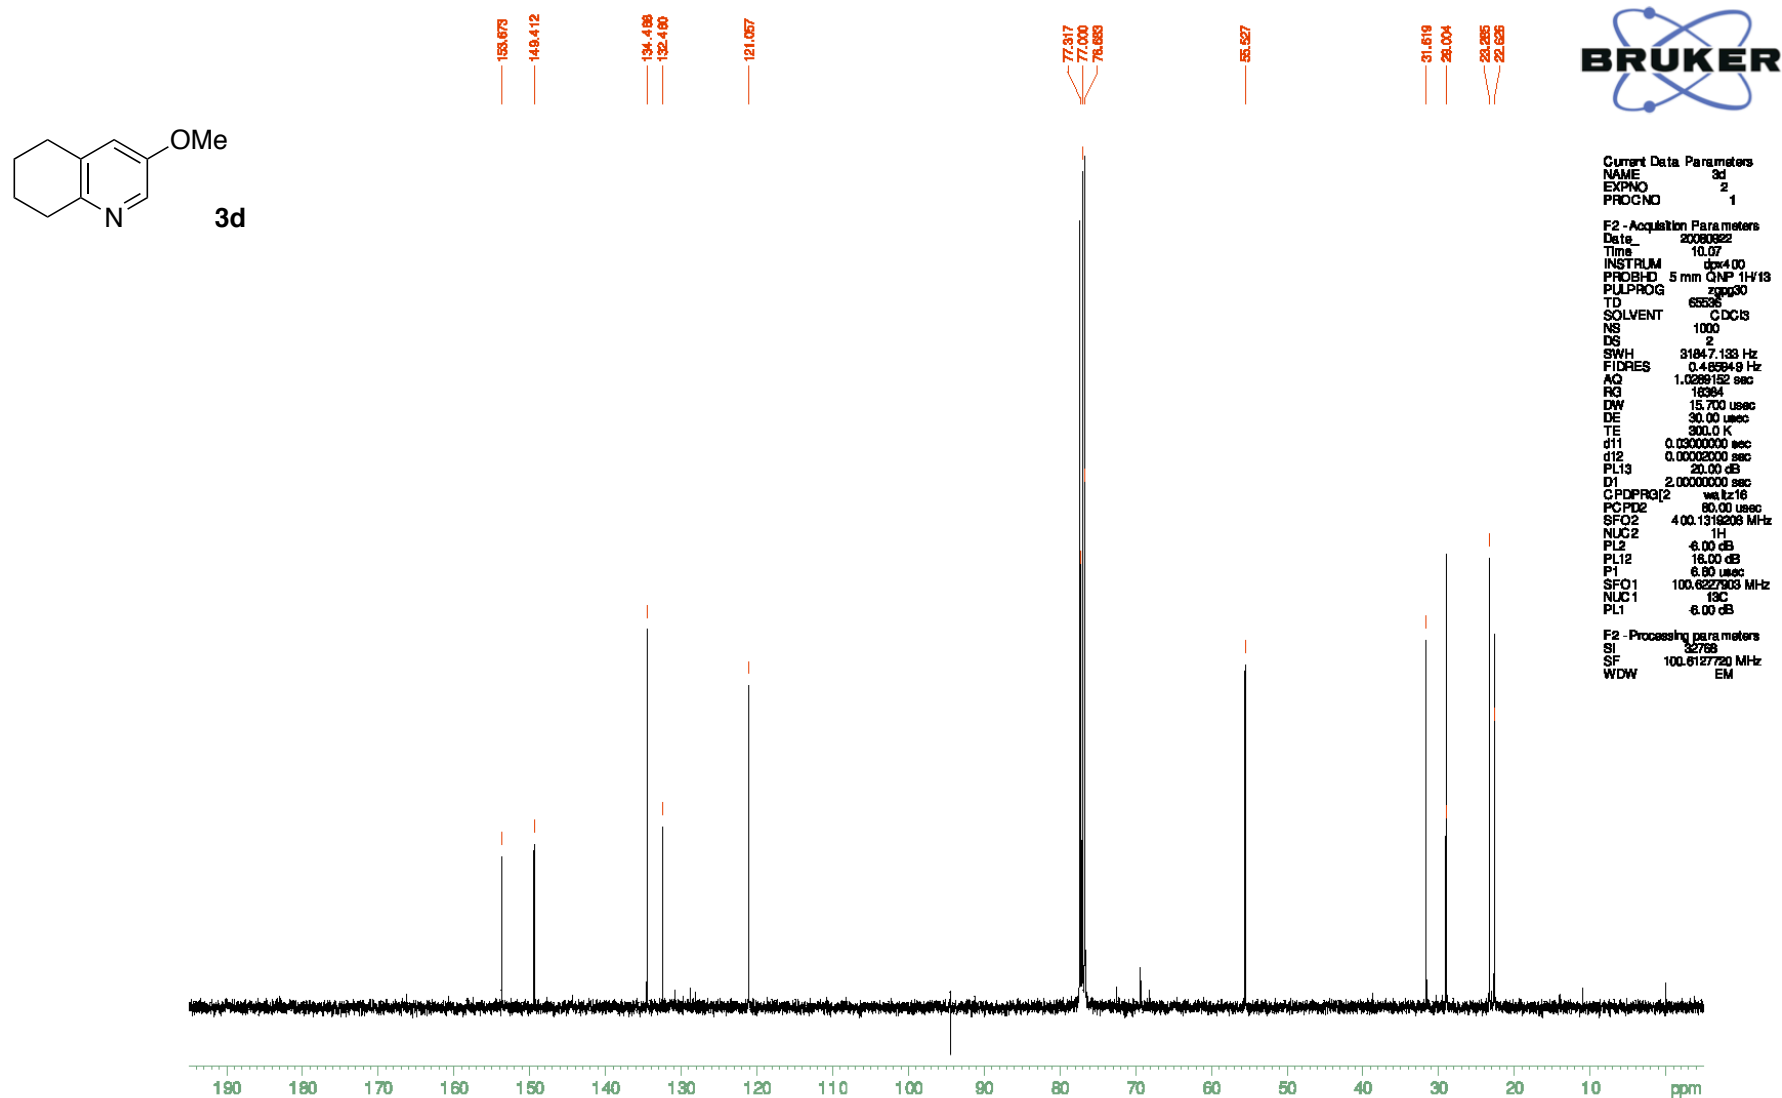

**Figure S-20.**  $^{13}\text{C} \{^1\text{H}\}$  NMR spectrum ( $\text{CDCl}_3$ ) of **3d**.



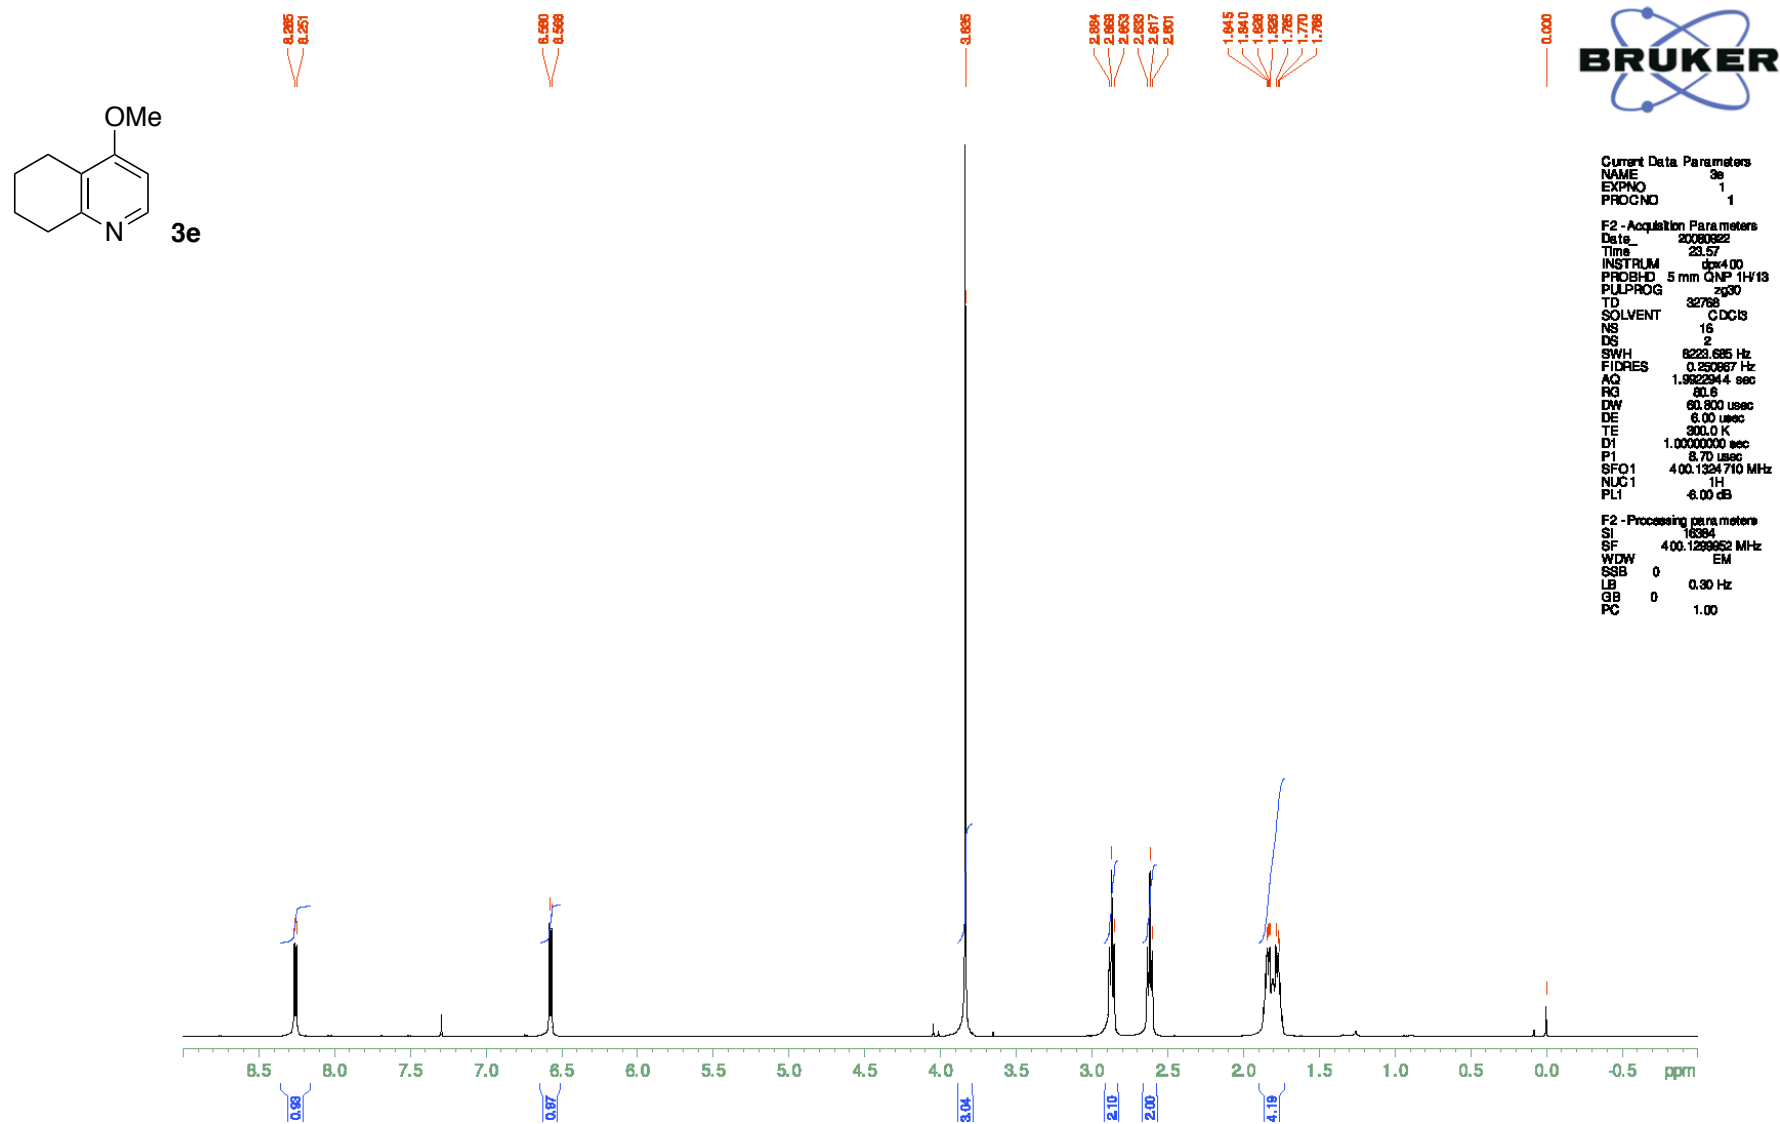

**Figure S-21.**  $^1\text{H}$  NMR spectrum ( $\text{CDCl}_3$ ) of **3e**.

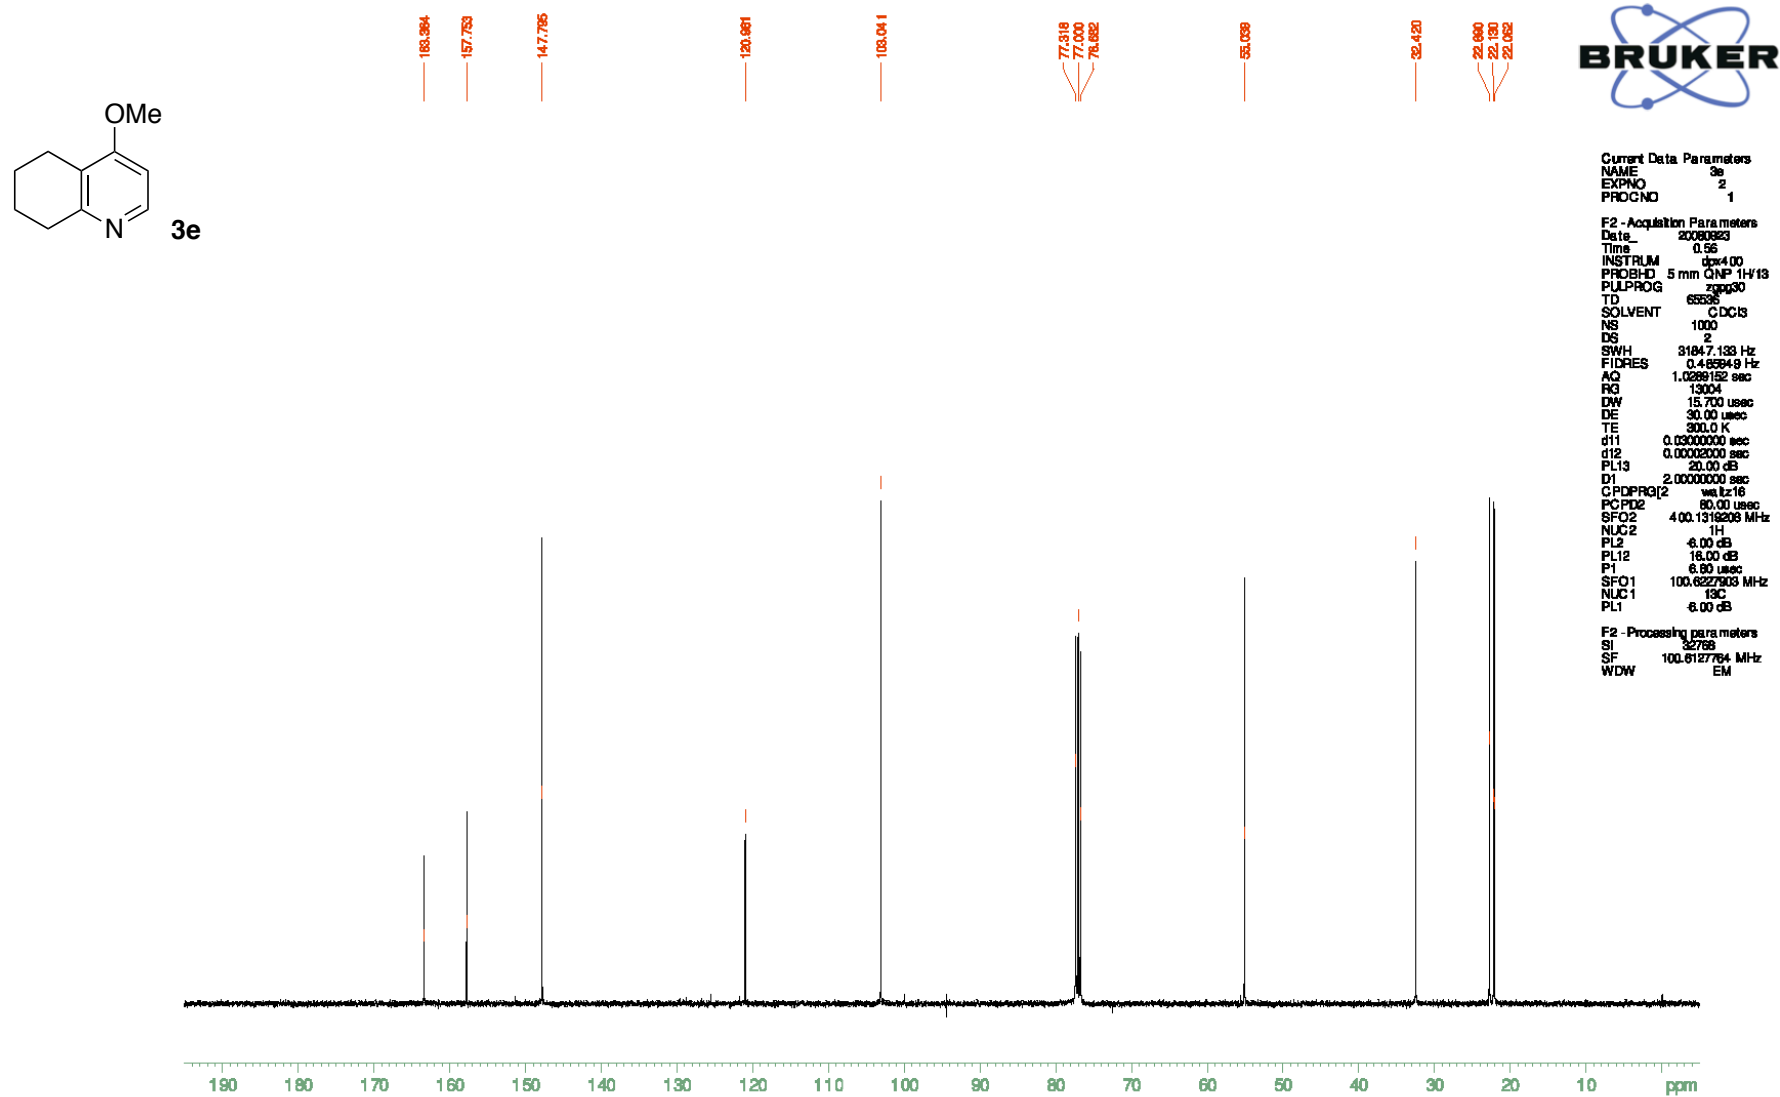

**Figure S-22.**  $^{13}\text{C}$   $\{^1\text{H}\}$  NMR spectrum ( $\text{CDCl}_3$ ) of **3e**.

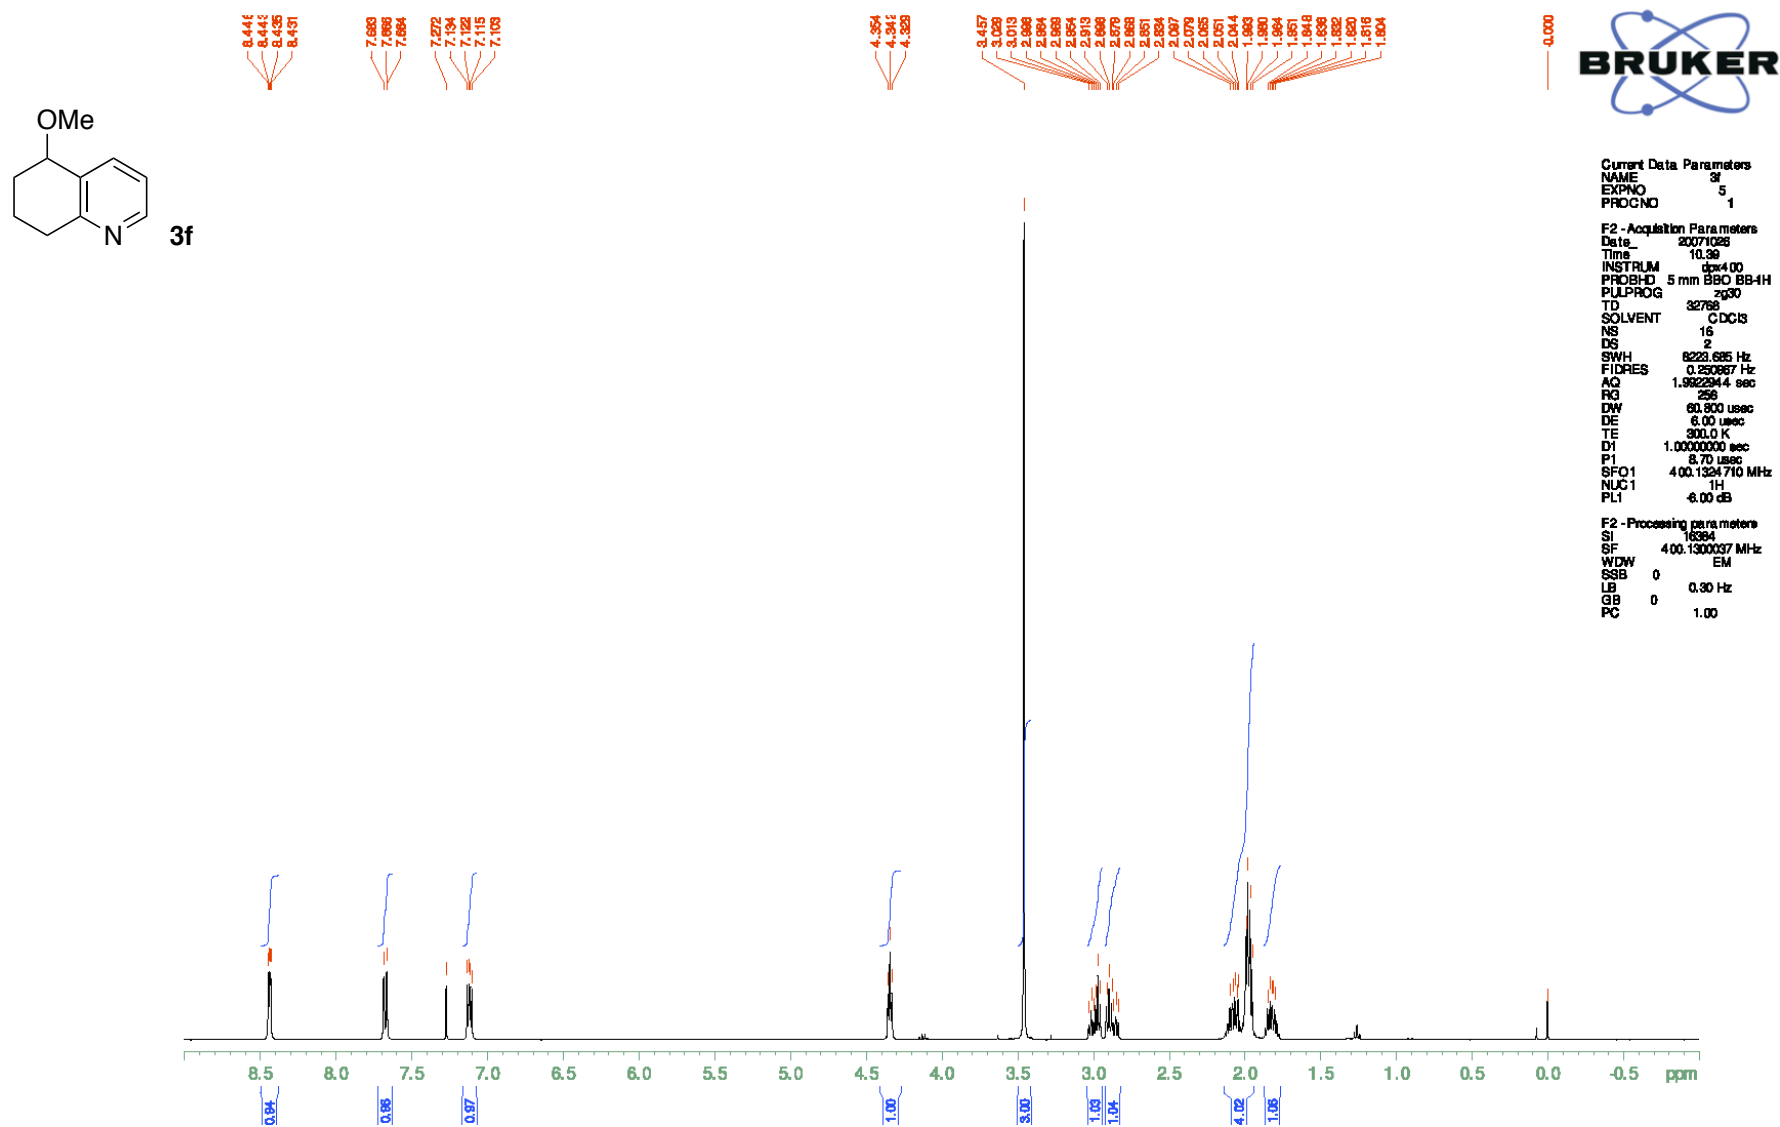

Figure S-23.  $^1\text{H}$  NMR spectrum ( $\text{CDCl}_3$ ) of **3f**.

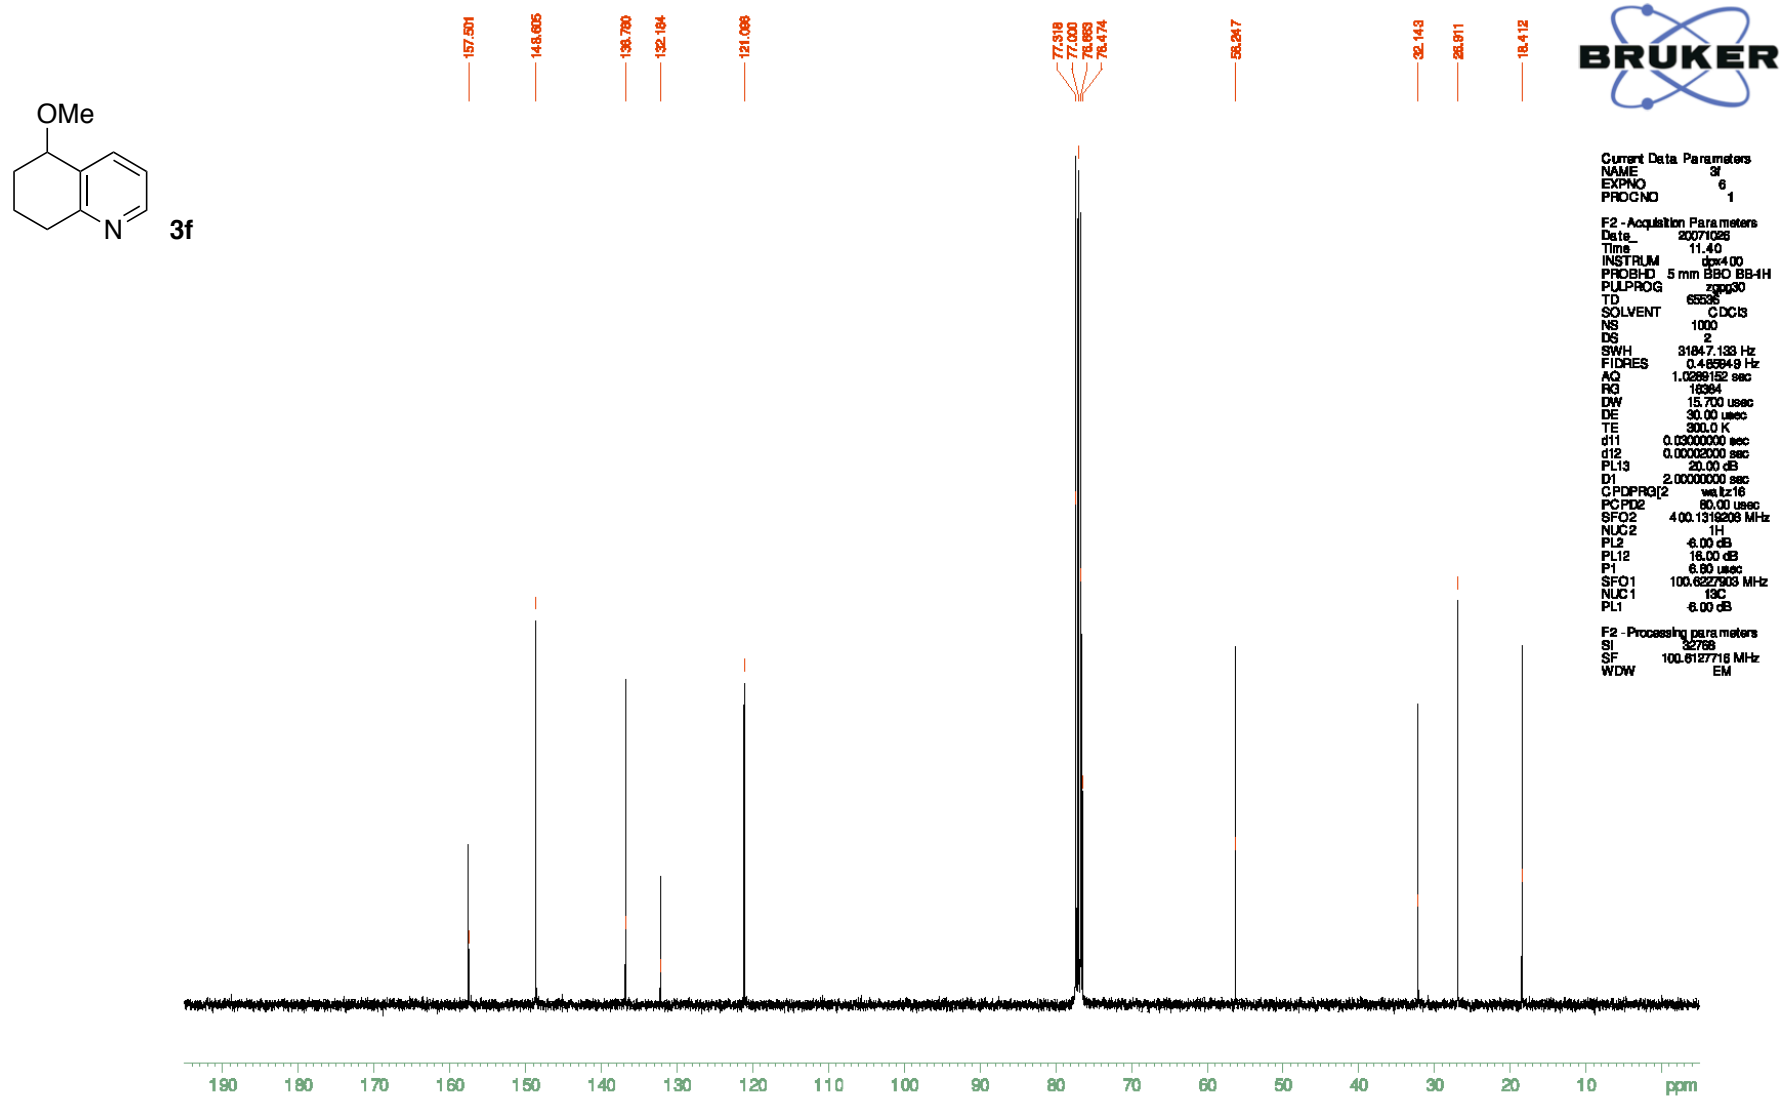

**Figure S-24.**  $^{13}\text{C}$   $\{^1\text{H}\}$  NMR spectrum ( $\text{CDCl}_3$ ) of **3f**.

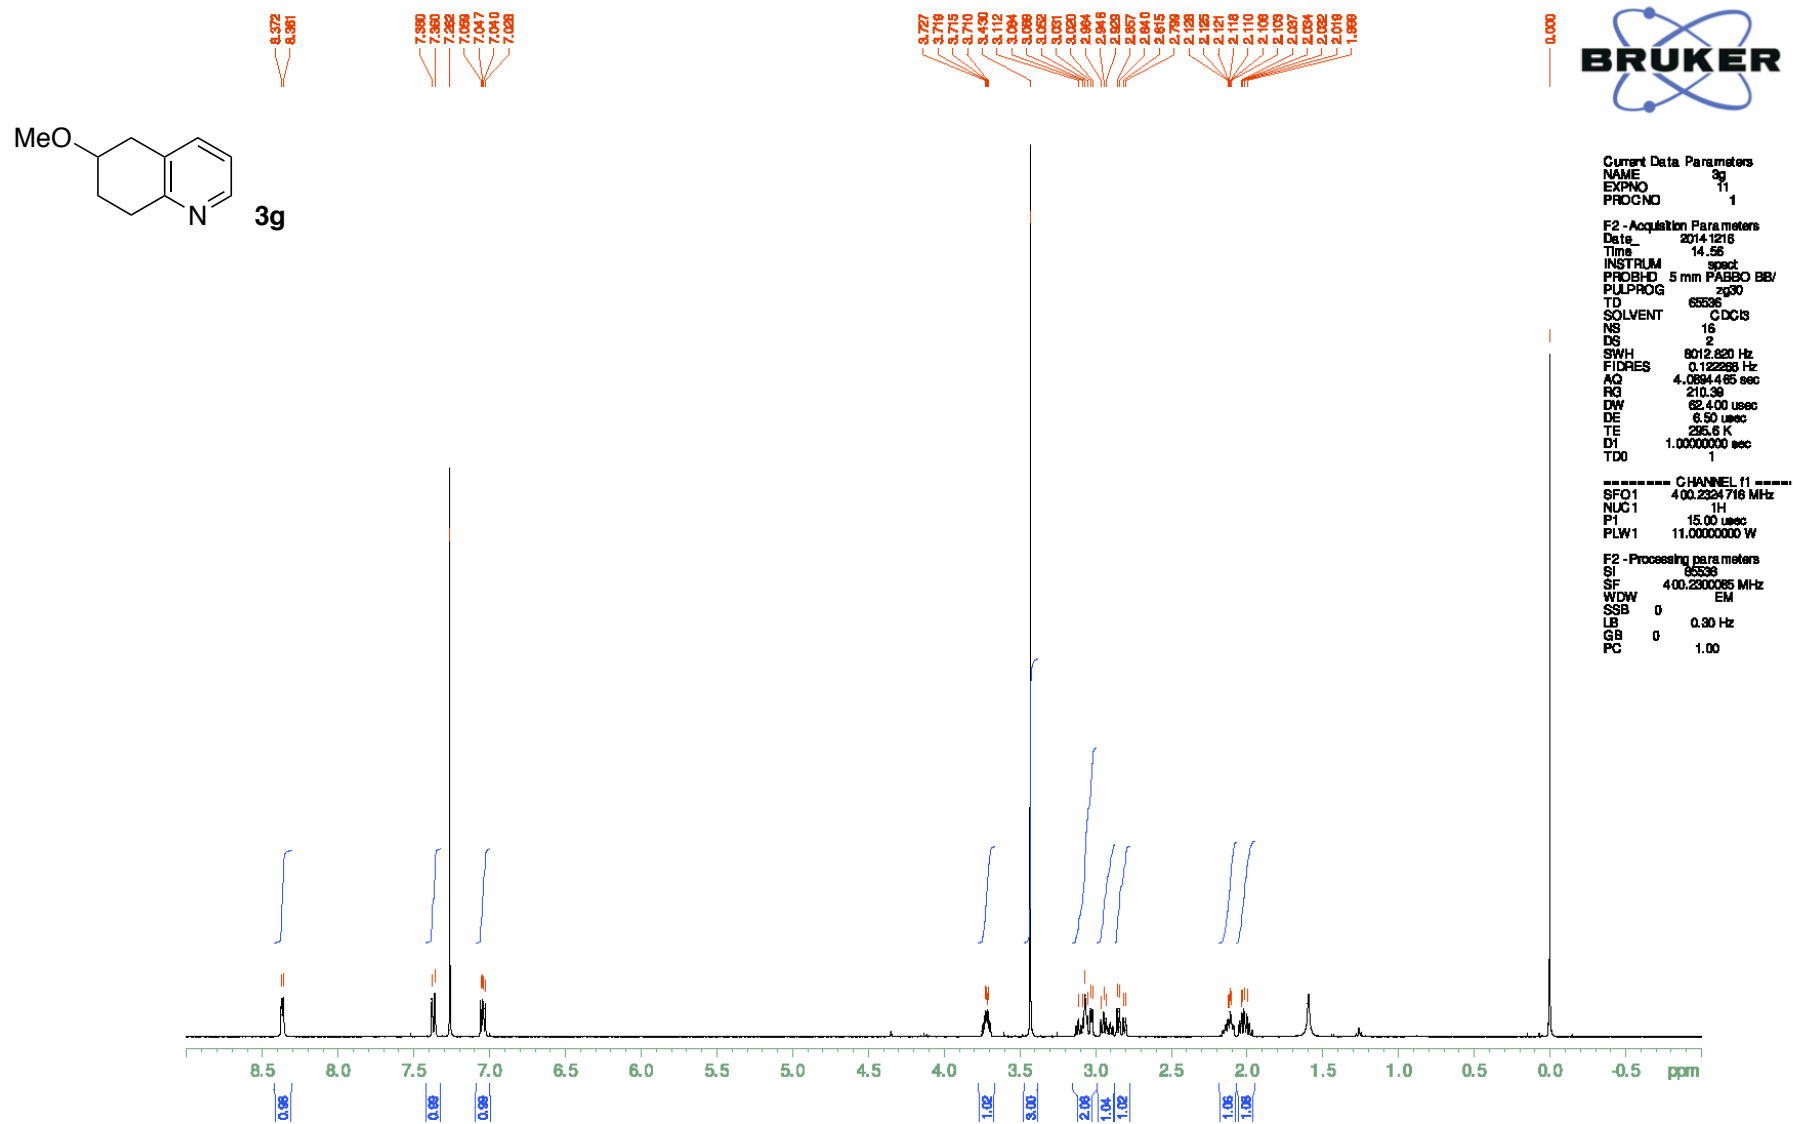

Figure S-25.  $^1\text{H}$  NMR spectrum ( $\text{CDCl}_3$ ) of **3g**.

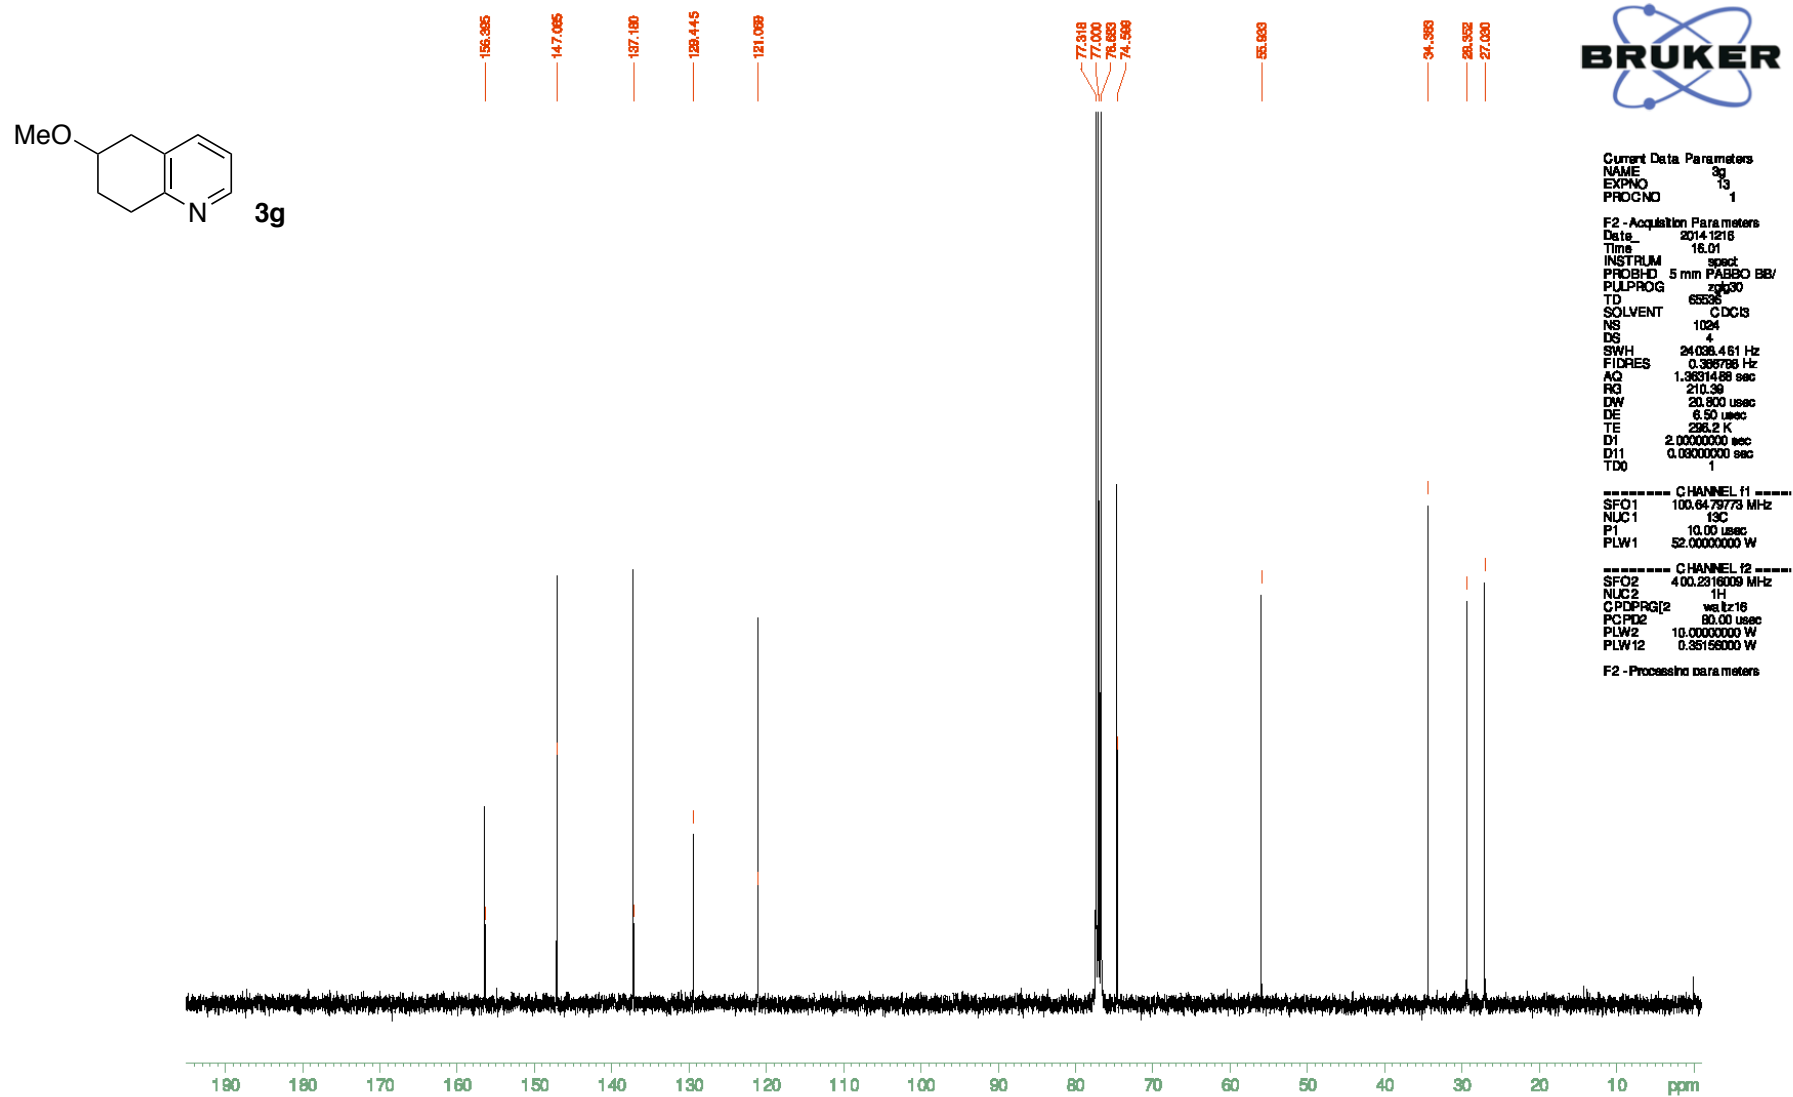

Figure S-26.  $^{13}\text{C} \{^1\text{H}\}$  NMR spectrum ( $\text{CDCl}_3$ ) of **3g**.

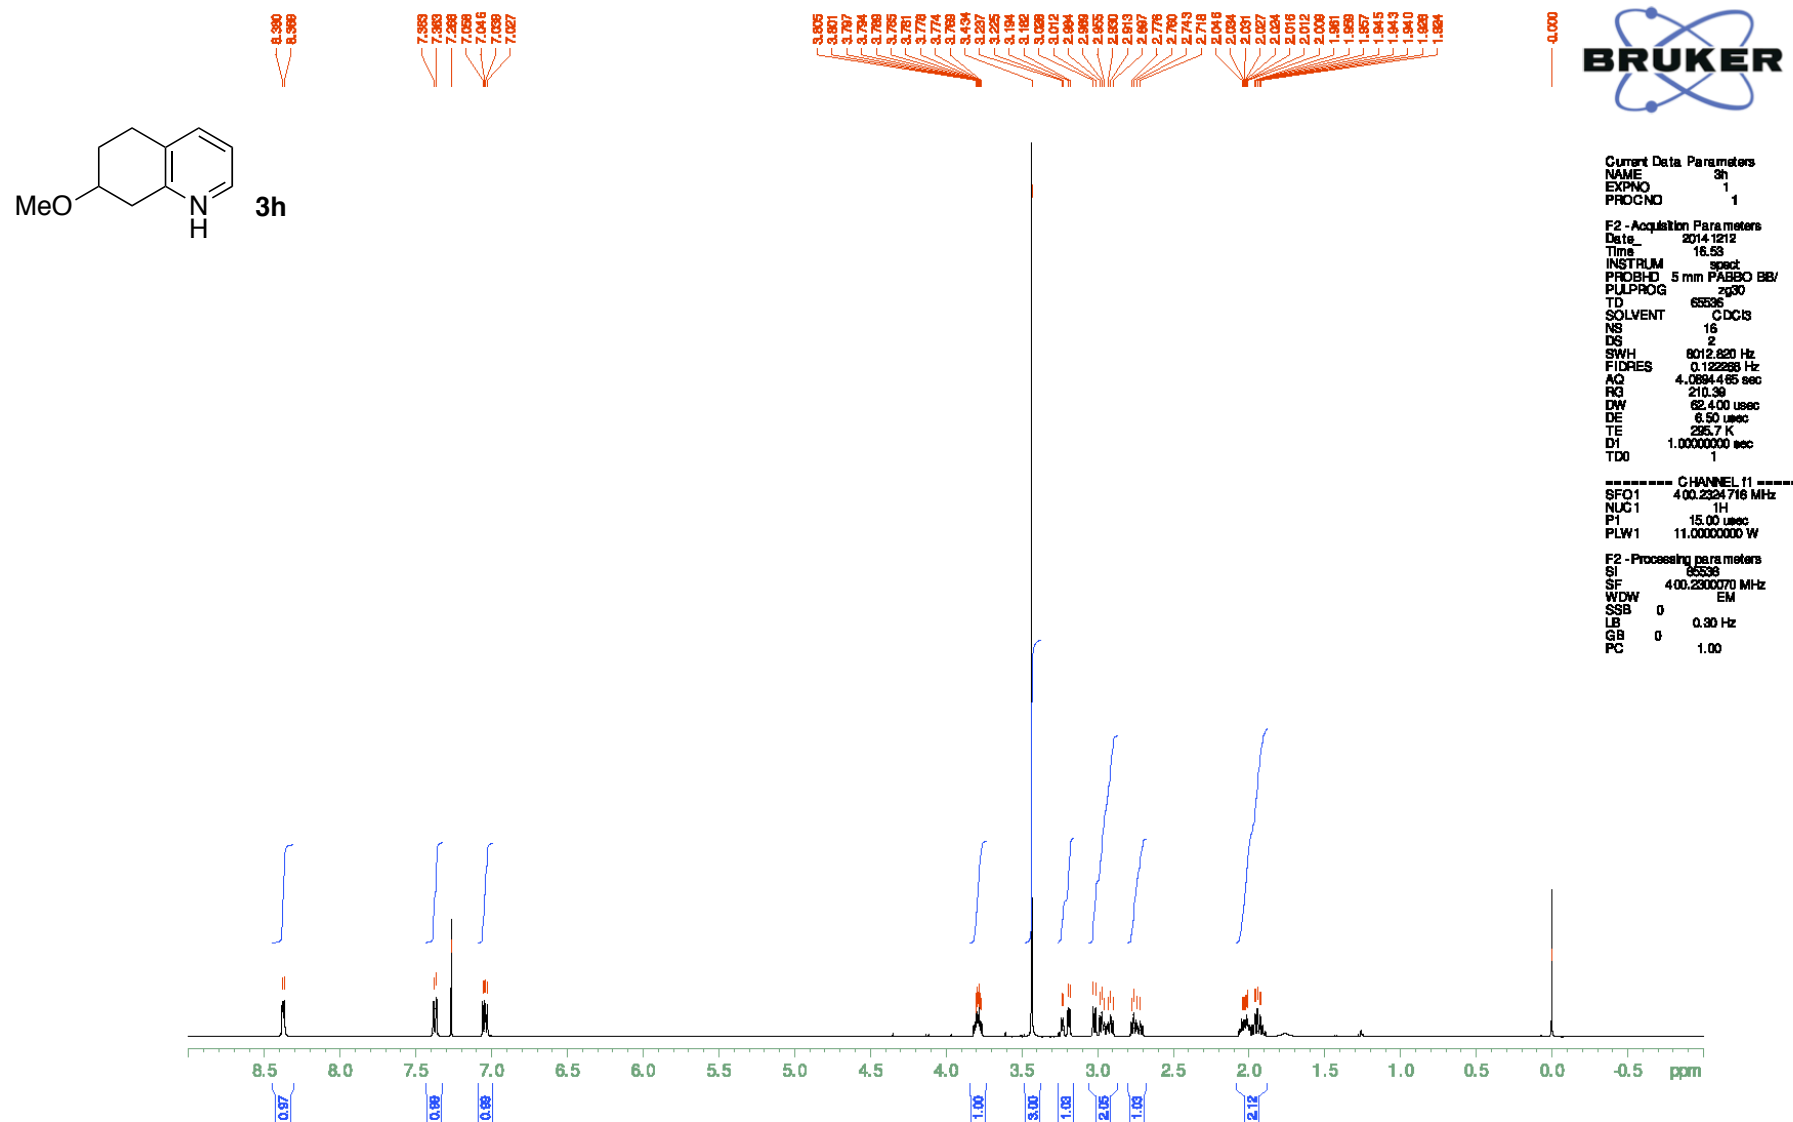

Figure S-27.  $^1\text{H}$  NMR spectrum ( $\text{CDCl}_3$ ) of **3h**.

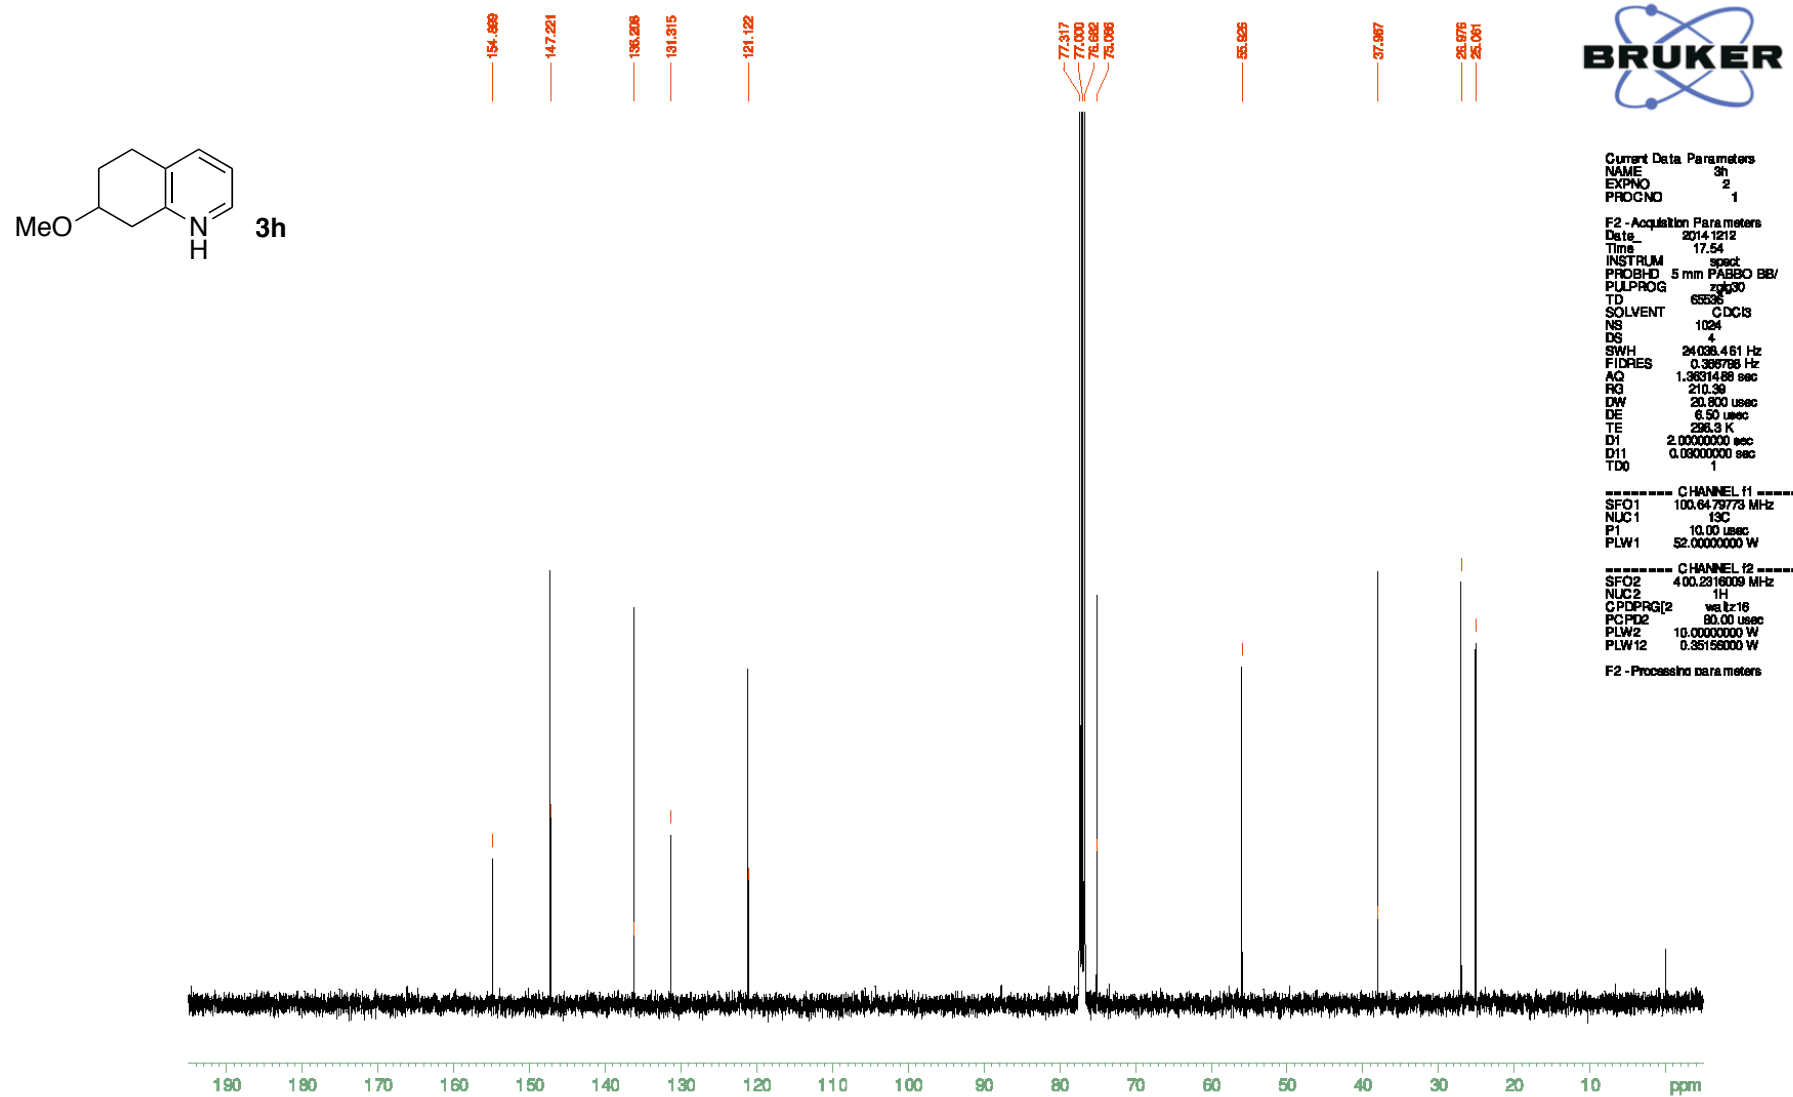

**Figure S-28.**  $^{13}\text{C} \{^1\text{H}\}$  NMR spectrum ( $\text{CDCl}_3$ ) of **3h**.



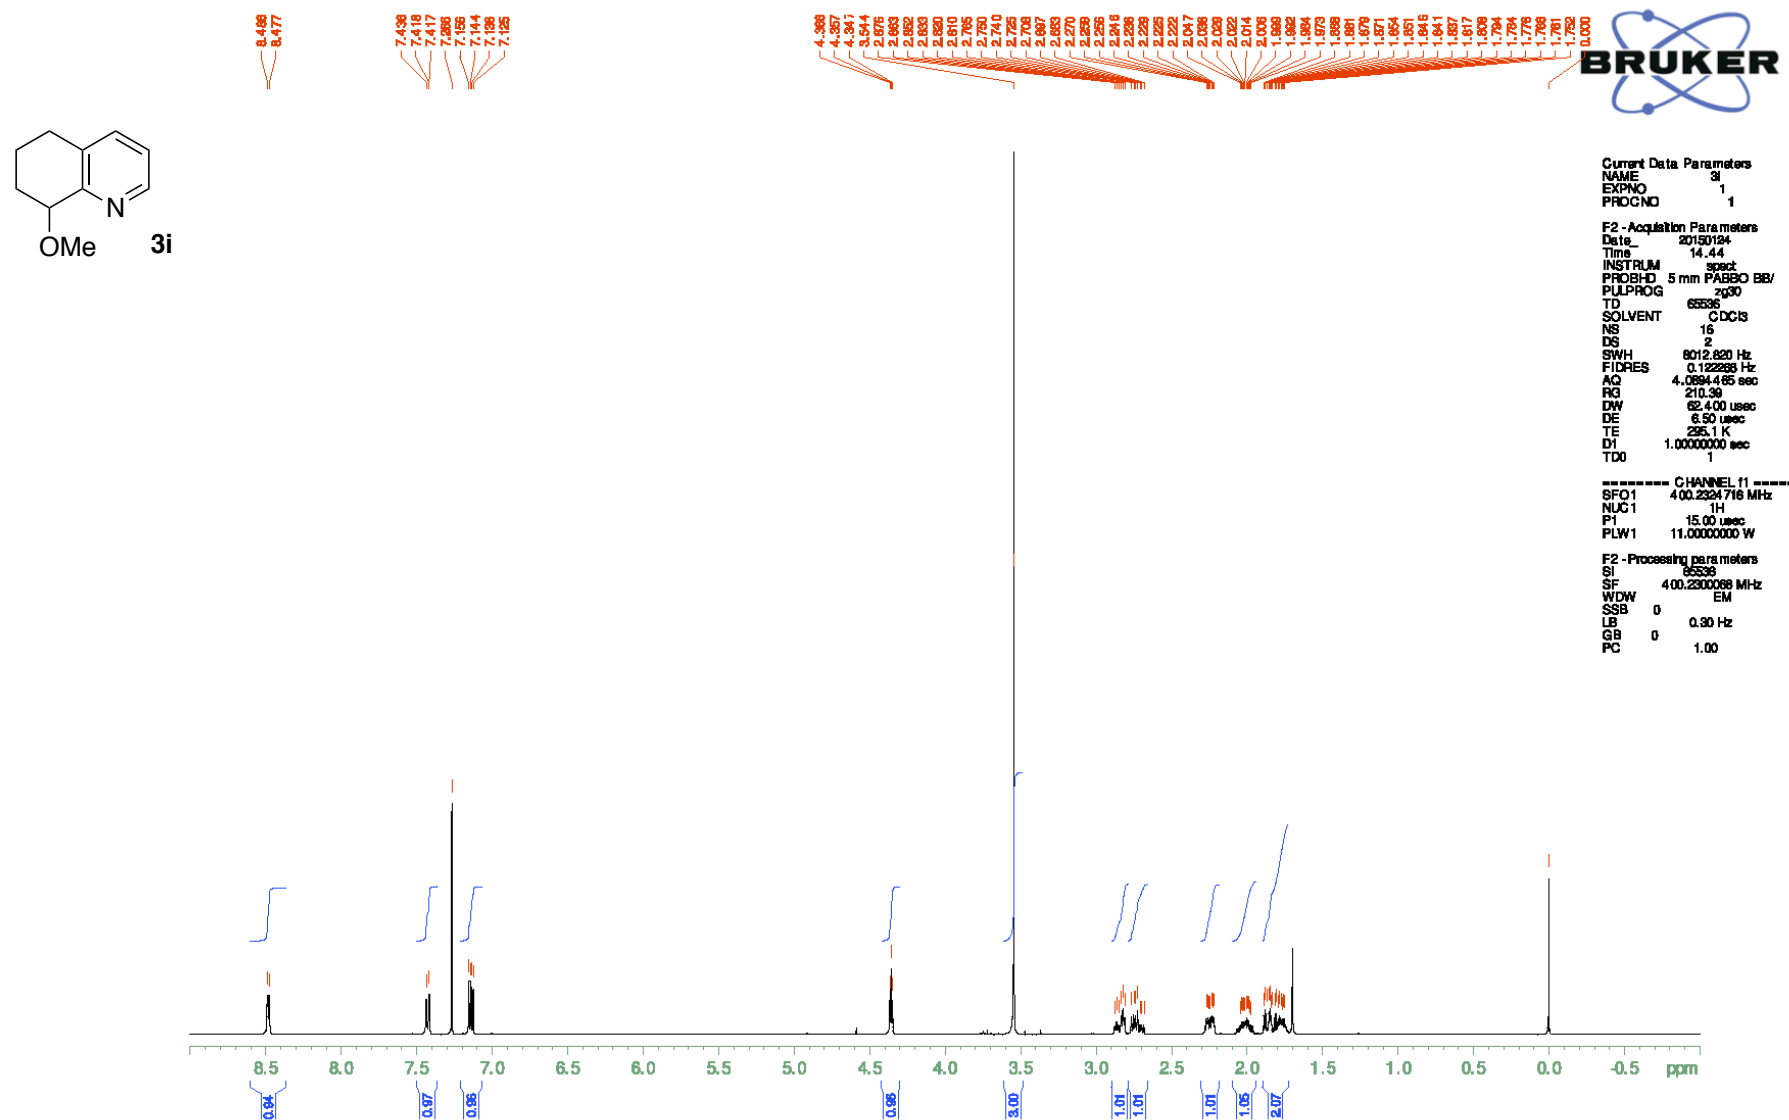

Figure S-29.  $^1\text{H}$  NMR spectrum ( $\text{CDCl}_3$ ) of **3i**.

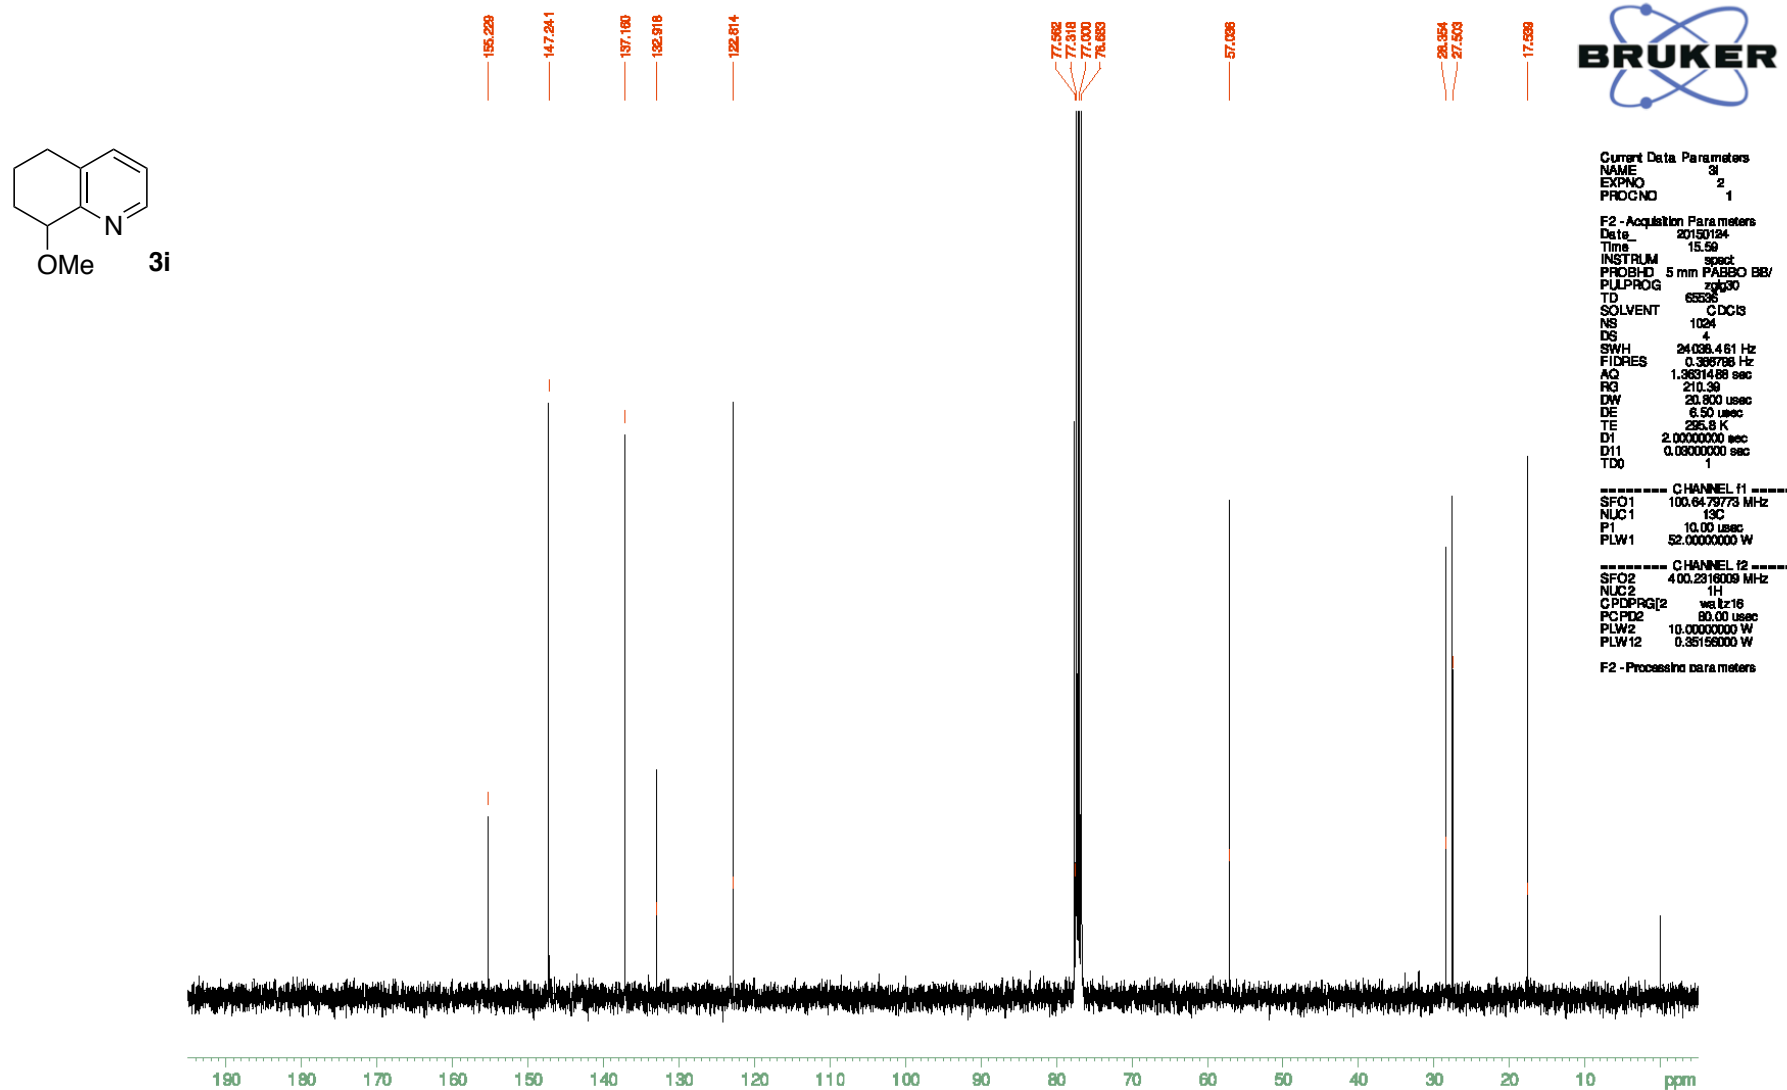

Figure S-30. <sup>13</sup>C {<sup>1</sup>H} NMR spectrum (CDCl<sub>3</sub>) of **3i**.

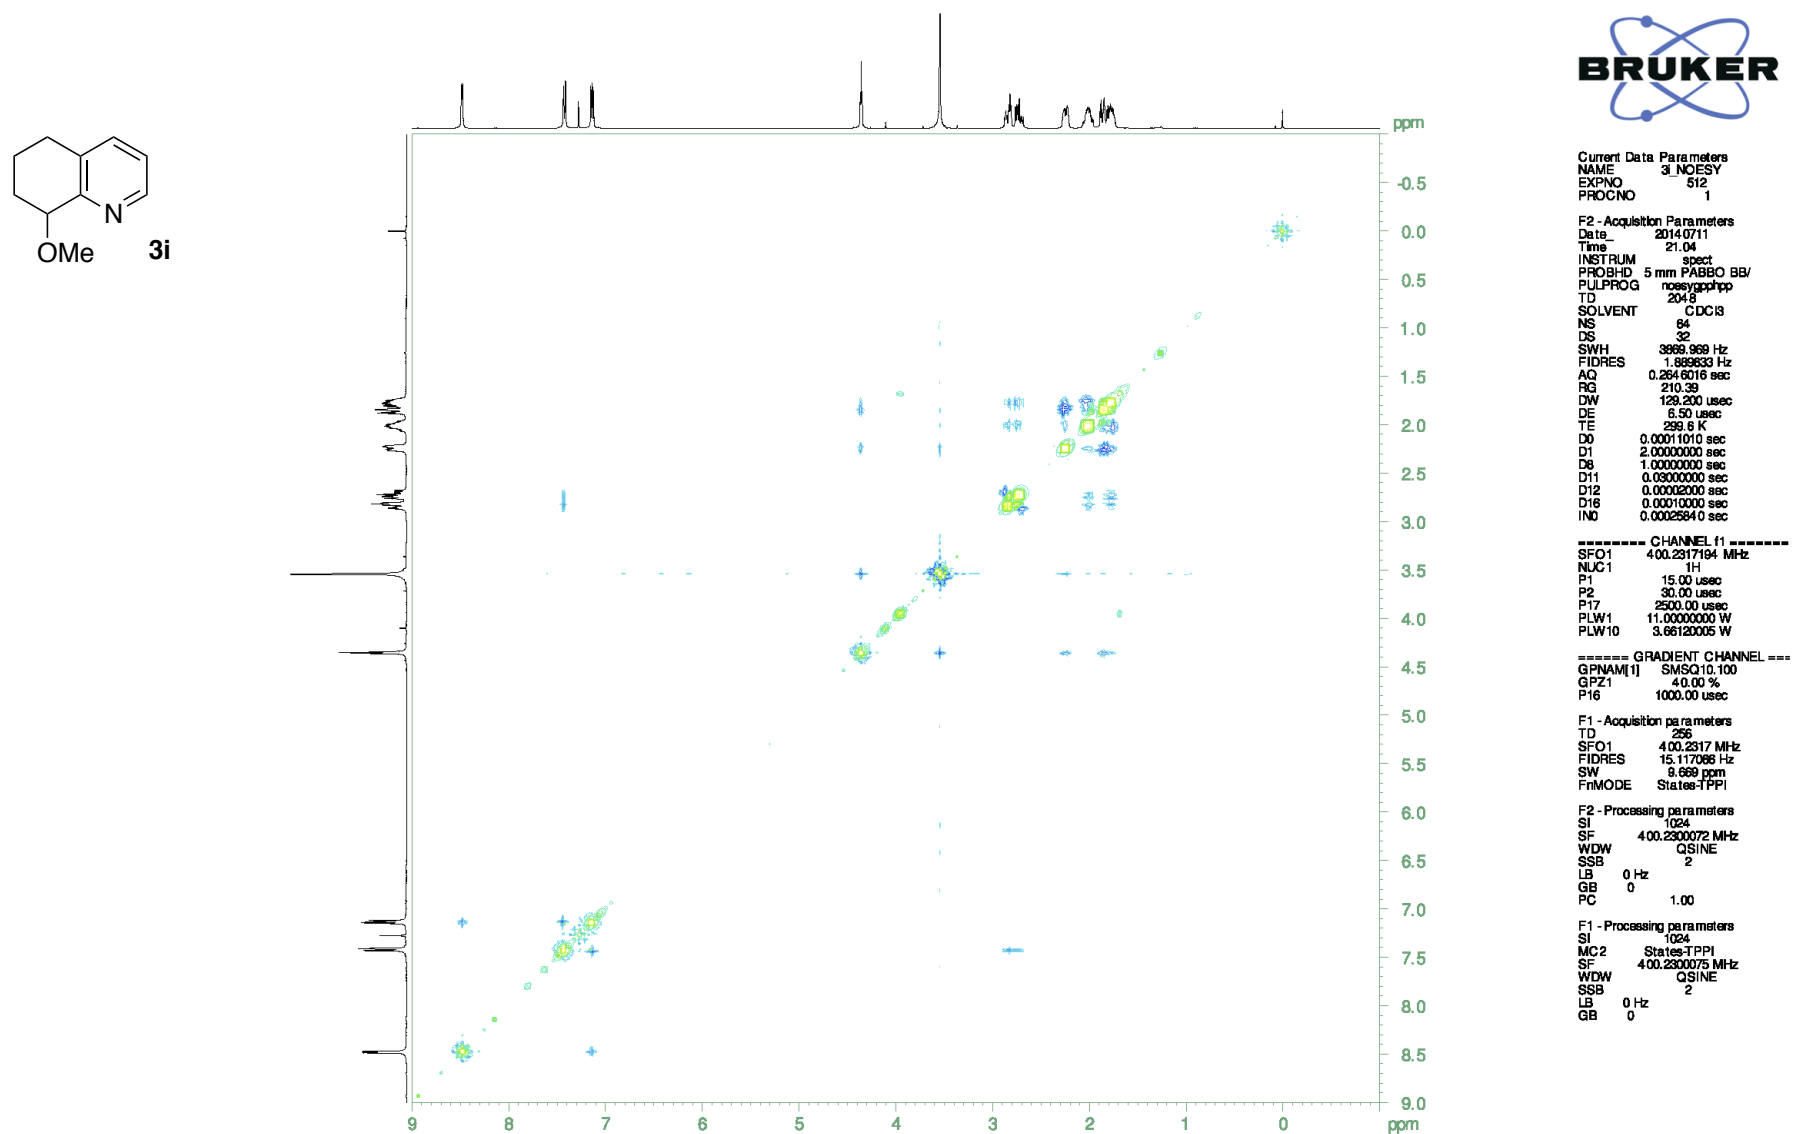

**Figure S-31.** NOESY spectrum ( $\text{CDCl}_3$ ) of **3i**.

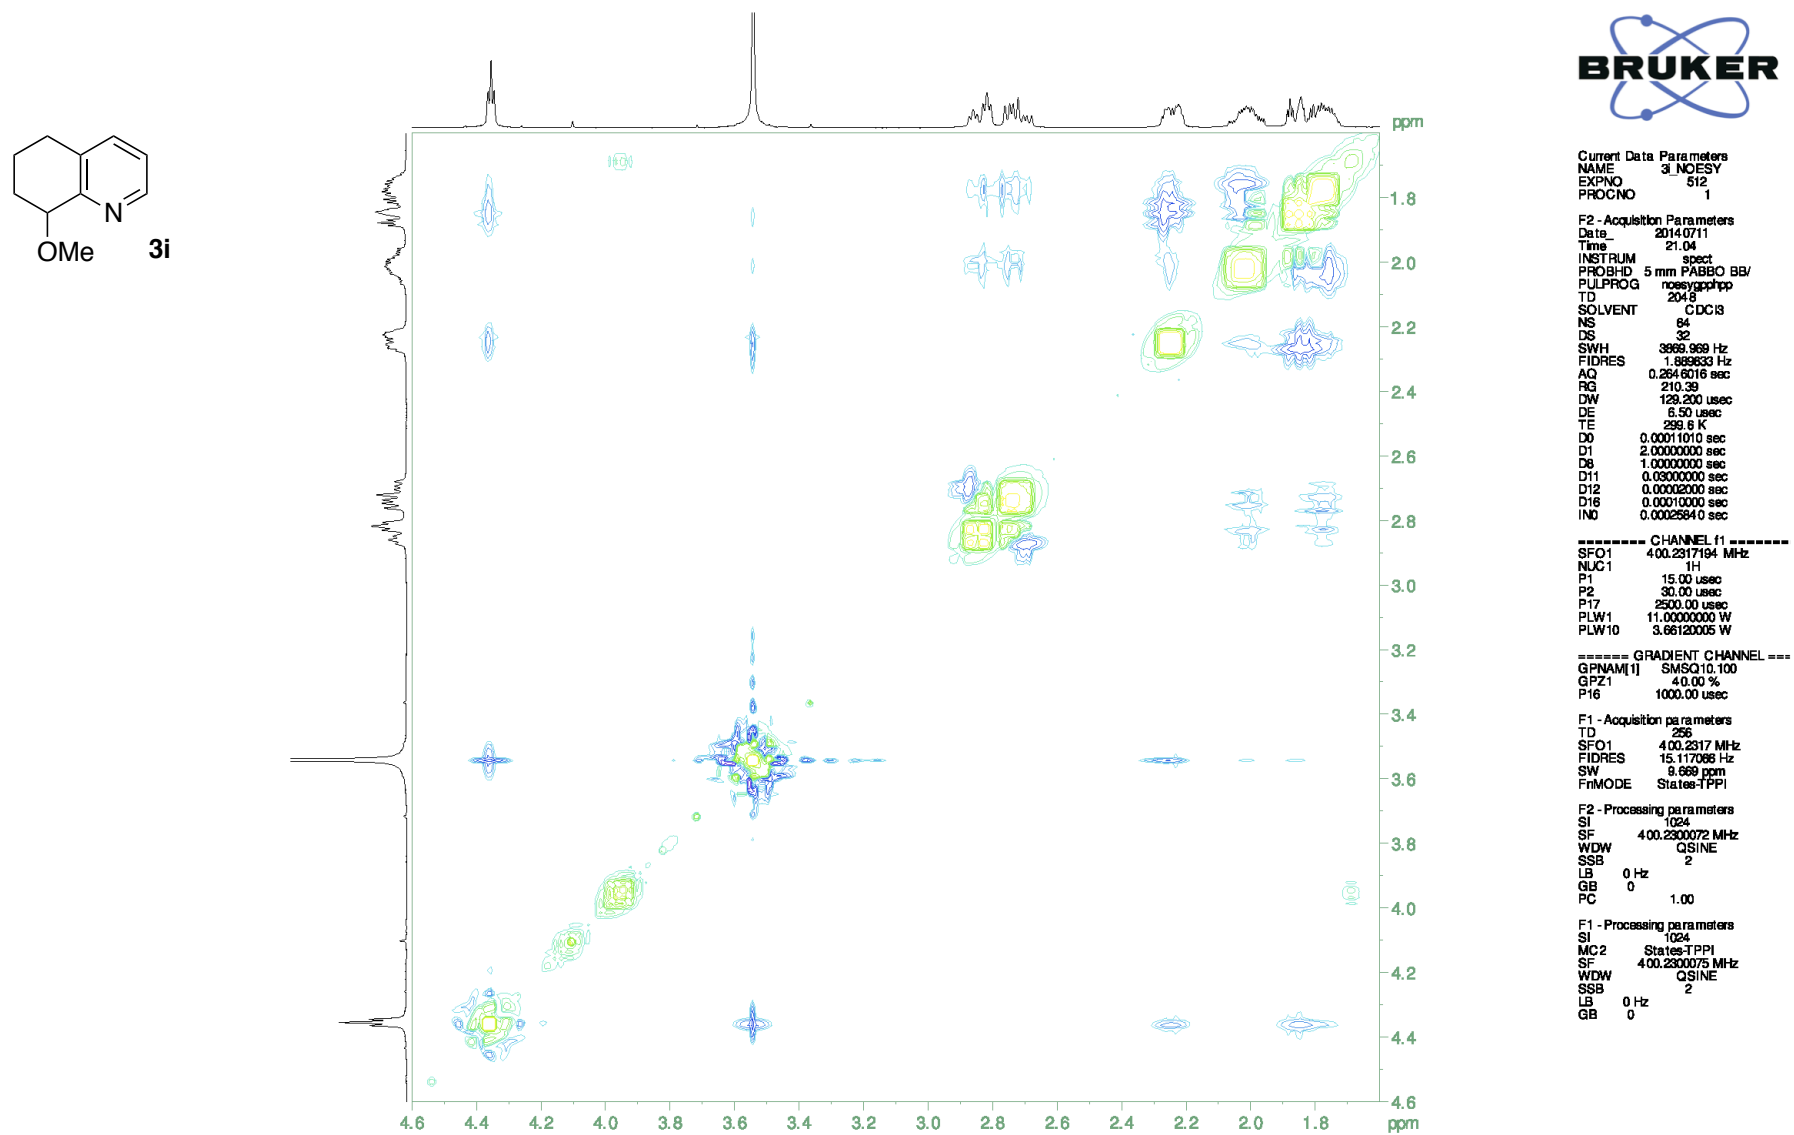

Figure S-32. NOESY spectrum ( $\text{CDCl}_3$ ) of **3i** ( $\delta$  1.6–4.6 ppm).

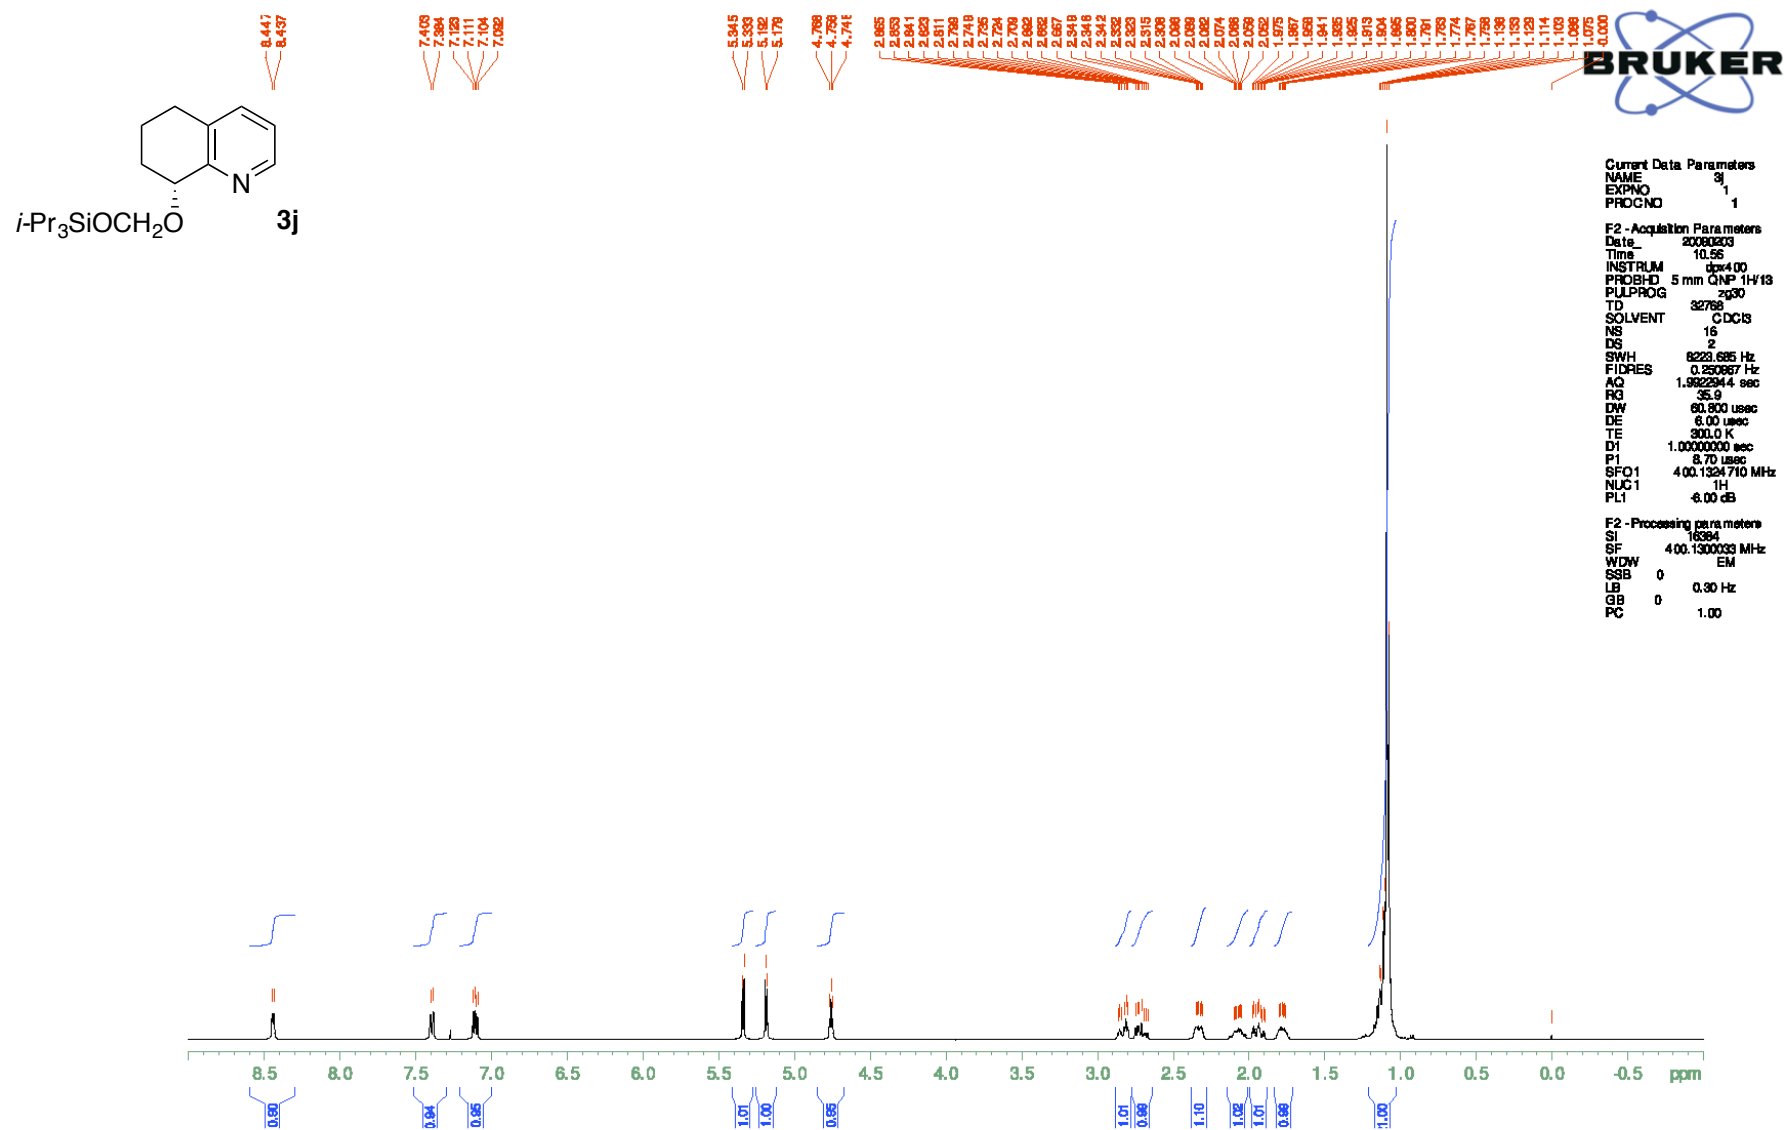

Figure S-33. <sup>1</sup>H NMR spectrum (CDCl<sub>3</sub>) of **3j**.

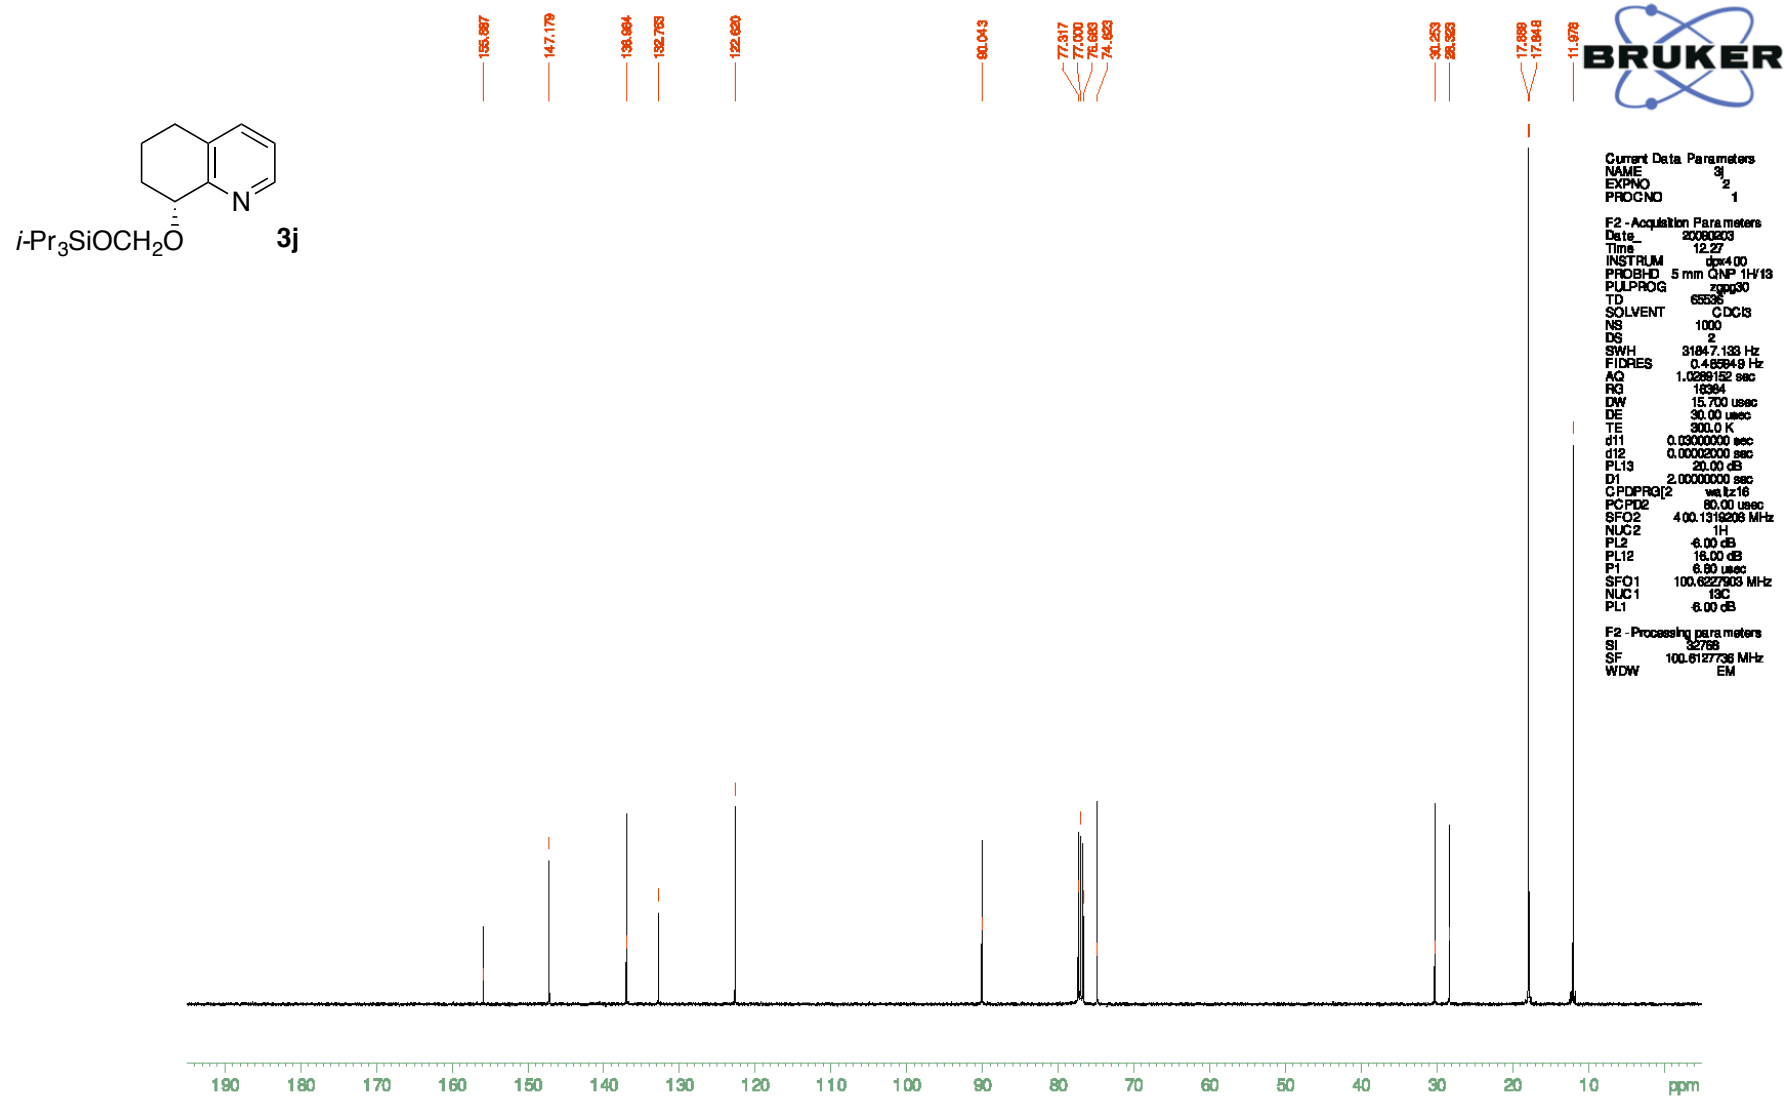

**Figure S-34.**  $^{13}\text{C}$   $\{^1\text{H}\}$  NMR spectrum ( $\text{CDCl}_3$ ) of **3j**.

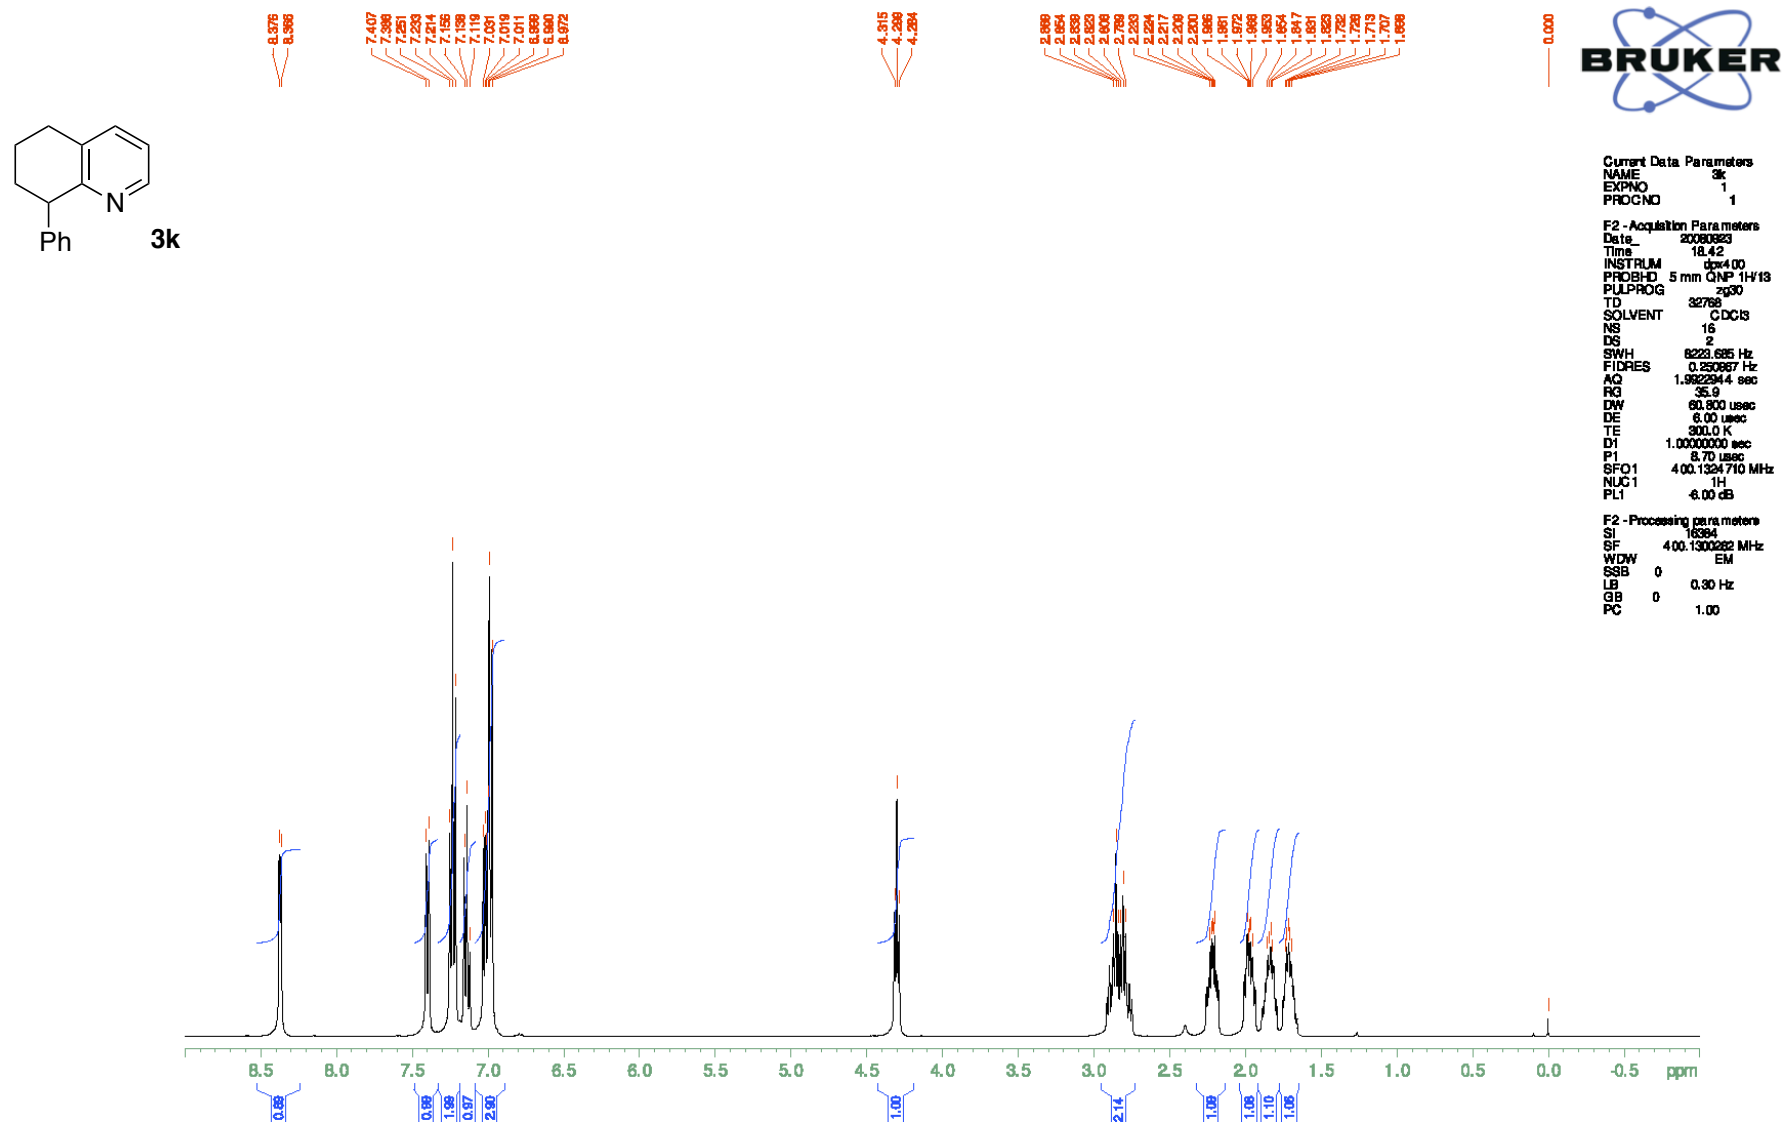

**Figure S-35.** <sup>1</sup>H NMR spectrum (CDCl<sub>3</sub>) of **3k**.

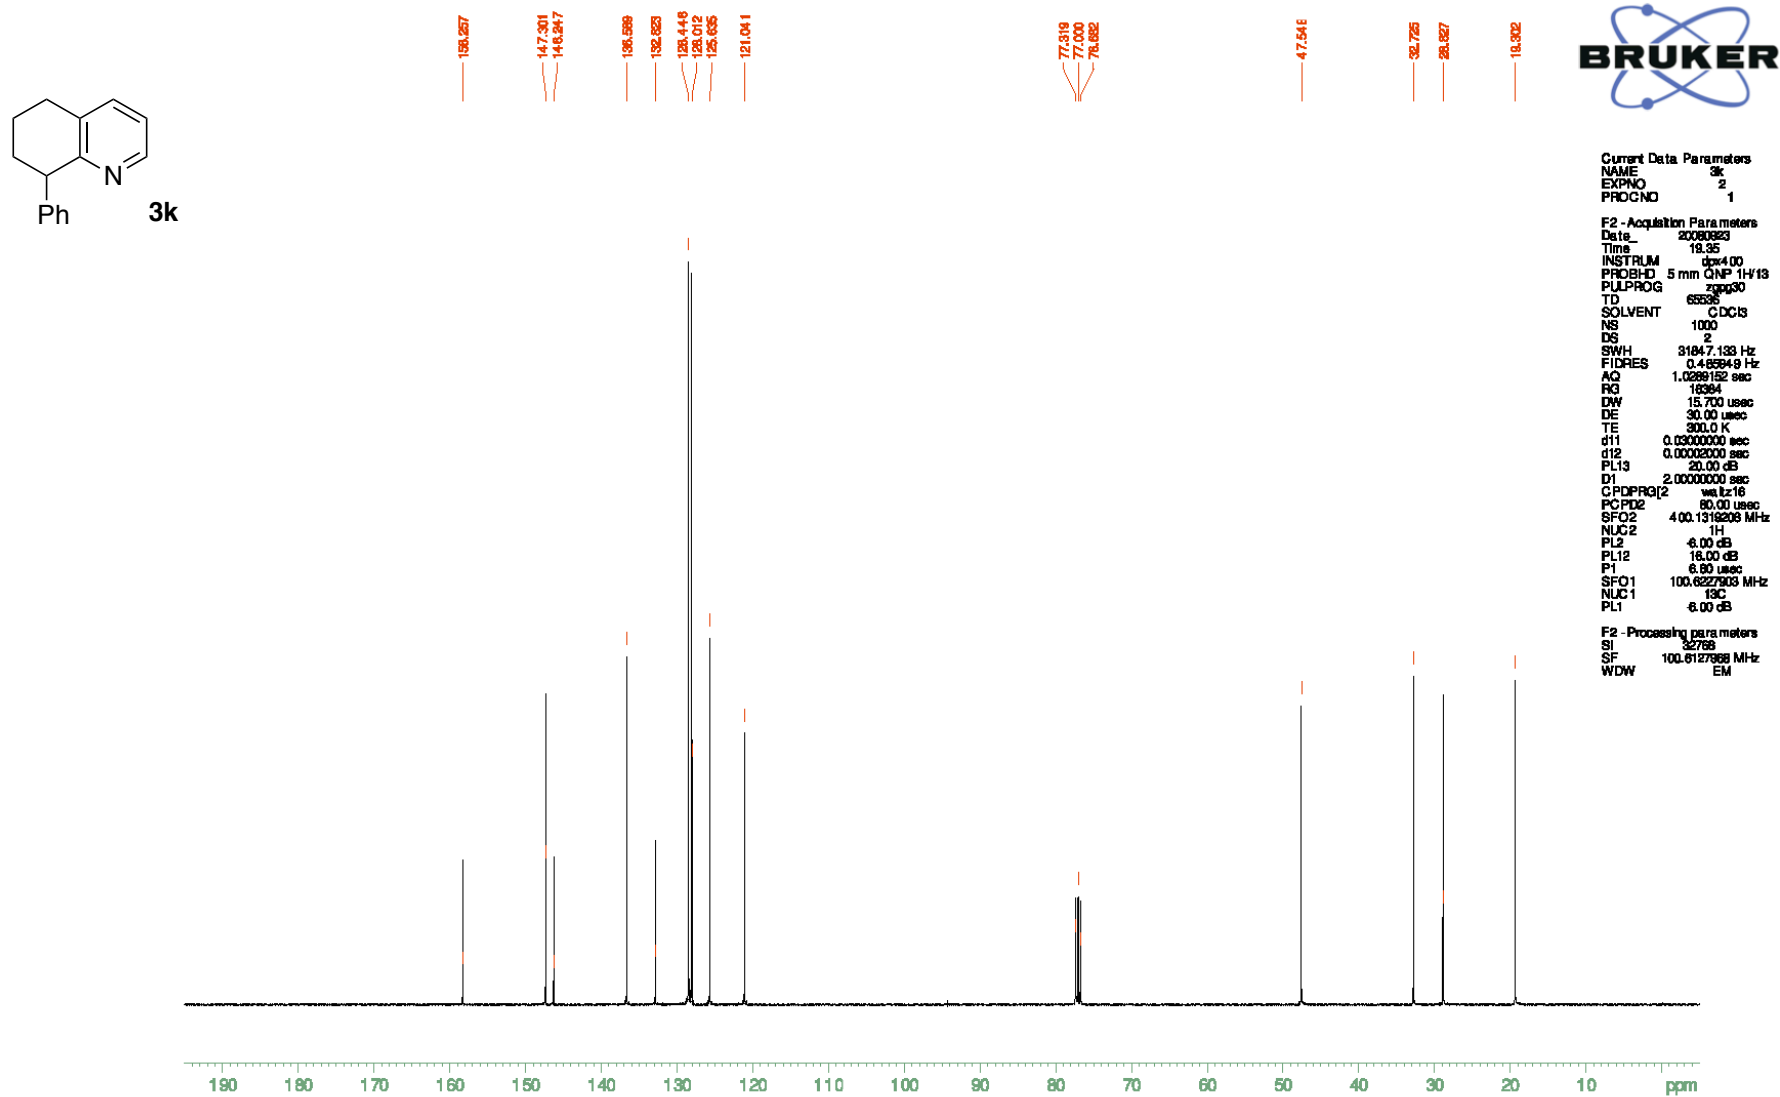

**Figure S-36.**  $^{13}\text{C}$   $\{^1\text{H}\}$  NMR spectrum ( $\text{CDCl}_3$ ) of **3k**.



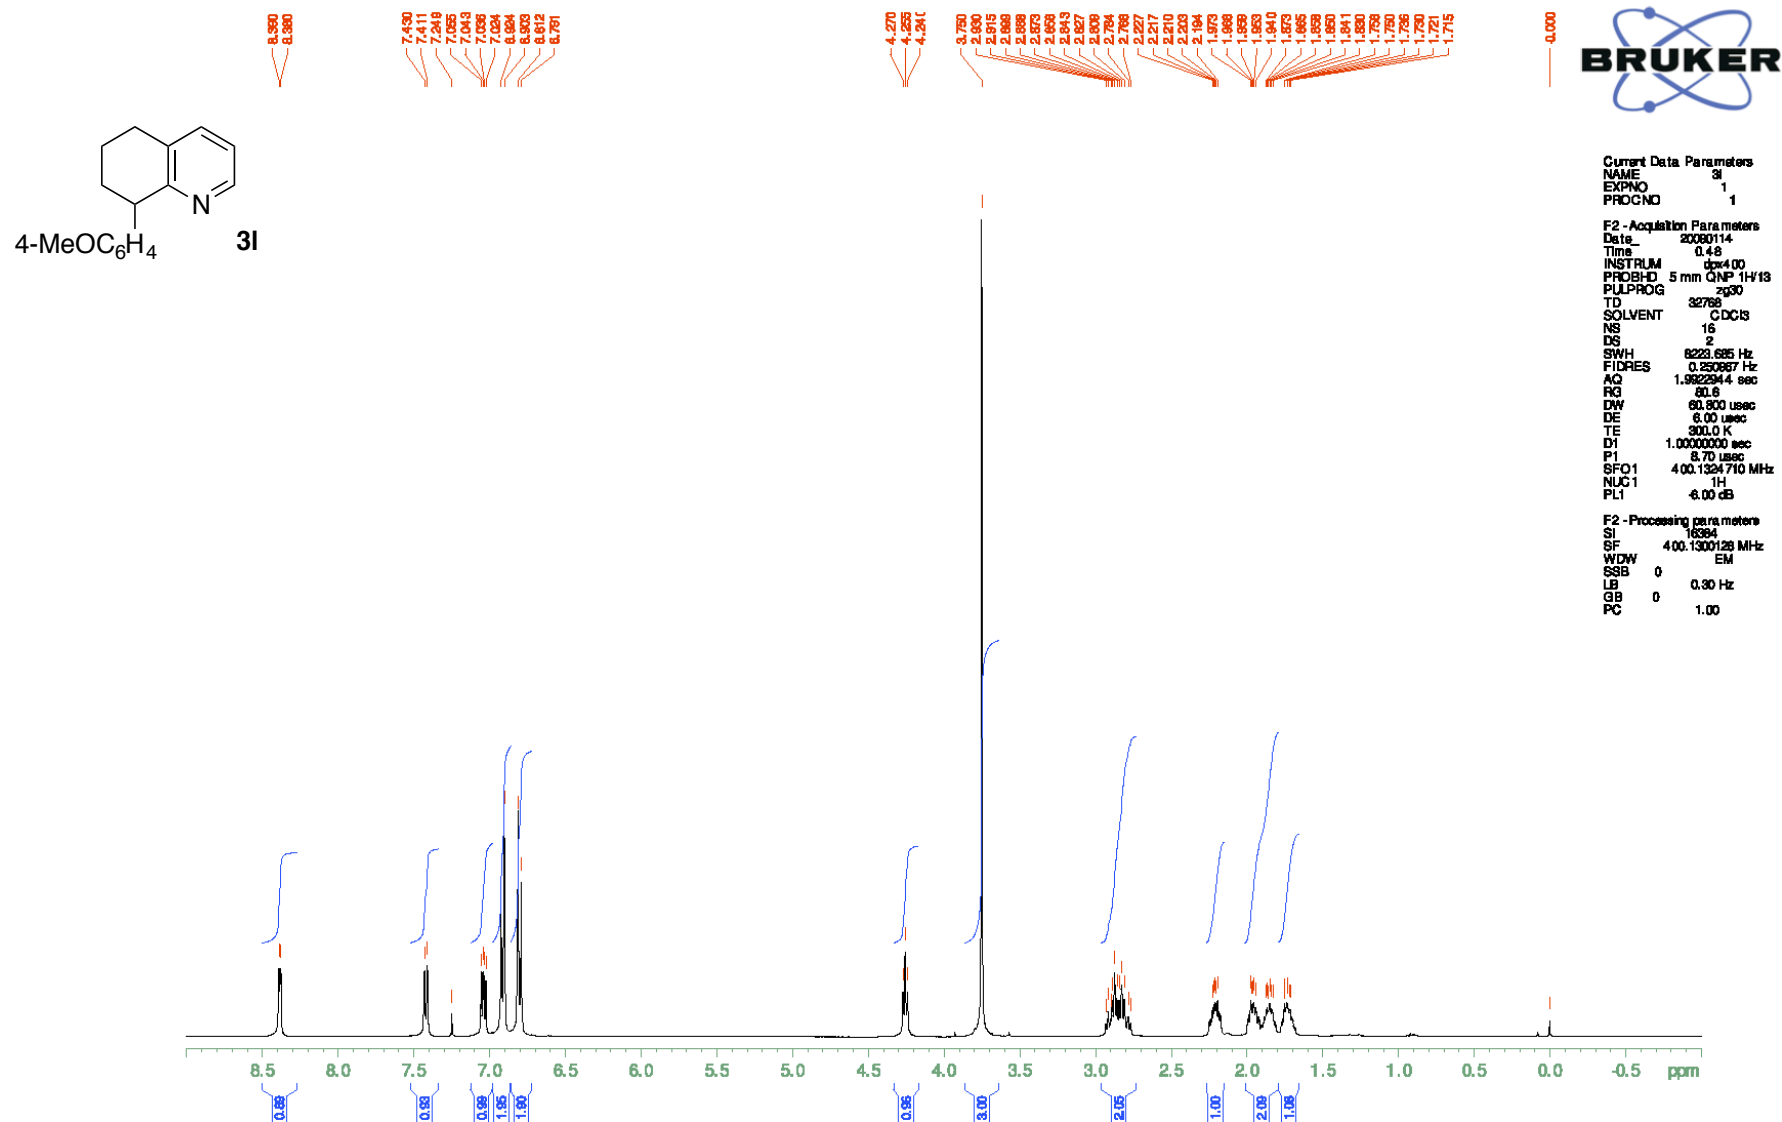

Figure S-37. <sup>1</sup>H NMR spectrum (CDCl<sub>3</sub>) of **3I**.

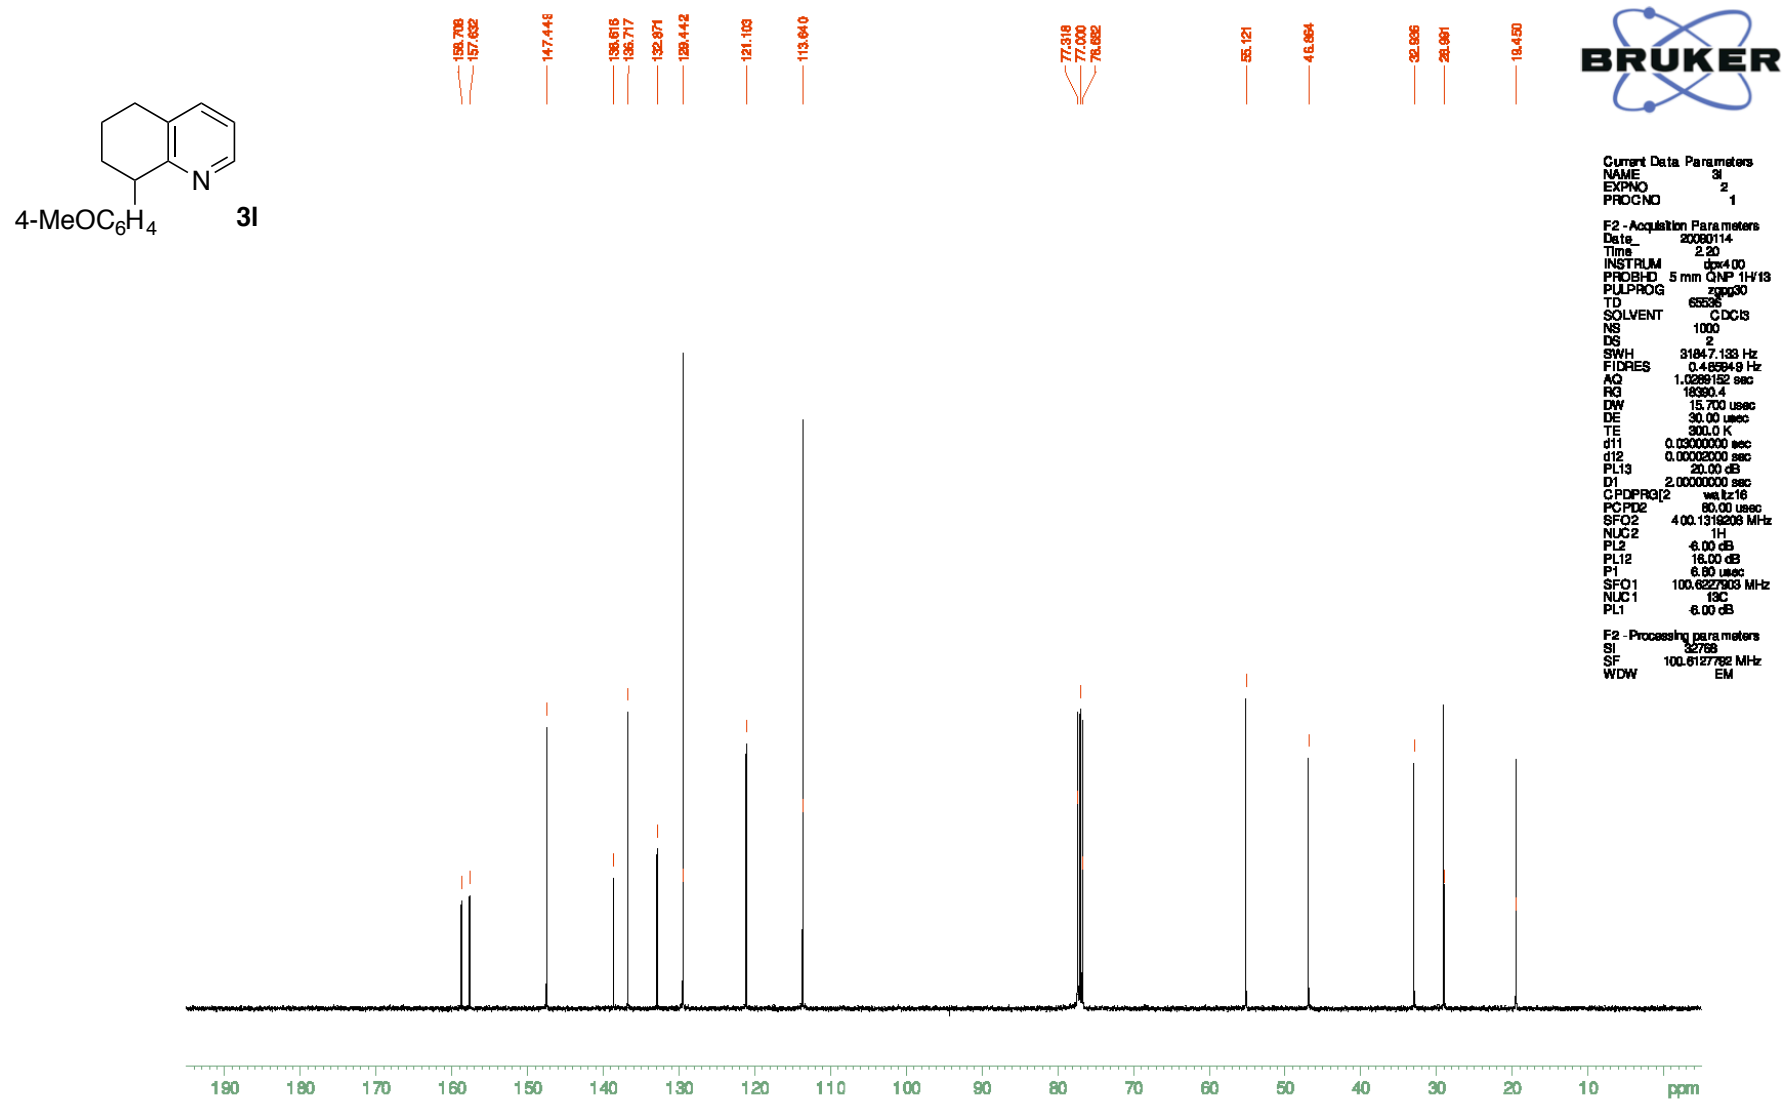

Figure S-38.  $^{13}\text{C} \{^1\text{H}\}$  NMR spectrum ( $\text{CDCl}_3$ ) of **3I**.



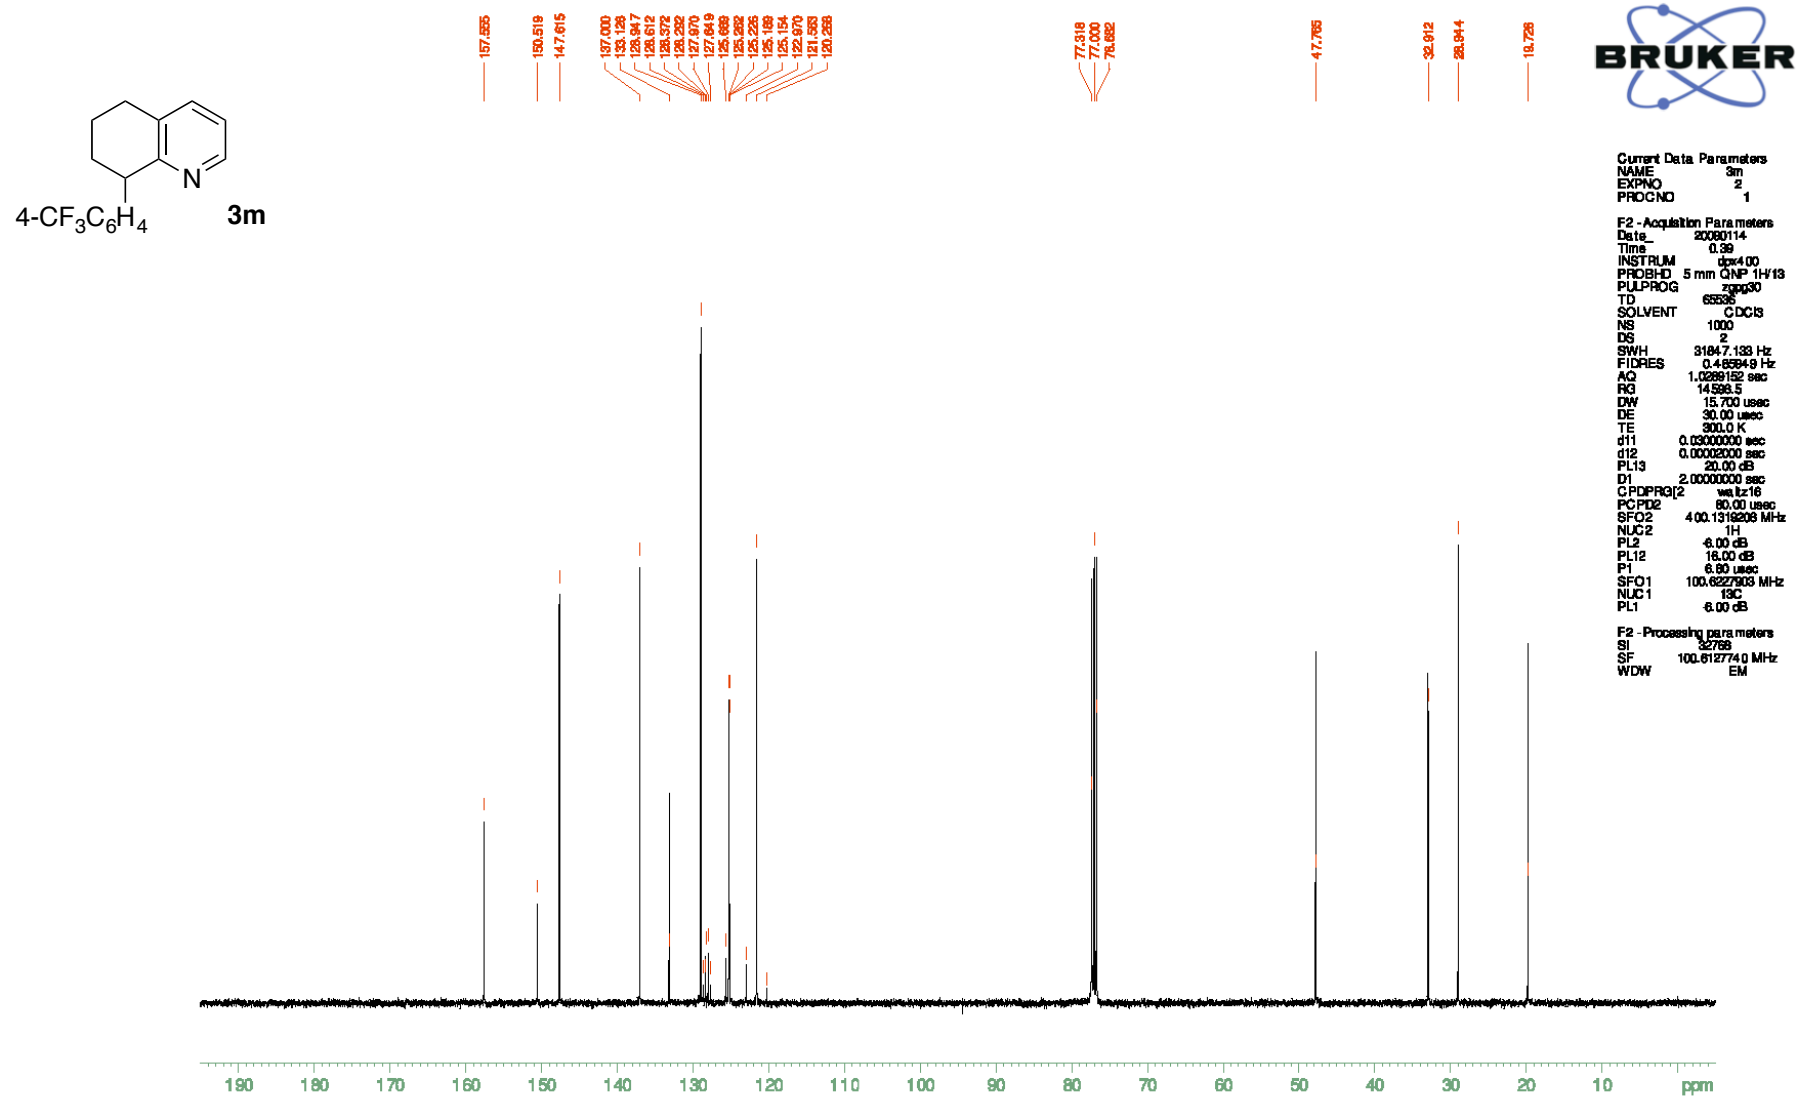

Figure S-40. <sup>13</sup>C {<sup>1</sup>H} NMR spectrum (CDCl<sub>3</sub>) of **3m**.

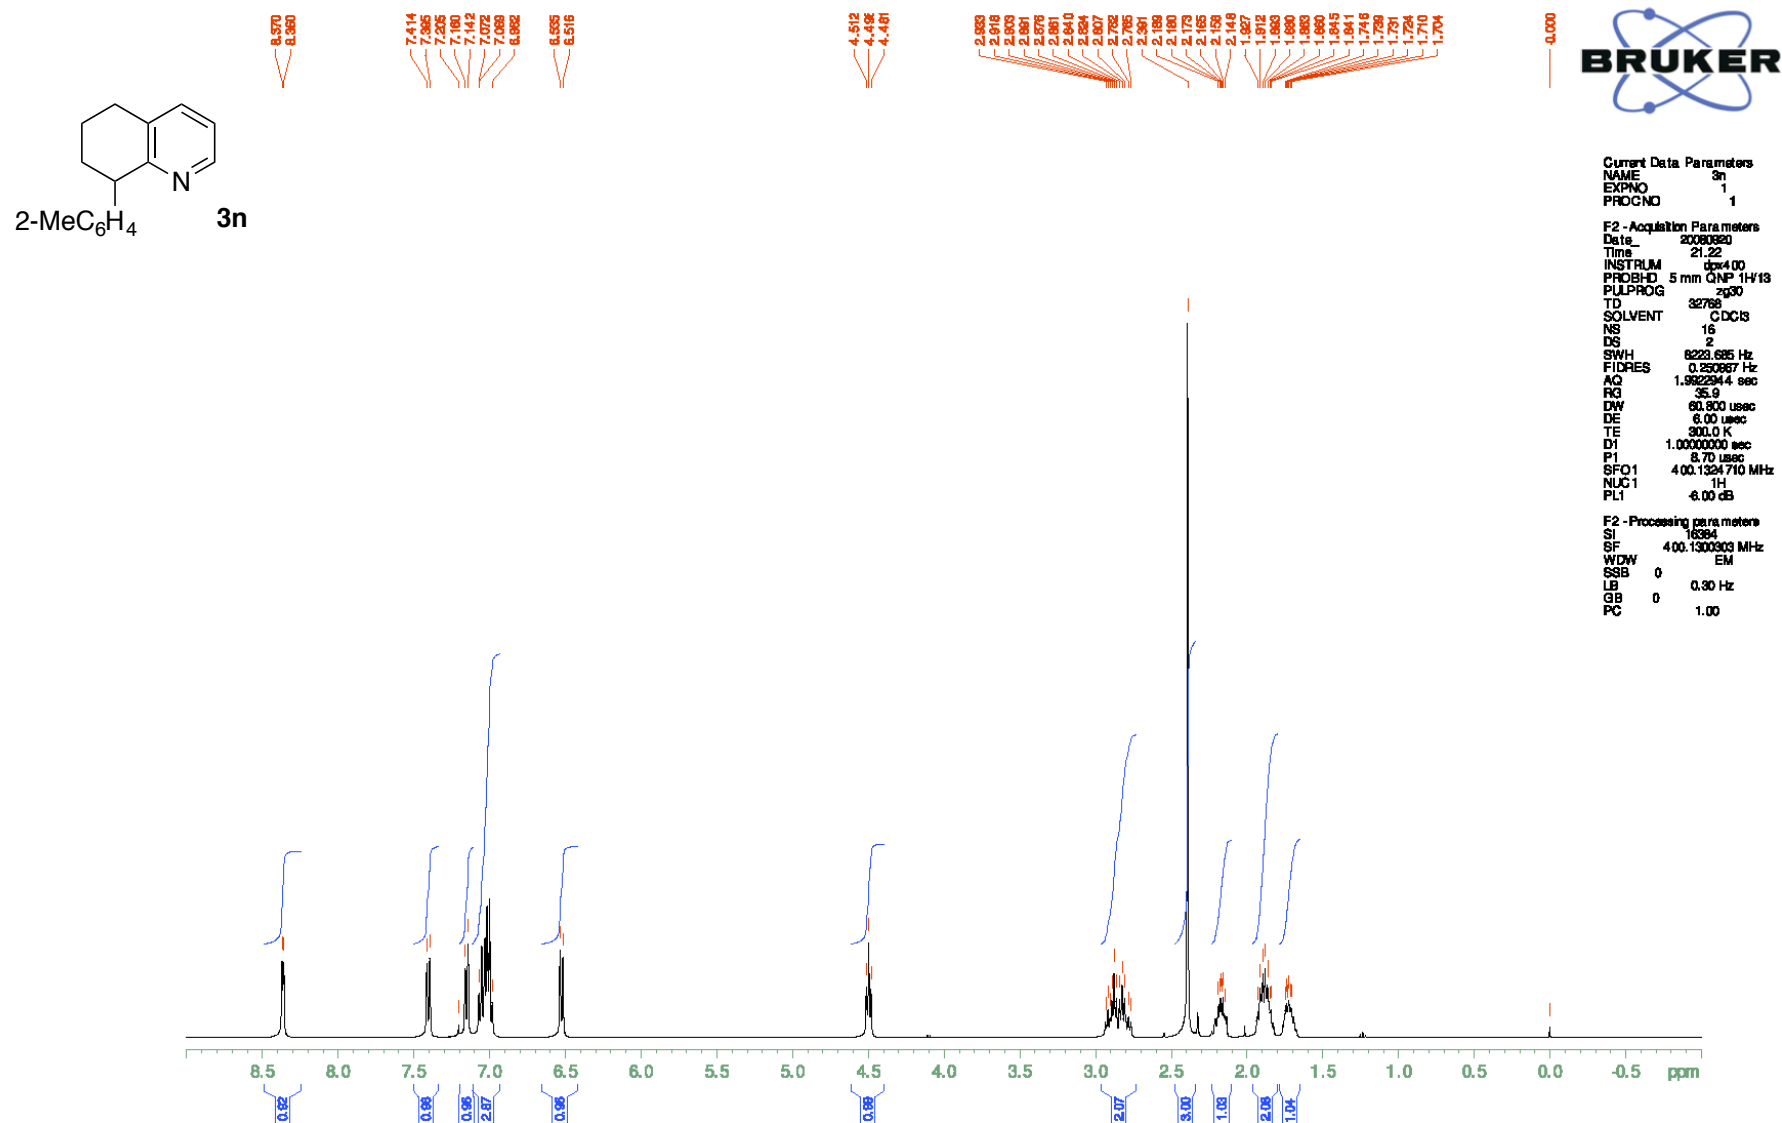

Figure S-41. <sup>1</sup>H NMR spectrum (CDCl<sub>3</sub>) of **3n**.

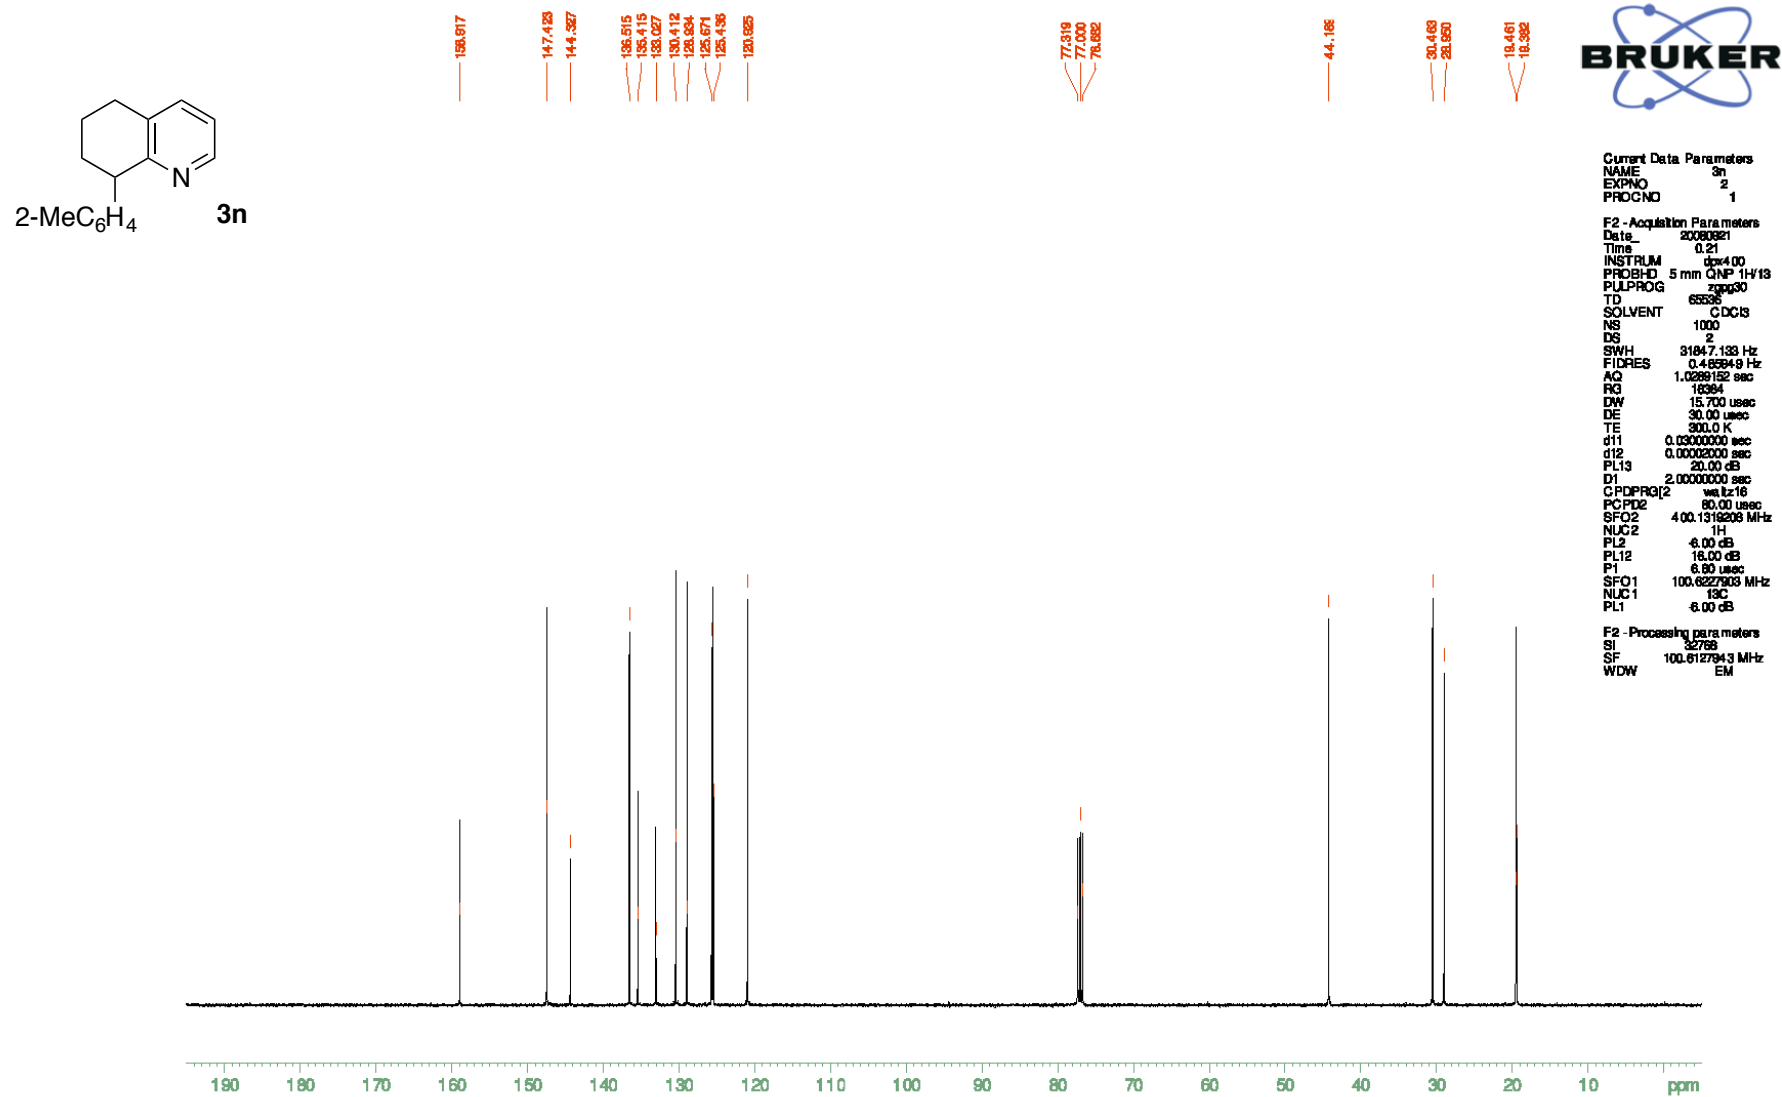

Figure S-42. <sup>13</sup>C {<sup>1</sup>H} NMR spectrum (CDCl<sub>3</sub>) of **3n**.

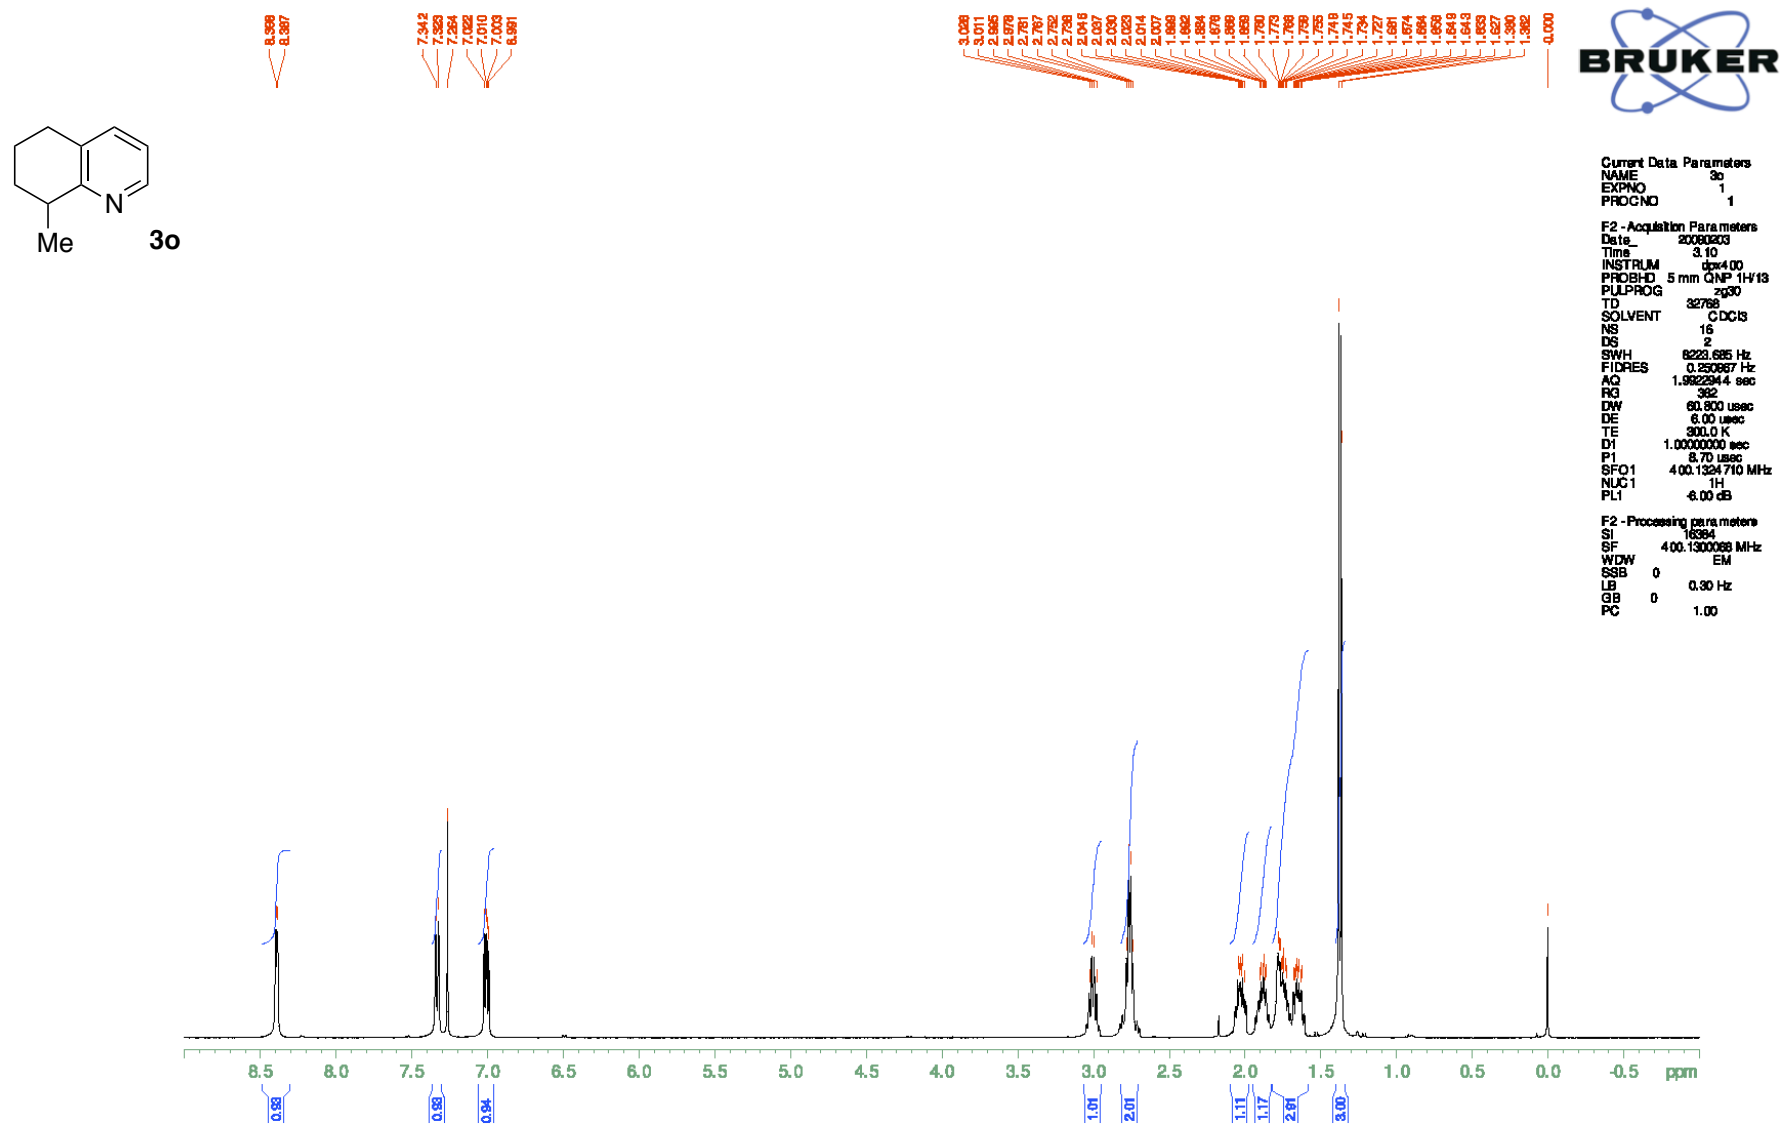

**Figure S-43.** <sup>1</sup>H NMR spectrum (CDCl<sub>3</sub>) of **3o**.

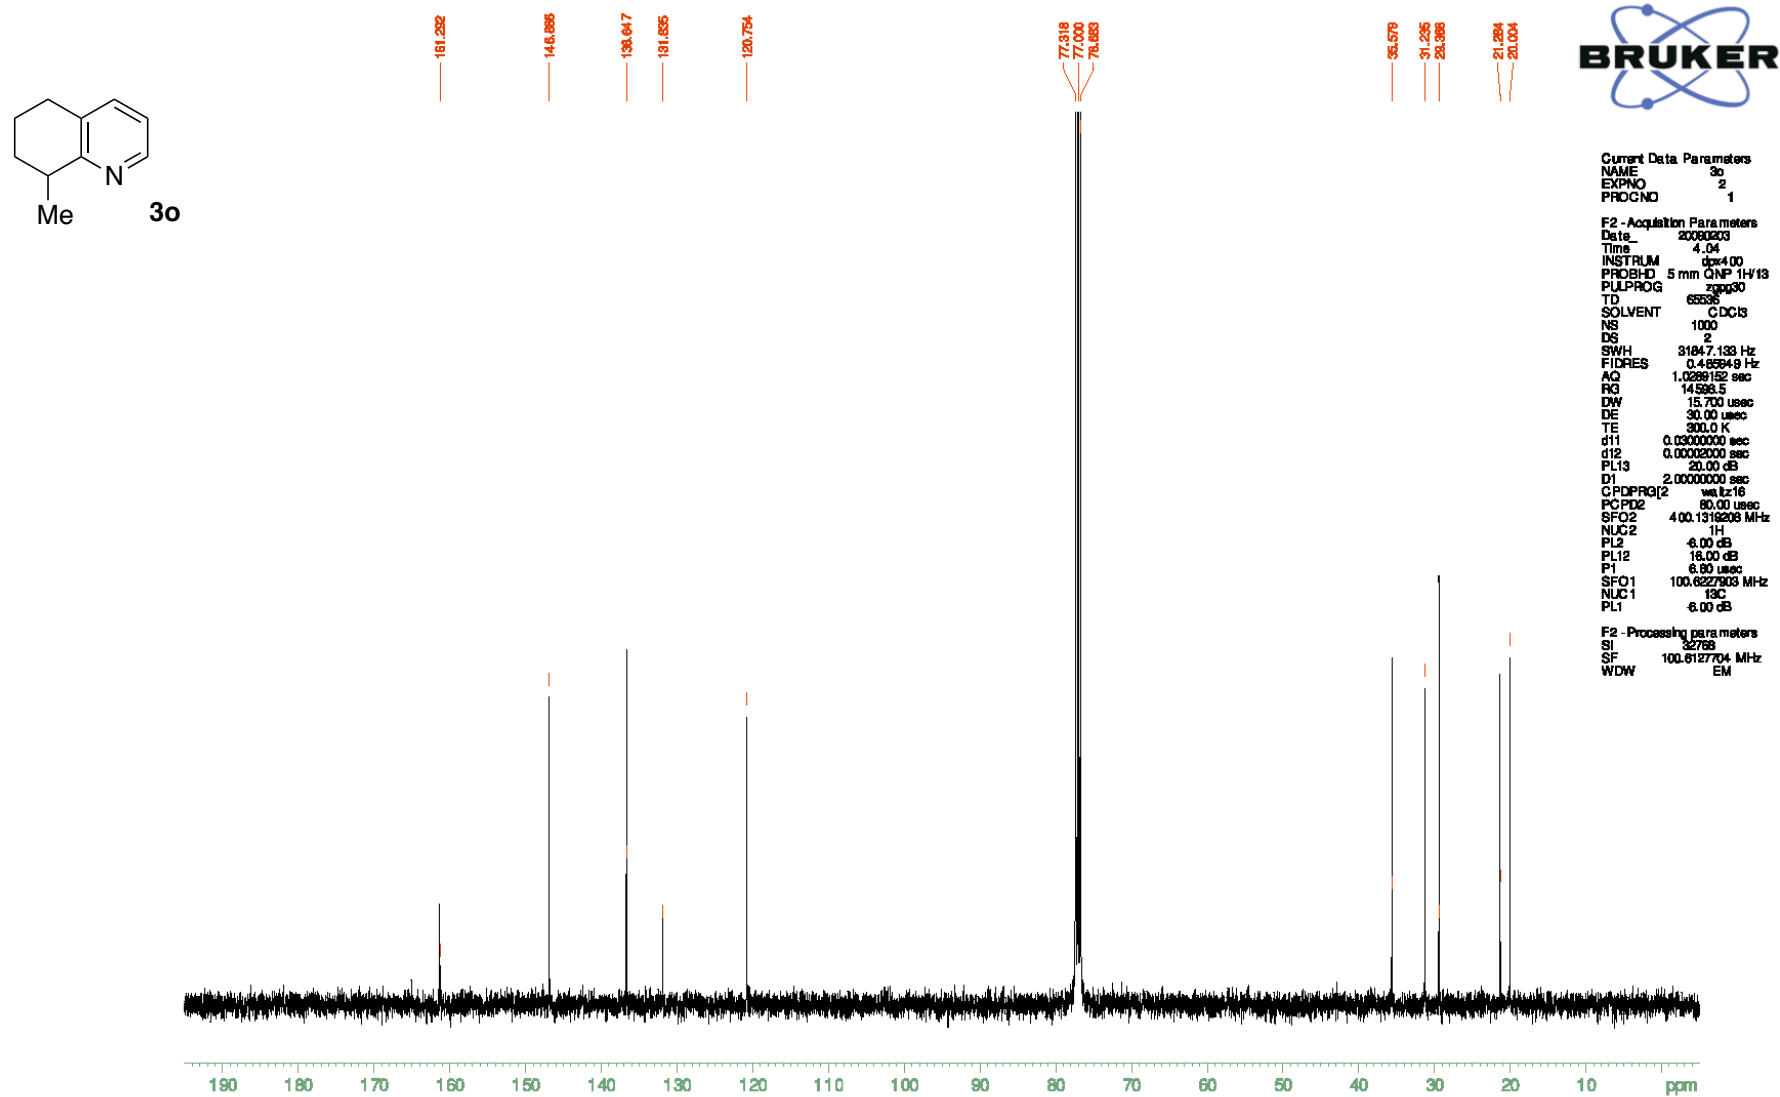

**Figure S-44.**  $^{13}\text{C} \{^1\text{H}\}$  NMR spectrum ( $\text{CDCl}_3$ ) of **3o**.





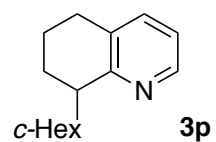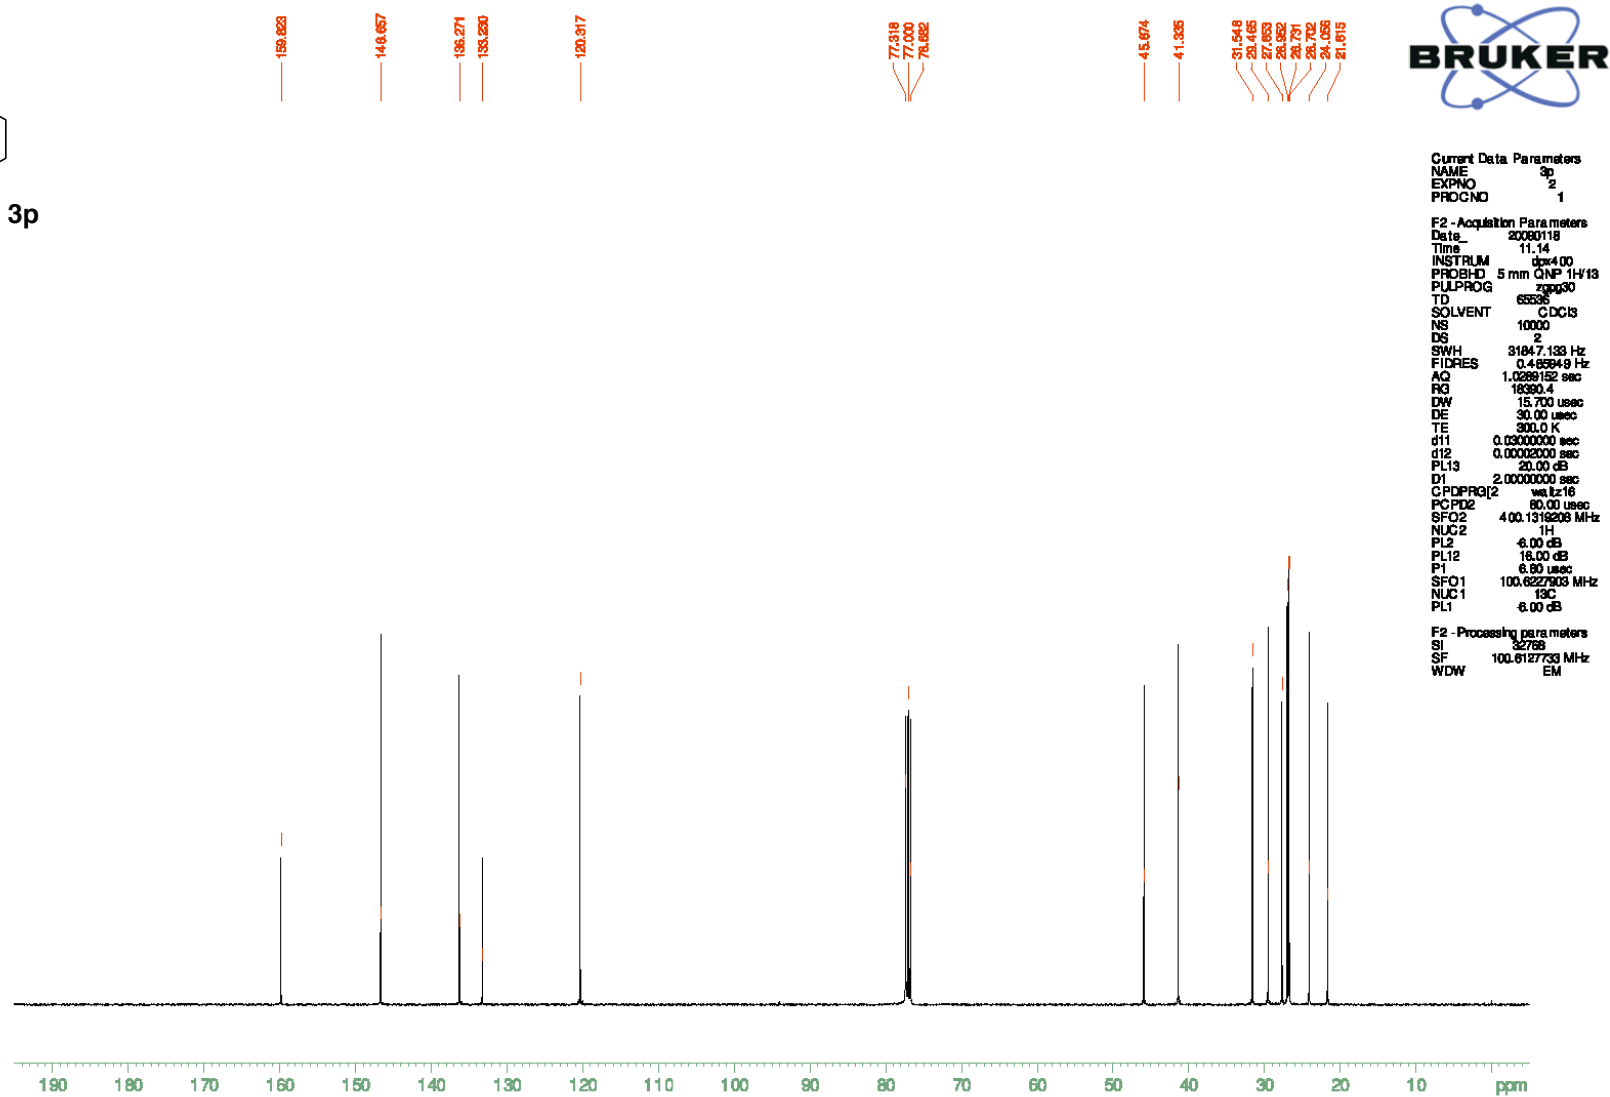

**Figure S-46.**  $^{13}\text{C} \{^1\text{H}\}$  NMR spectrum ( $\text{CDCl}_3$ ) of **3p**.

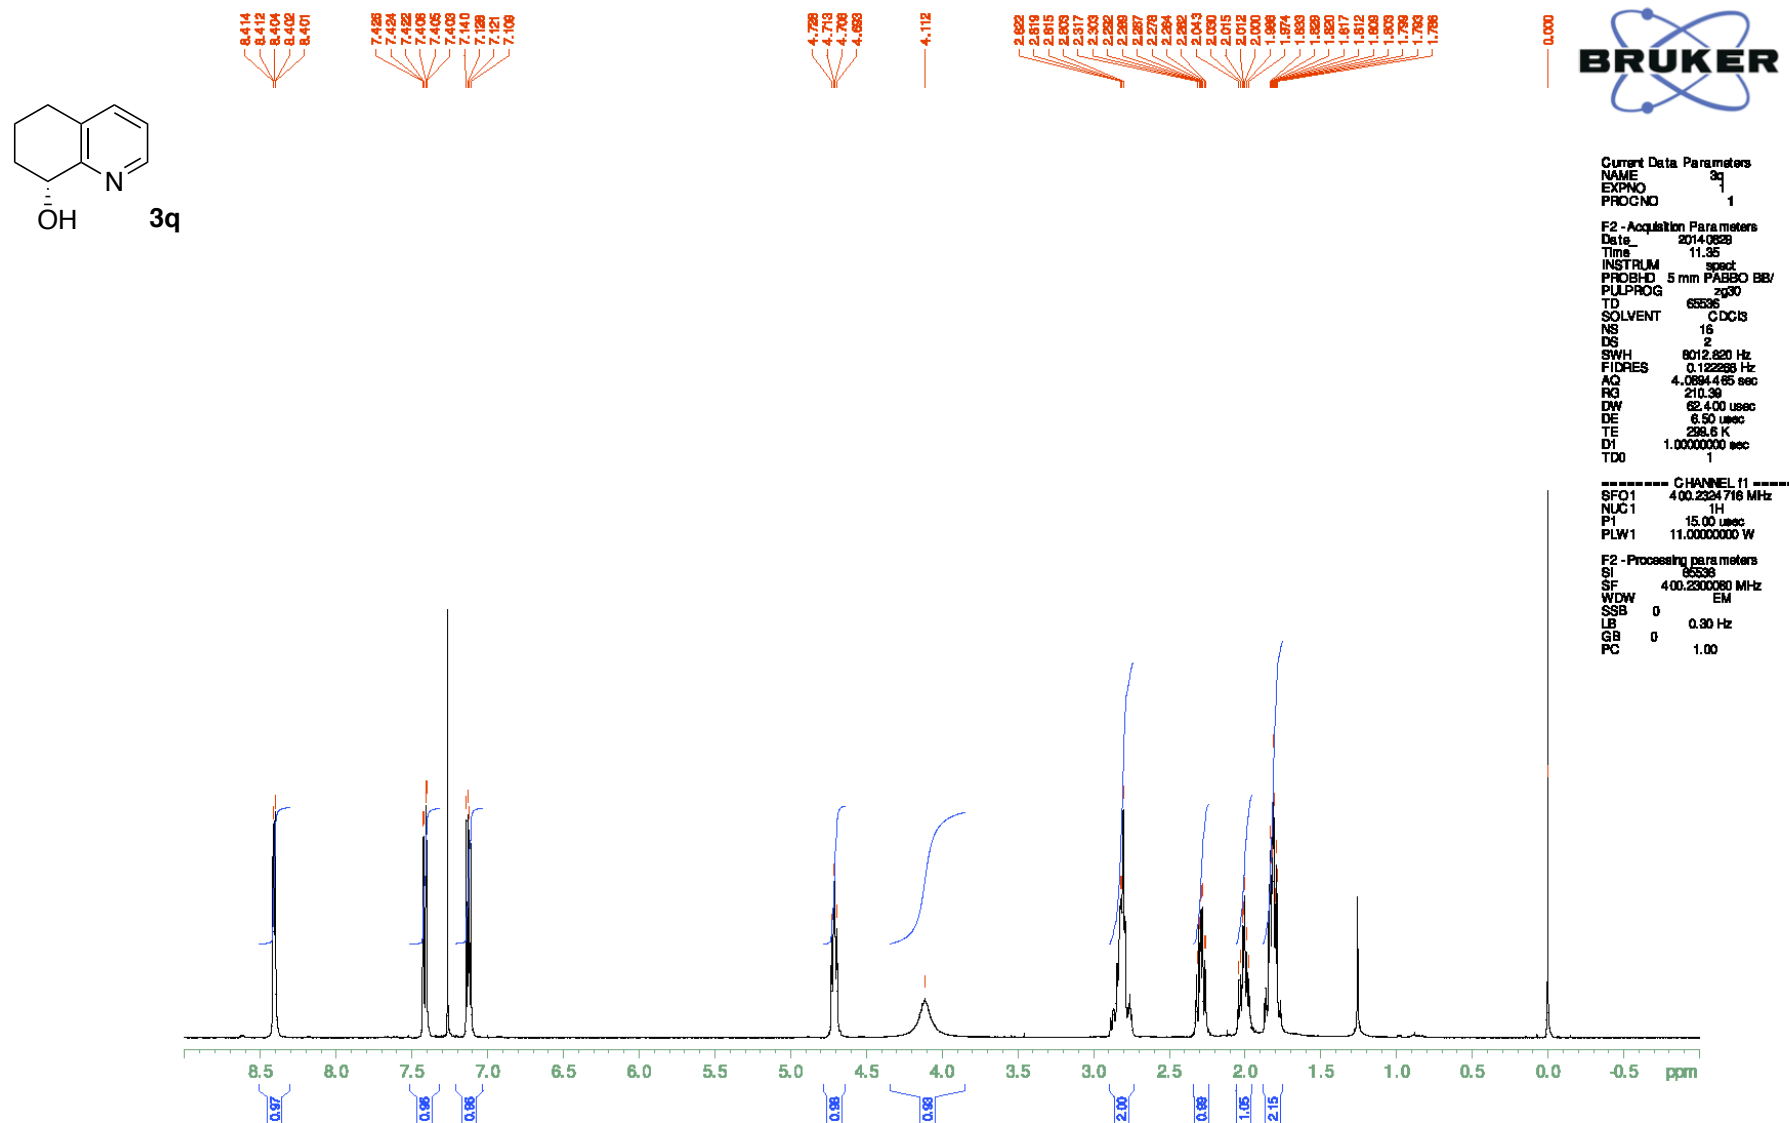

Figure S-47.  $^1\text{H}$  NMR spectrum ( $\text{CDCl}_3$ ) of **3q**.

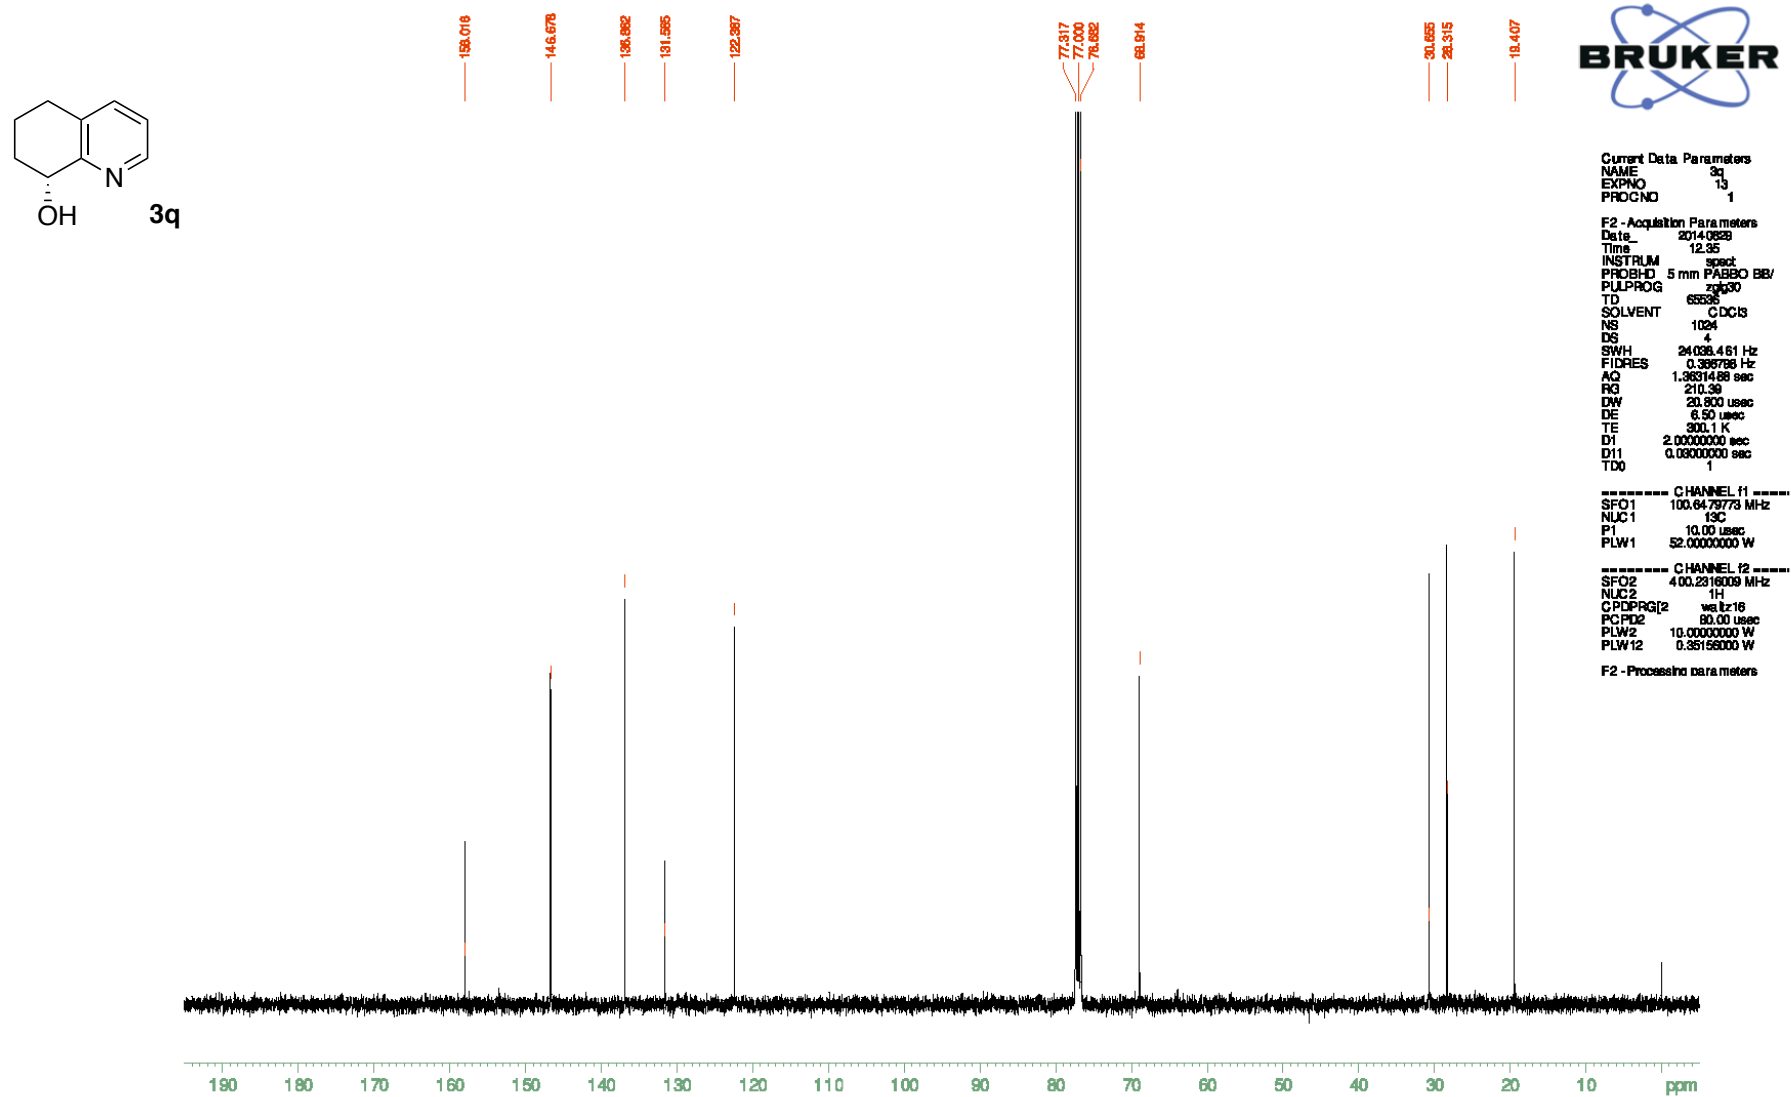

Figure S-48.  $^{13}\text{C}$   $\{^1\text{H}\}$  NMR spectrum ( $\text{CDCl}_3$ ) of **3q**.

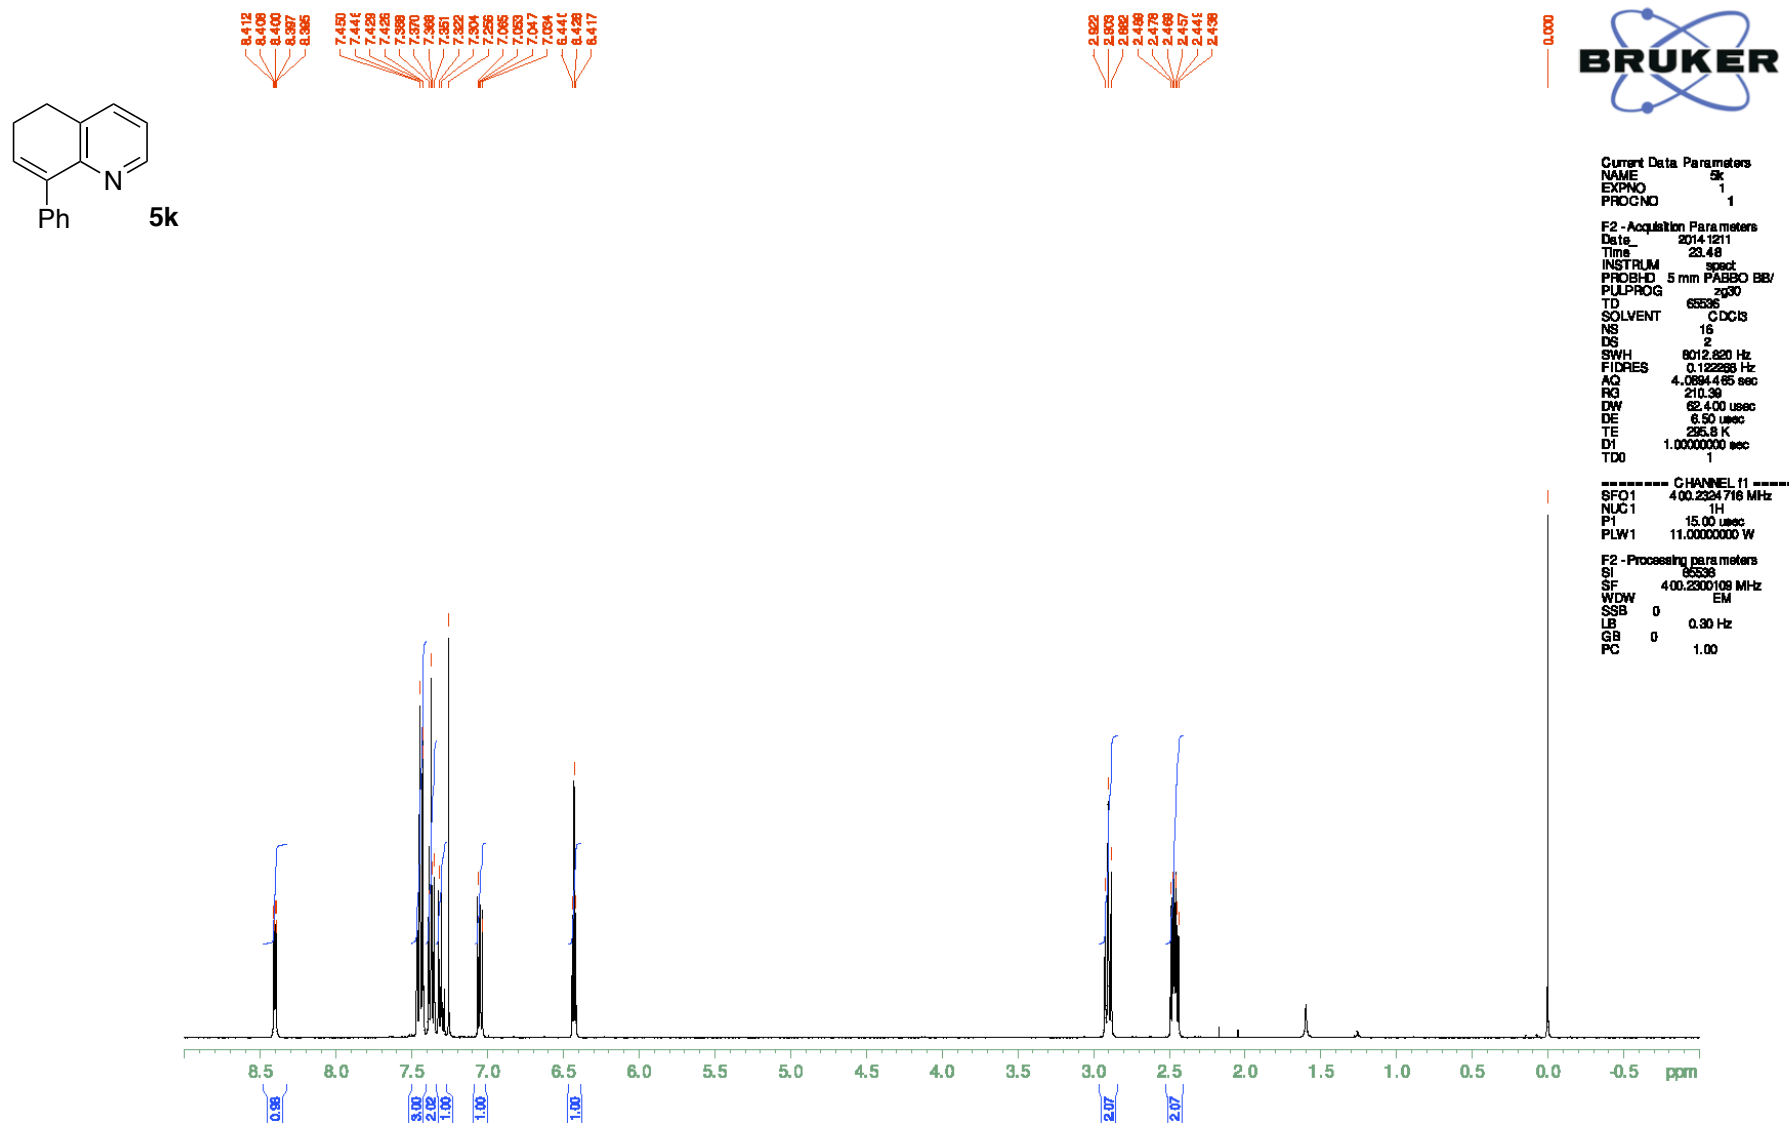

**Figure S-49.** <sup>1</sup>H NMR spectrum (CDCl<sub>3</sub>) of **5k**.

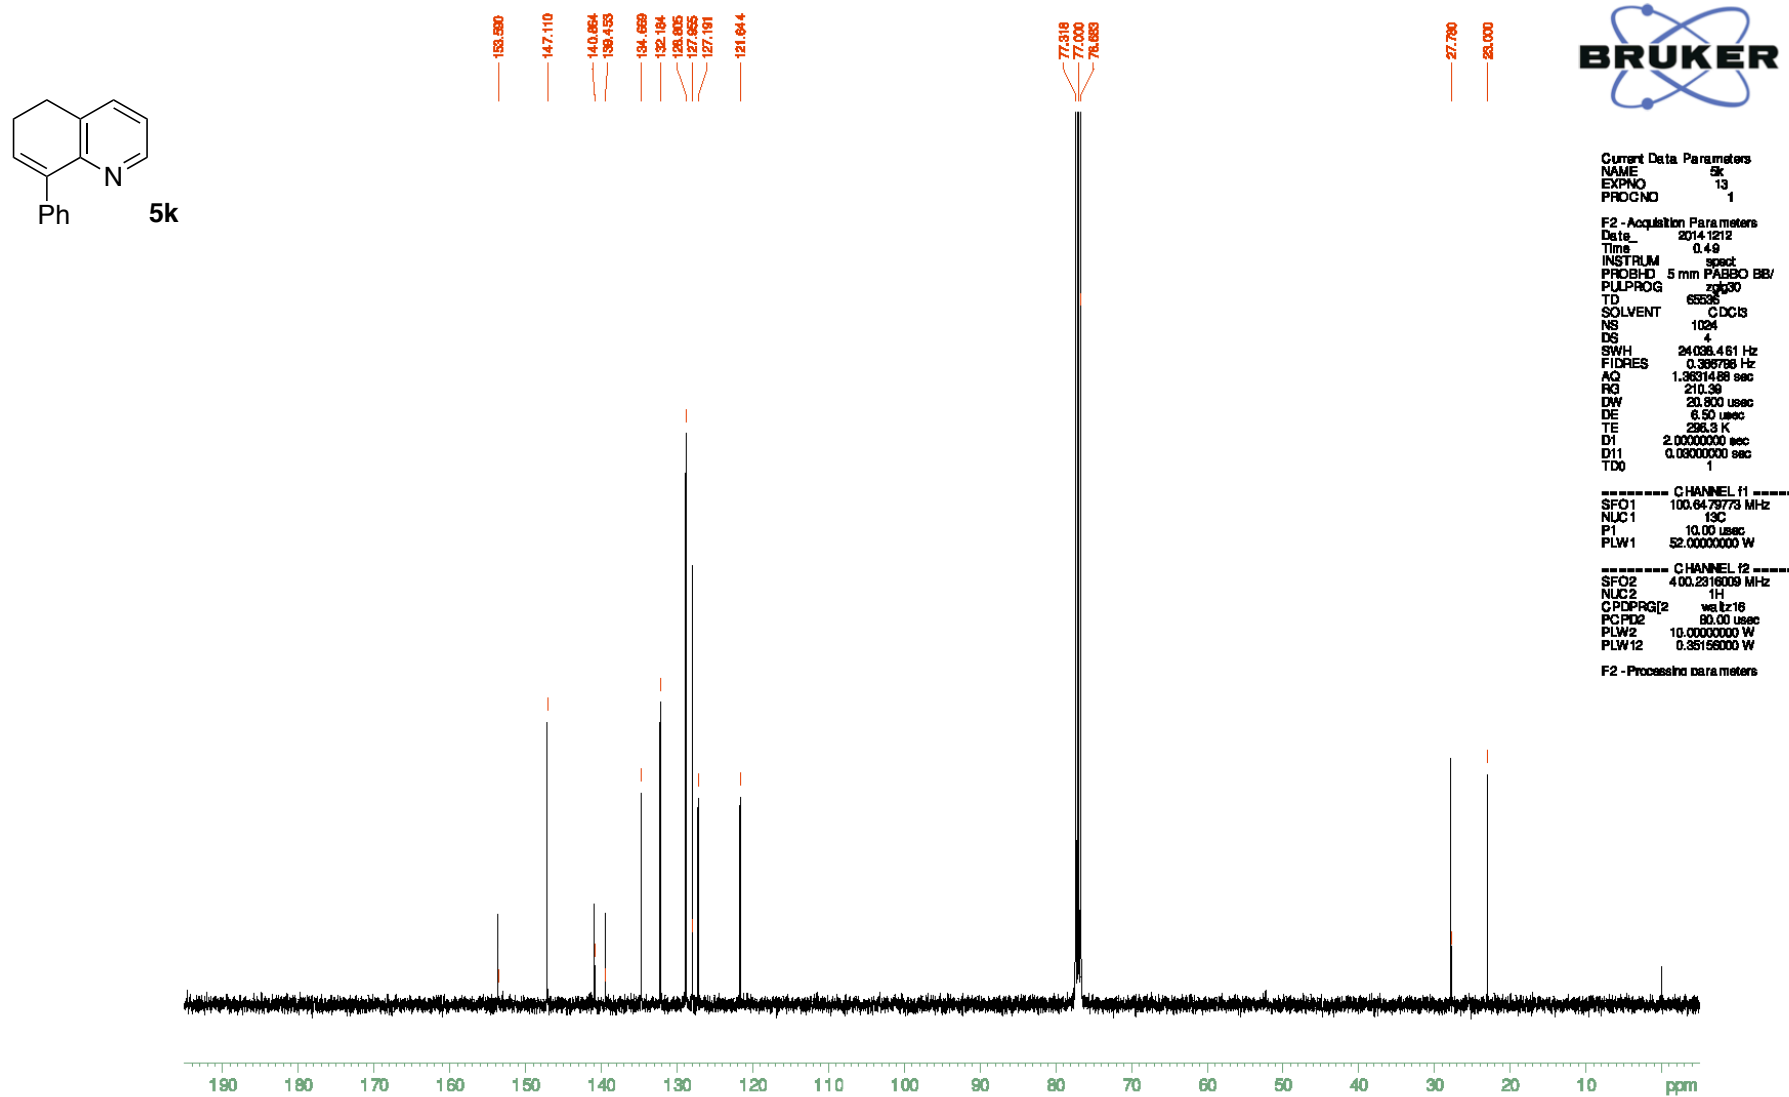

**Figure S-50.**  $^{13}\text{C} \{^1\text{H}\}$  NMR spectrum ( $\text{CDCl}_3$ ) of **5k**.

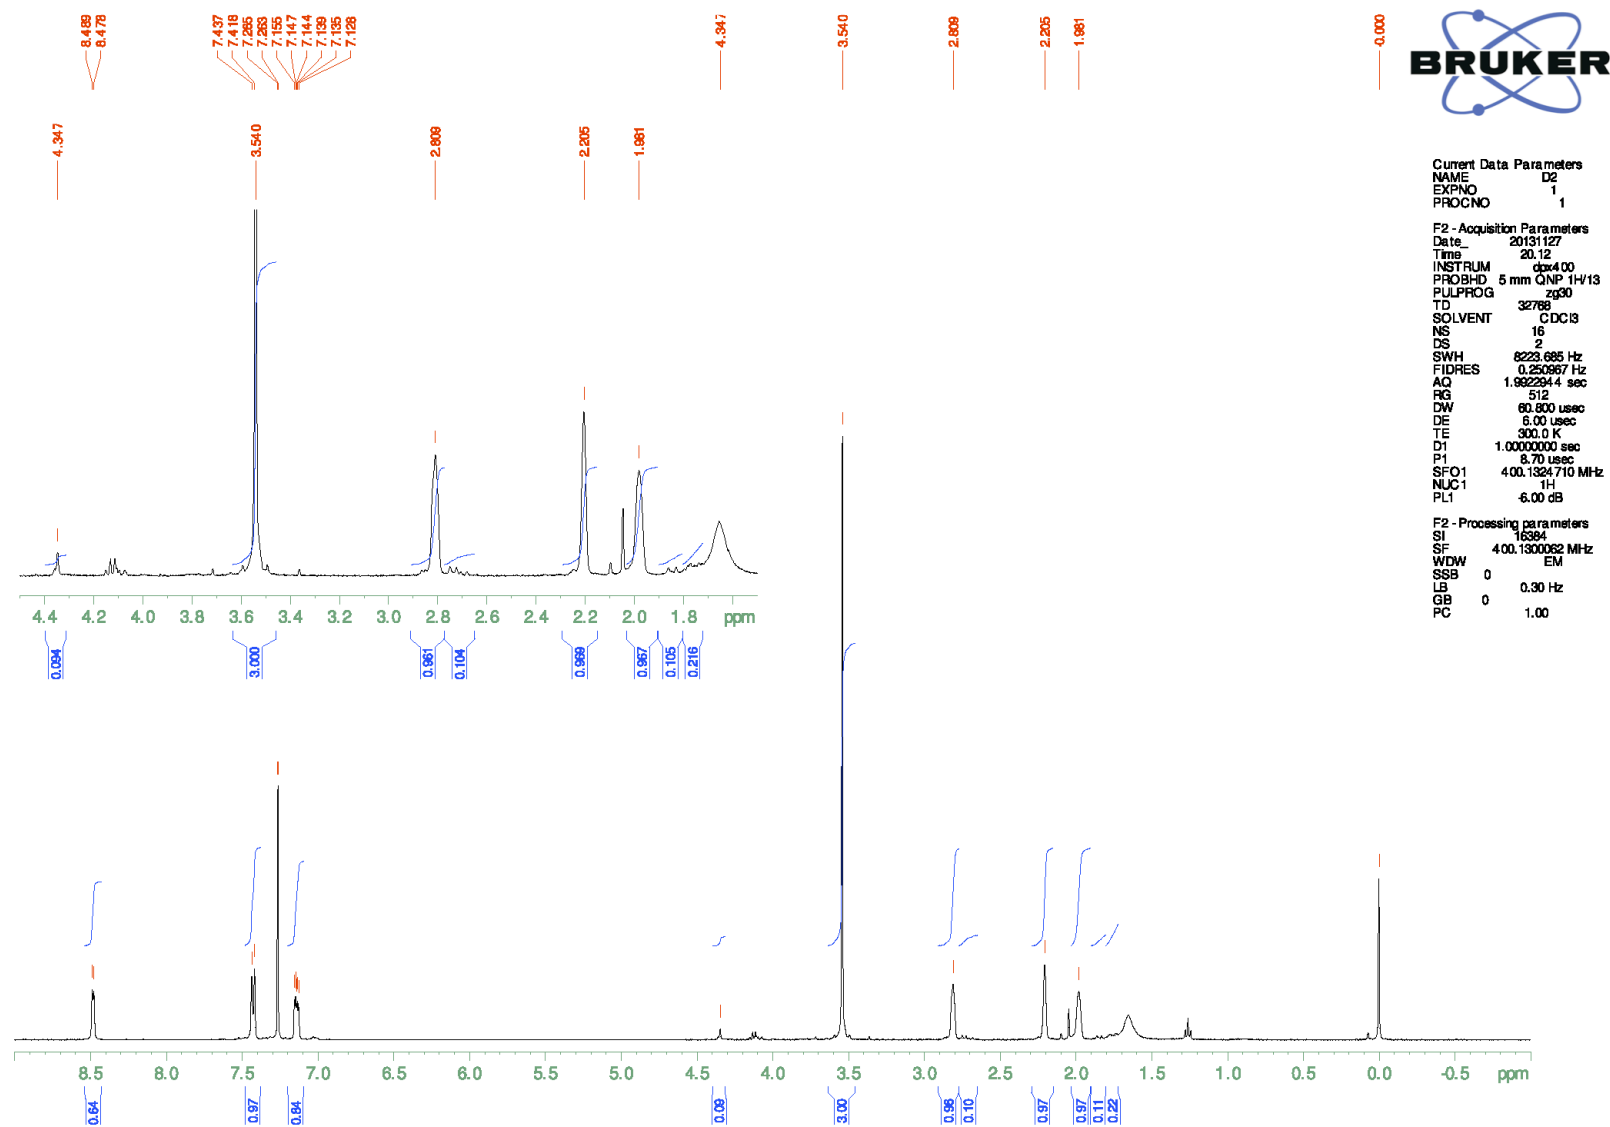

**Figure S-51.**  $^1\text{H}$  NMR spectrum ( $\text{CDCl}_3$ ) of **3i-d**, which was obtained from the deuteration of **2i**.

The charts of chiral HPLC analyses are given in the following pages. The translation of the Japanese words in column headings is given in figures below.

### Type 1

| Results |          | Name of peak |                |                        | Calibration | Symmetry Separation |       |       |
|---------|----------|--------------|----------------|------------------------|-------------|---------------------|-------|-------|
| 計算結果    | Rt (min) | ピーク名         | Integral<br>面積 | Integral (%)<br>面積 (%) |             | NTP                 | 対称性   | 分離度   |
| No. 1   | 9.51     |              | 49055.200      | 50.9759                | 定量結果        | 7810.3              | 1.314 | 2.777 |
| 2       | 10.76    |              | 47177.000      | 49.0241                | -----       | 8384.9              | 1.276 | ----- |
|         |          |              | 96232.200      | 100.0000               |             |                     |       |       |

### Type 2

| 3: 268 nm, 4 nm | 結果      | Name of peak | Retention time | Integral | Integral, % | Baseline code |
|-----------------|---------|--------------|----------------|----------|-------------|---------------|
| Pk #            | Results | 名前           | 保持時間           | 面積       | 面積%         | ピークコード        |
| 1               |         |              | 15.05          | 13076881 | 34.594      | BI            |
| 2               |         |              | 17.12          | 24723711 | 65.406      | BI            |
| トータル<br>Total   |         |              |                | 37800592 | 100.000     |               |



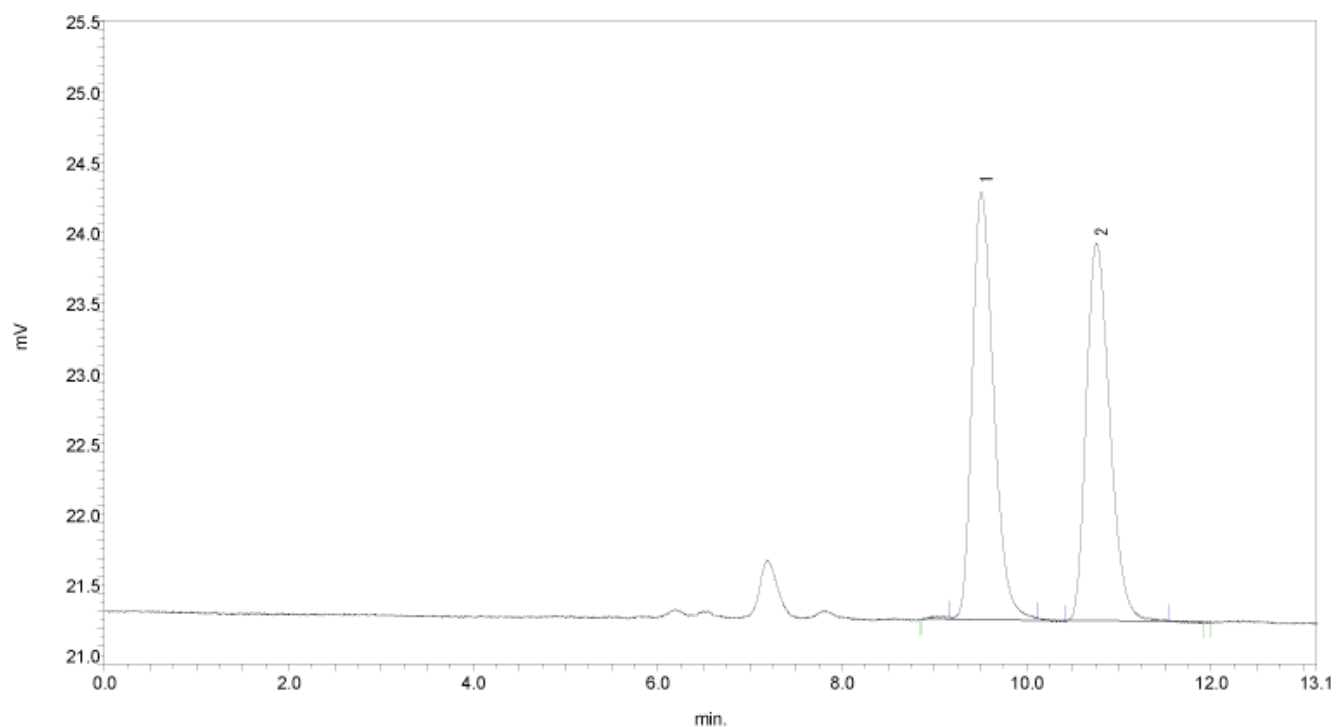

| 計算結果 |         |      |           |          |      |      |        |       |
|------|---------|------|-----------|----------|------|------|--------|-------|
| No.  | Rt(min) | ピーク名 | 面積        | 面積(%)    | 高さ   | 定量結果 | NTP    | 対称性   |
| 1    | 9.51    |      | 49055.200 | 50.9759  | 3039 |      | 7810.3 | 1.314 |
| 2    | 10.76   |      | 47177.000 | 49.0241  | 2676 |      | 8384.9 | 1.276 |
|      |         |      | 96232.200 | 100.0000 | 5715 |      |        | 2.777 |

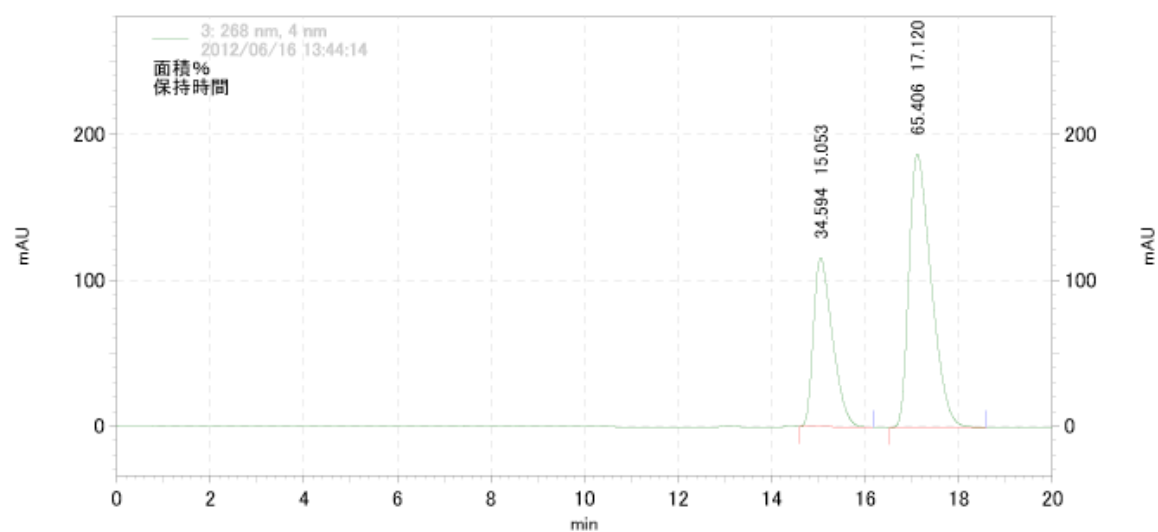

| 3: 268 nm, 4 nm結果 |       |    |       |          |         |
|-------------------|-------|----|-------|----------|---------|
| 結果                | ピーク # | 名前 | 保持時間  | 面積       | 面積%     |
|                   | 1     |    | 15.05 | 13076881 | 34.594  |
|                   | 2     |    | 17.12 | 24723711 | 65.406  |
|                   |       |    |       |          | BI      |
|                   |       |    |       |          | BI      |
| トータル              |       |    |       | 37800592 | 100.000 |

**Figure S-52.** The charts of chiral HPLC analyses of racemic **3b** (upper), and the hydrogenation product obtained from entry 6 of Table 1 (lower).

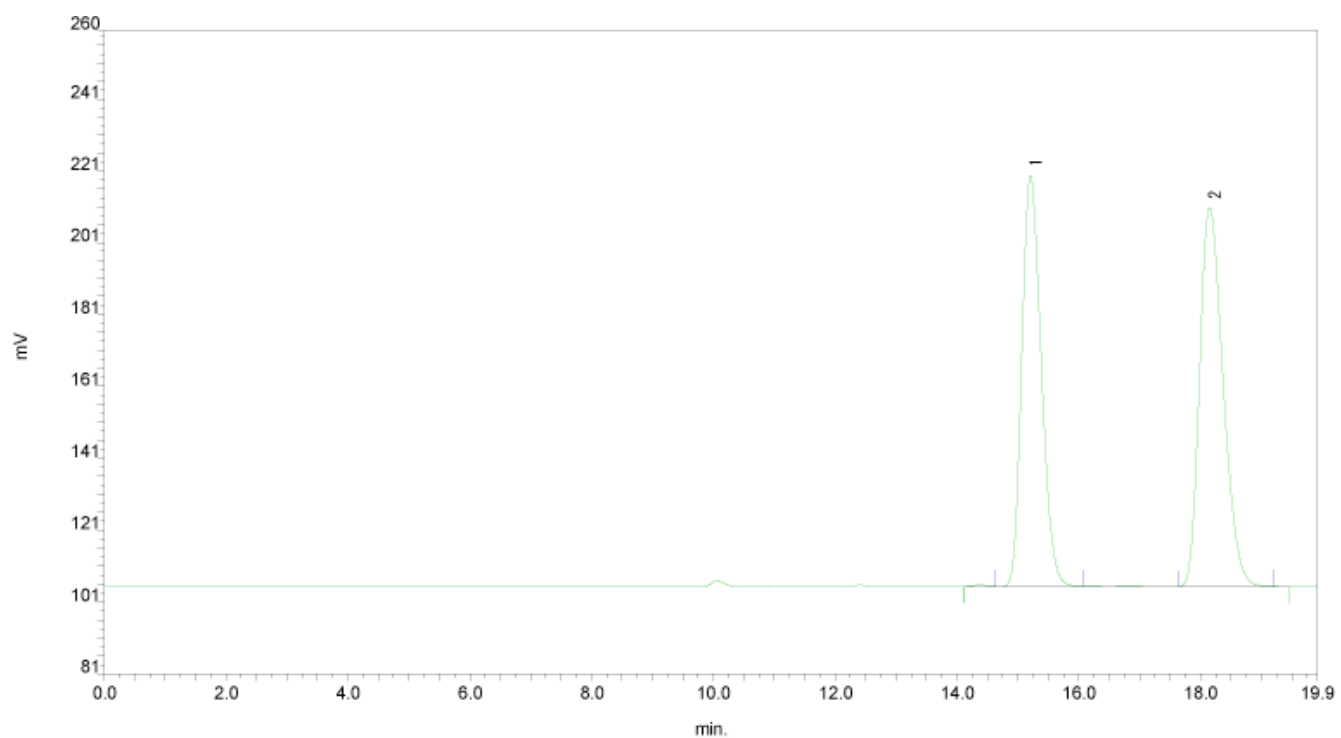

| 計算結果 |         |      |             |          |        |      |         |             |
|------|---------|------|-------------|----------|--------|------|---------|-------------|
| No.  | Rt(min) | ピーク名 | 面積          | 面積(%)    | 高さ     | 定量結果 | NTP     | 対称性 分離度     |
| 1    | 15.21   |      | 2532306.200 | 47.2429  | 114456 | —    | 10604.8 | 1.208 4.490 |
| 2    | 18.15   |      | 2827872.800 | 52.7571  | 105411 | —    | 10194.3 | 1.288 —     |
|      |         |      | 5360179.000 | 100.0000 | 219867 |      |         |             |

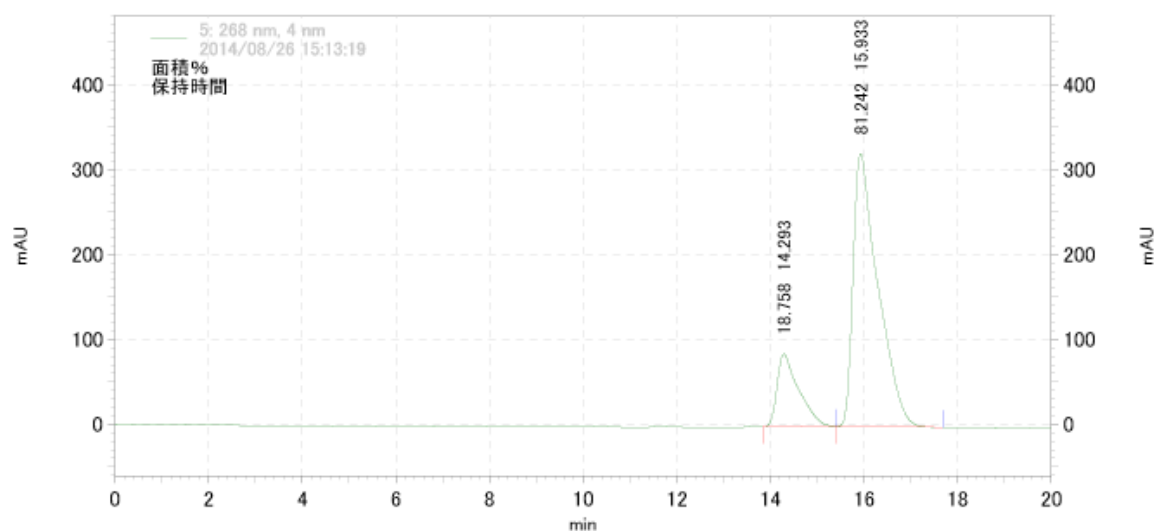

| 5: 268 nm, 4 nm結果 |    |       |          |         |         |
|-------------------|----|-------|----------|---------|---------|
| Pk #              | 名前 | 保持時間  | 面積       | 面積%     | ピークコメント |
| 1                 |    | 14.29 | 10971653 | 18.758  | BV      |
| 2                 |    | 15.93 | 47518577 | 81.242  | VI      |
| トータル              |    |       | 58490230 | 100.000 |         |

**Figure S-53.** The charts of chiral HPLC analyses of racemic **3c** (upper), and the hydrogenation product obtained from entry 12 of Table 1 (lower).

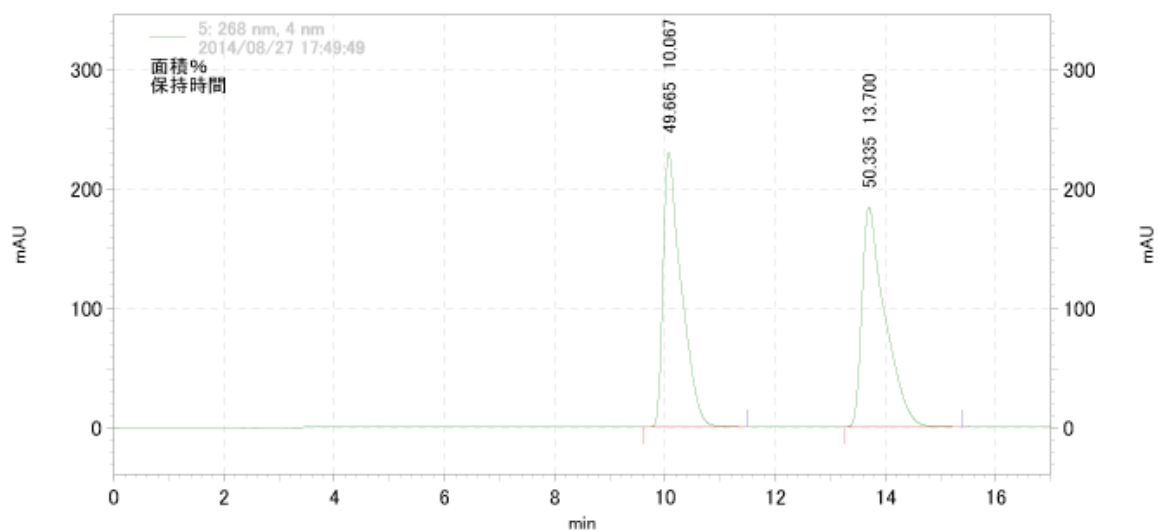

5: 268 nm, 4 nm結果

| Pk # | 名前 | 保持時間  | 面積       | 面積%     | ヘーラインコート |
|------|----|-------|----------|---------|----------|
| 1    |    | 10.07 | 21121989 | 49.665  | BI       |
| 2    |    | 13.70 | 21407248 | 50.335  | BI       |
| トータル |    |       | 42529237 | 100.000 |          |

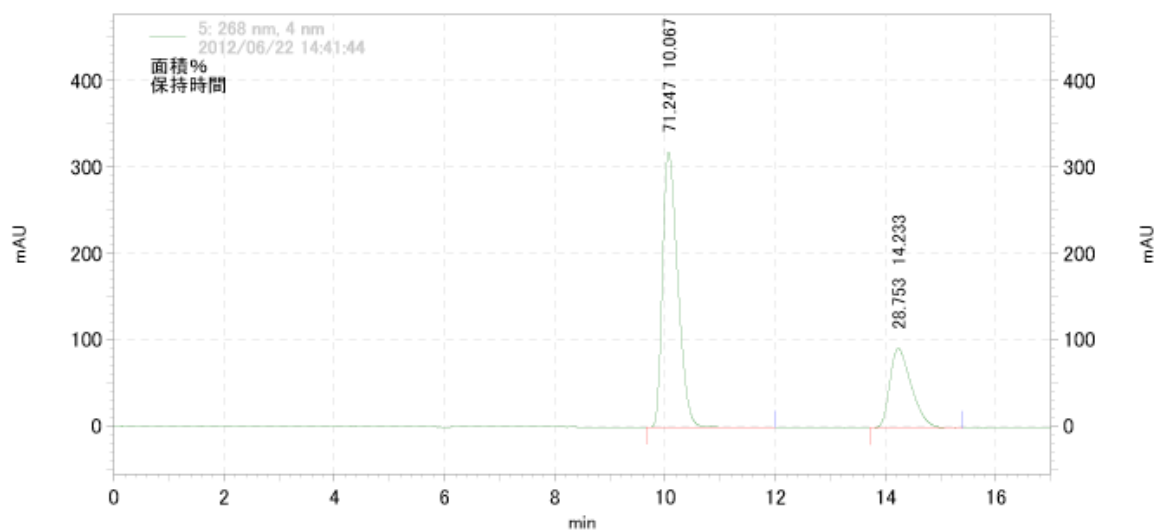

5: 268 nm, 4 nm結果

| Pk # | 名前 | 保持時間  | 面積       | 面積%     | ヘーラインコート |
|------|----|-------|----------|---------|----------|
| 1    |    | 10.07 | 24592244 | 71.247  | BI       |
| 2    |    | 14.23 | 9924735  | 28.753  | BI       |
| トータル |    |       | 34516979 | 100.000 |          |

**Figure S-54.** The charts of chiral HPLC analyses of racemic **3f** (upper), and the hydrogenation product obtained from entry 3 of Table 2 (lower).

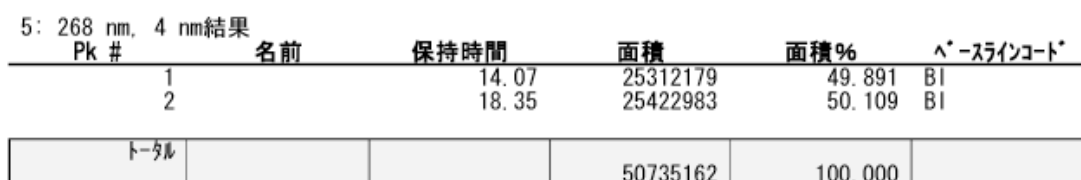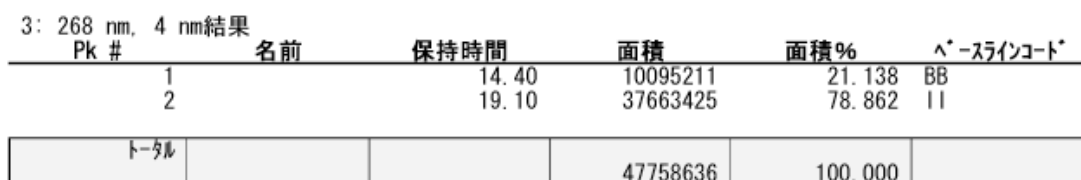

S72

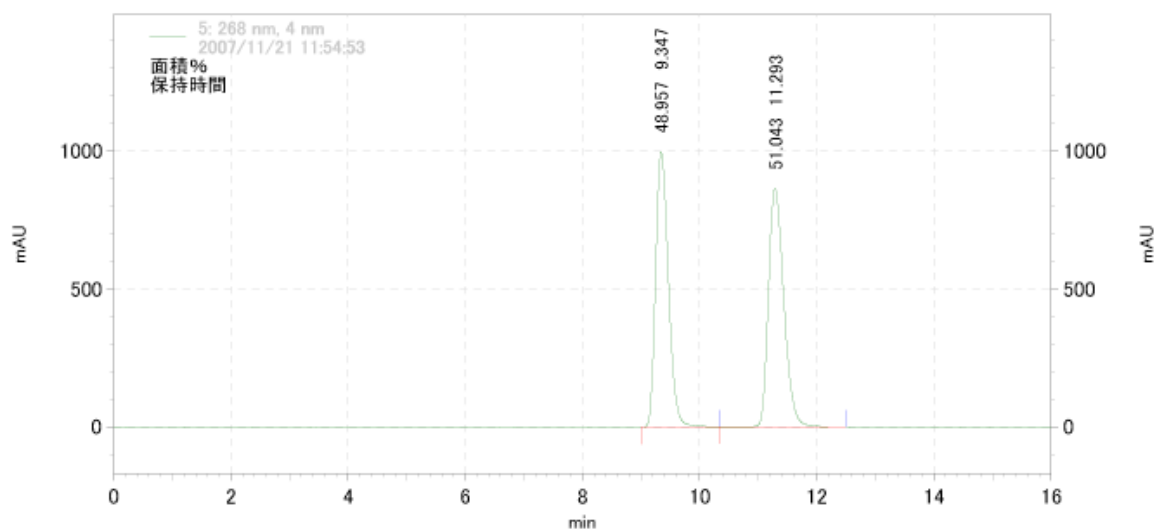

5: 268 nm, 4 nm結果

| Pk # | 名前 | 保持時間  | 面積        | 面積%     | ピークコード |
|------|----|-------|-----------|---------|--------|
| 1    |    | 9.35  | 60797360  | 48.957  | IV     |
| 2    |    | 11.29 | 63388247  | 51.043  | VI     |
| トータル |    |       | 124185607 | 100.000 |        |

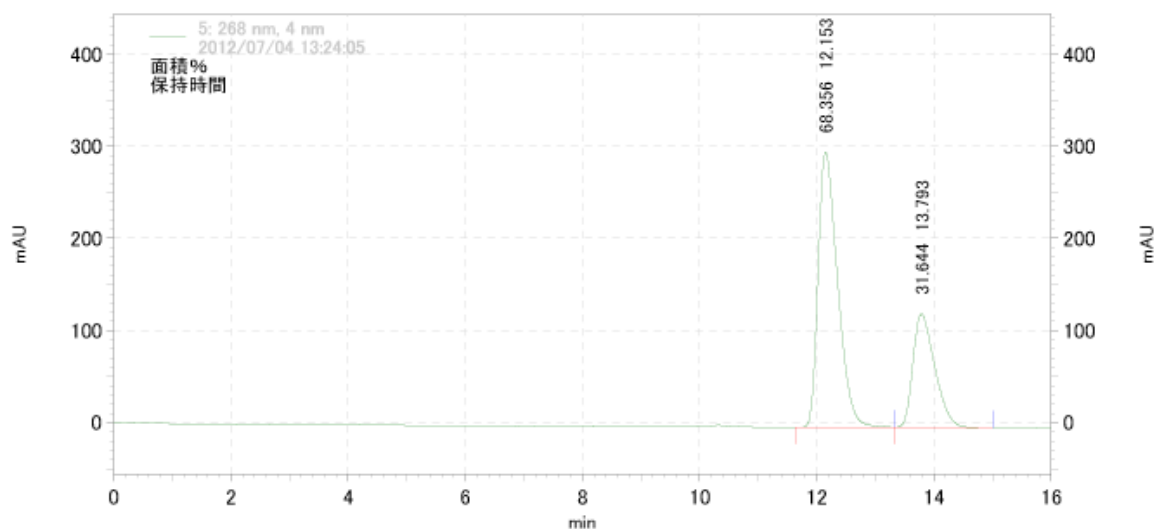

5: 268 nm, 4 nm結果

| Pk # | 名前 | 保持時間  | 面積       | 面積%     | ピークコード |
|------|----|-------|----------|---------|--------|
| 1    |    | 12.15 | 27610943 | 68.356  | BV     |
| 2    |    | 13.79 | 12781740 | 31.644  | VI     |
| トータル |    |       | 40392683 | 100.000 |        |

**Figure S-56.** The charts of chiral HPLC analyses of racemic **3h** (upper), and the hydrogenation product obtained from entry 5 of Table 2 (lower).

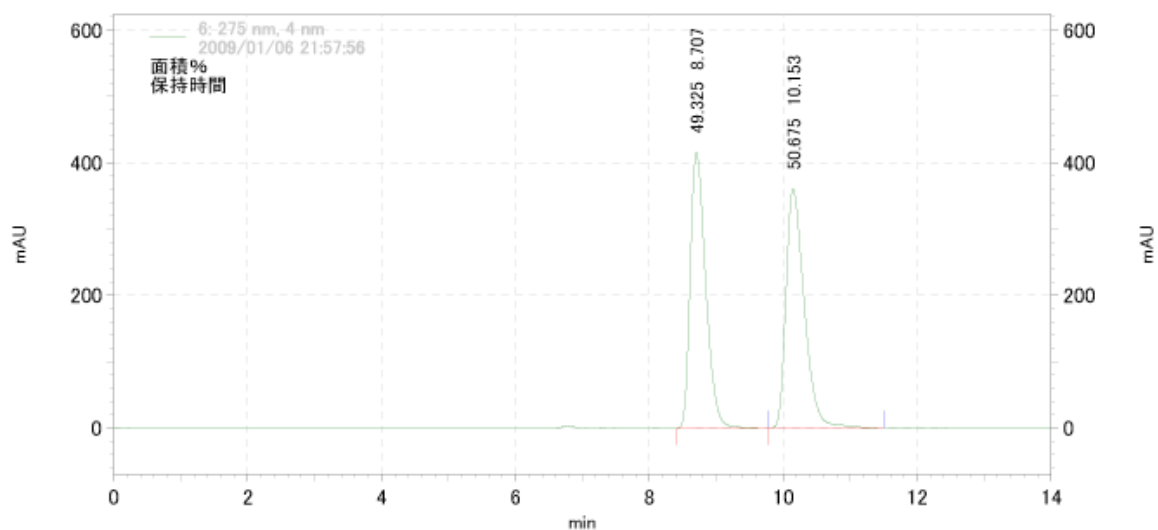

6: 275 nm, 4 nm結果

| Peak # | Name | Retention Time | Area     | Area %  | Wavelength |
|--------|------|----------------|----------|---------|------------|
| 1      |      | 8.71           | 26645406 | 49.325  | IV         |
| 2      |      | 10.15          | 27374251 | 50.675  | VI         |
| Total  |      |                | 54019657 | 100.000 |            |

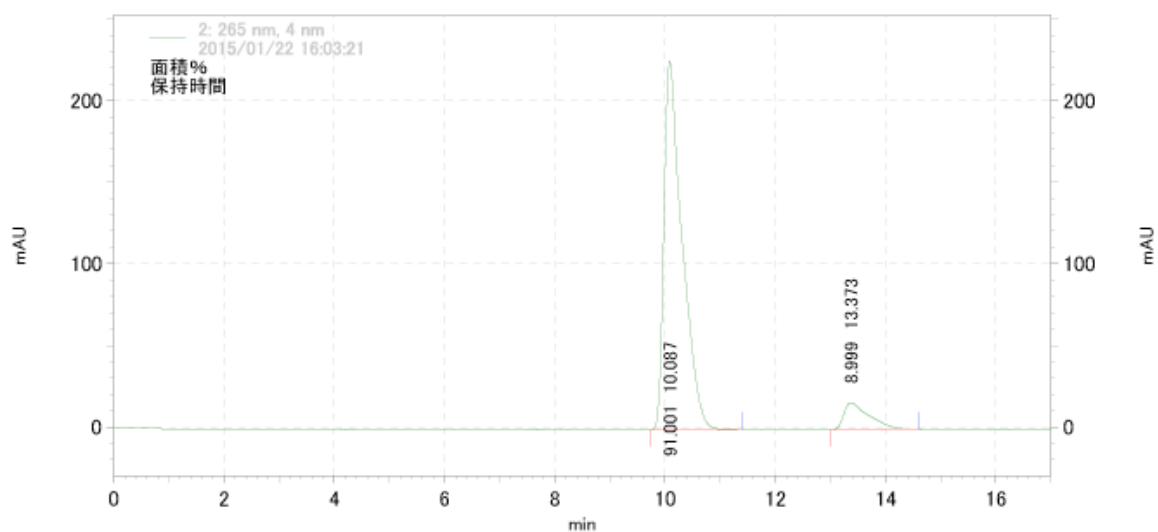

2: 265 nm, 4 nm結果

| Peak # | Name | Retention Time | Area     | Area %  | Wavelength |
|--------|------|----------------|----------|---------|------------|
| 1      |      | 10.09          | 20650078 | 91.001  | II         |
| 2      |      | 13.37          | 2042084  | 8.999   | II         |
| Total  |      |                | 22692162 | 100.000 |            |

**Figure S-57.** The charts of chiral HPLC analyses of racemic **3i** (upper), and the hydrogenation product obtained from entry 8 of Table 2 (lower).

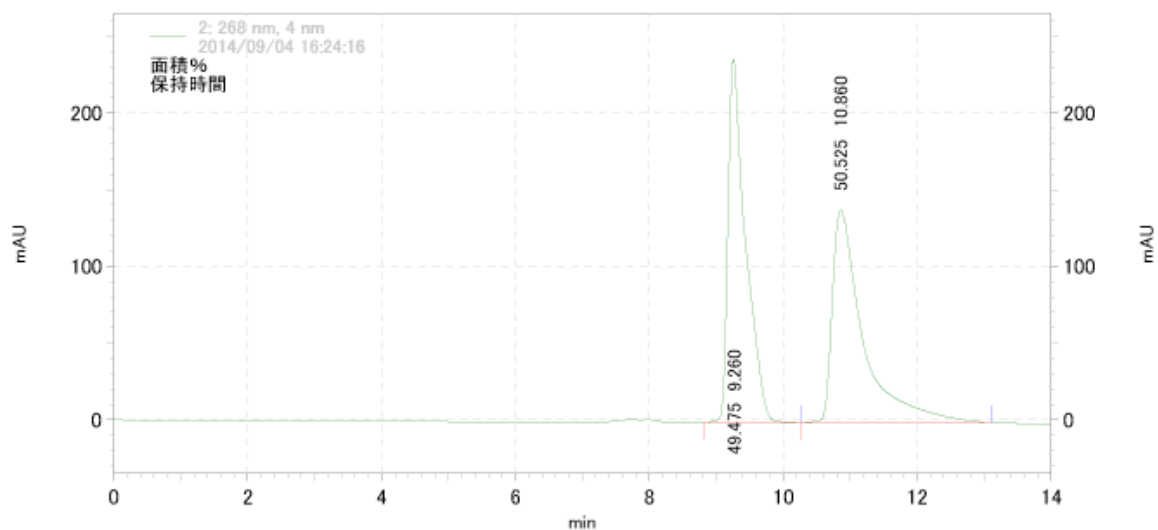

2: 268 nm, 4 nm結果

| Pk # | 名前 | 保持時間  | 面積       | 面積%     | ピークコード |
|------|----|-------|----------|---------|--------|
| 1    |    | 9.26  | 17349178 | 49.475  | IB     |
| 2    |    | 10.86 | 17717466 | 50.525  | BI     |
| トータル |    |       | 35066644 | 100.000 |        |

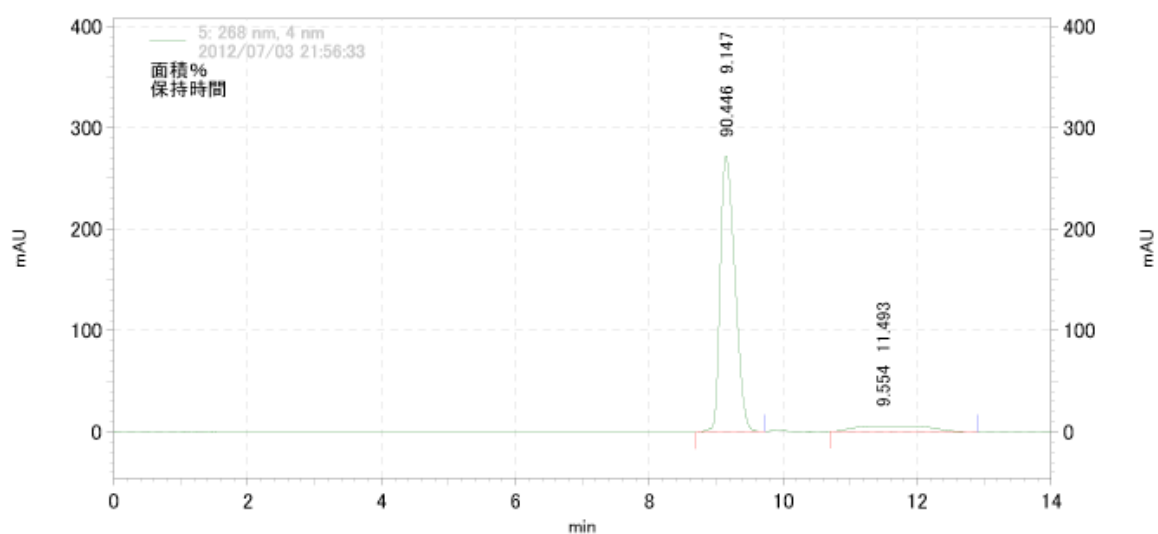

5: 268 nm, 4 nm結果

| Pk # | 名前 | 保持時間  | 面積       | 面積%     | ピークコード |
|------|----|-------|----------|---------|--------|
| 1    |    | 9.15  | 16568319 | 90.446  | BB     |
| 2    |    | 11.49 | 1750214  | 9.554   | II     |
| トータル |    |       | 18318533 | 100.000 |        |

**Figure S-58.** The charts of chiral HPLC analyses of racemic **3j** (upper), and the hydrogenation product obtained from entry 1 of Table 3 (lower).

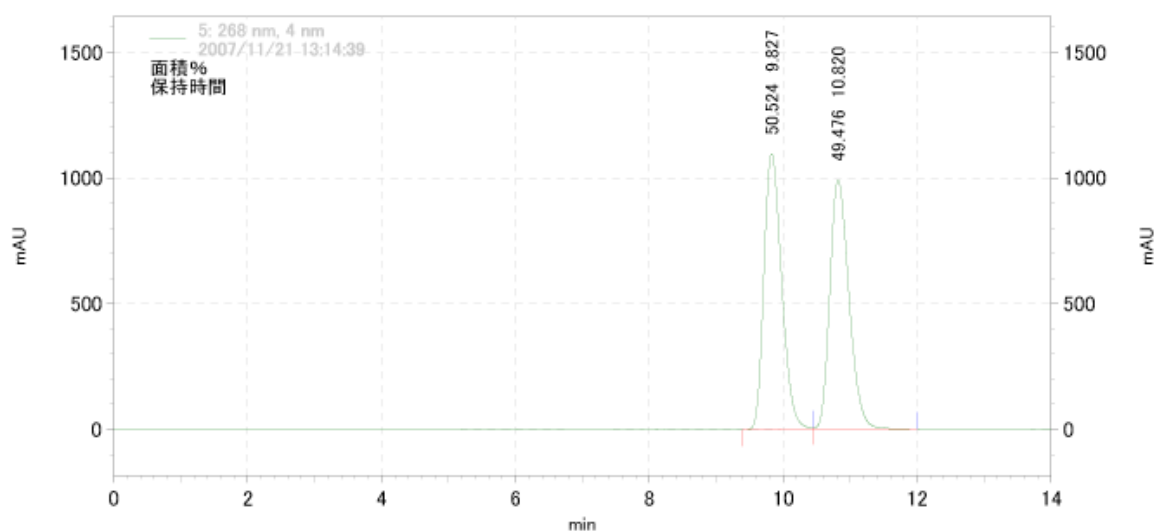

5: 268 nm, 4 nm結果

| Pk # | 名前 | 保持時間  | 面積        | 面積%     | ヘーラインコード |
|------|----|-------|-----------|---------|----------|
| 1    |    | 9.83  | 80492623  | 50.524  | BV       |
| 2    |    | 10.82 | 78823984  | 49.476  | VI       |
| トータル |    |       | 159316607 | 100.000 |          |

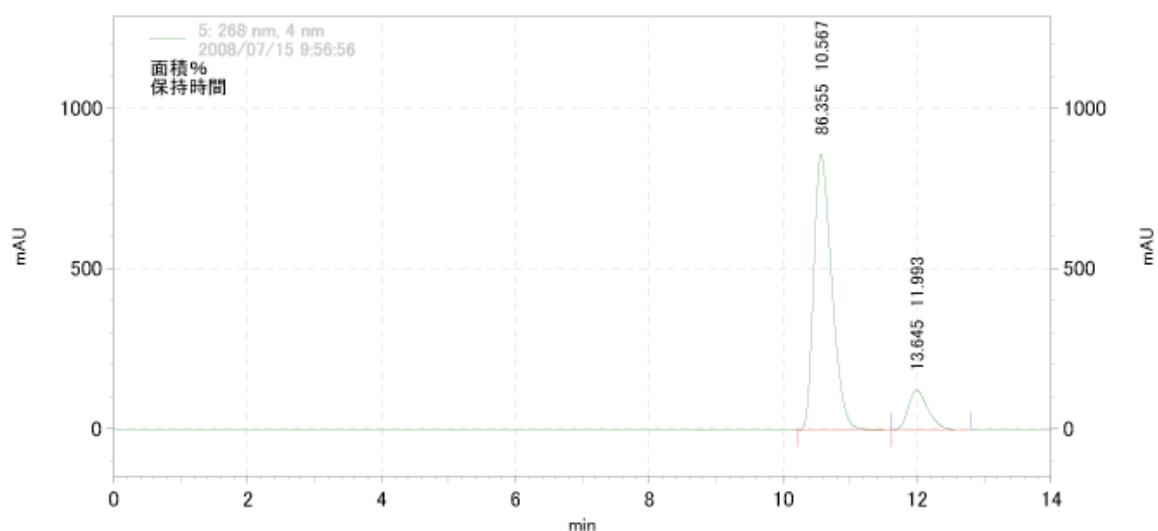

5: 268 nm, 4 nm結果

| Pk # | 名前 | 保持時間  | 面積       | 面積%     | ヘーラインコード |
|------|----|-------|----------|---------|----------|
| 1    |    | 10.57 | 64248045 | 86.355  | IV       |
| 2    |    | 11.99 | 10152289 | 13.645  | VI       |
| トータル |    |       | 74400334 | 100.000 |          |

**Figure S-59.** The charts of chiral HPLC analyses of racemic **3k** (upper), and the hydrogenation product obtained from entry 2 of Table 3 (lower).



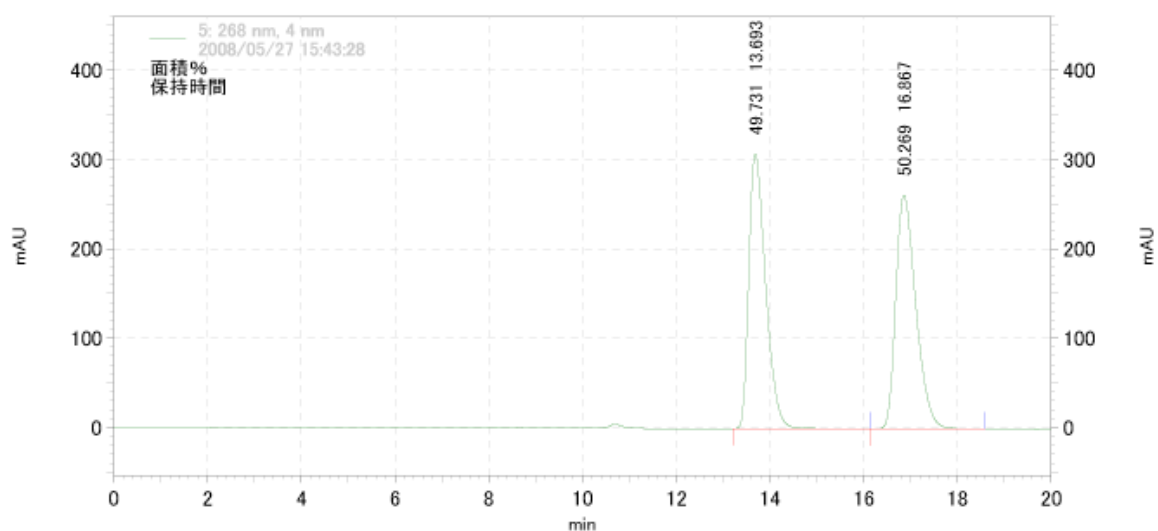

| 5: 268 nm, 4 nm結果 |      |    |       |          |           |
|-------------------|------|----|-------|----------|-----------|
| 面積%               | 保持時間 | 名前 | 面積    | 面積%      | ヘーラインコード  |
|                   |      | 1  | 13.69 | 30681829 | 49.731 IB |
|                   |      | 2  | 16.87 | 31013505 | 50.269 BI |
| トータル              |      |    |       | 61695334 | 100.000   |

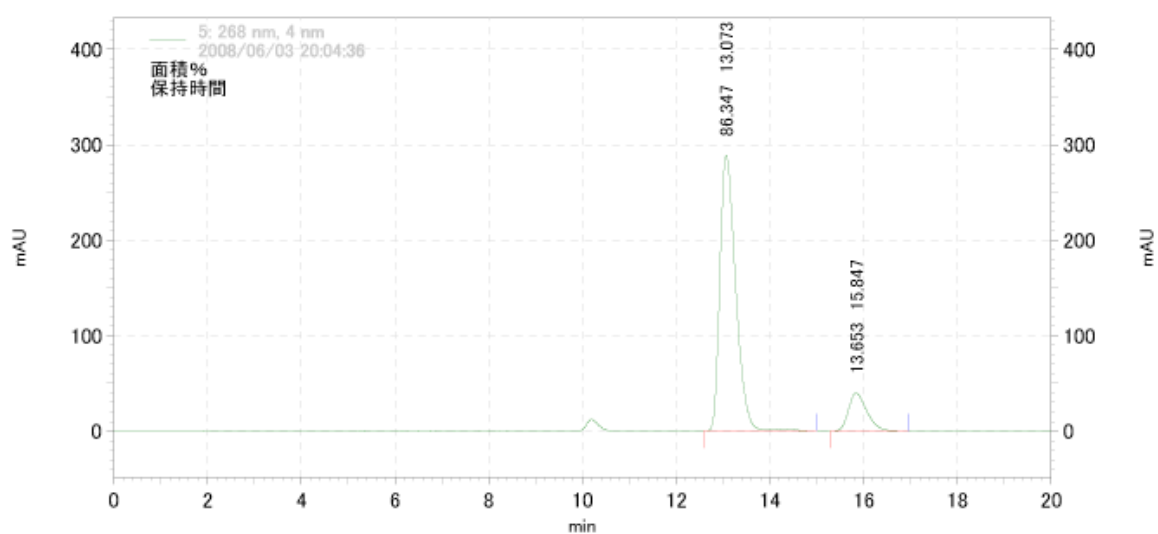

| 5: 268 nm, 4 nm結果 |      |    |       |          |           |
|-------------------|------|----|-------|----------|-----------|
| 面積%               | 保持時間 | 名前 | 面積    | 面積%      | ヘーラインコード  |
|                   |      | 1  | 13.07 | 27030671 | 86.347 MM |
|                   |      | 2  | 15.85 | 4273967  | 13.653 BB |
| トータル              |      |    |       | 31304638 | 100.000   |

**Figure S-60.** The charts of chiral HPLC analyses of racemic **31** (upper), and the hydrogenation product obtained from entry 3 of Table 3 (lower).

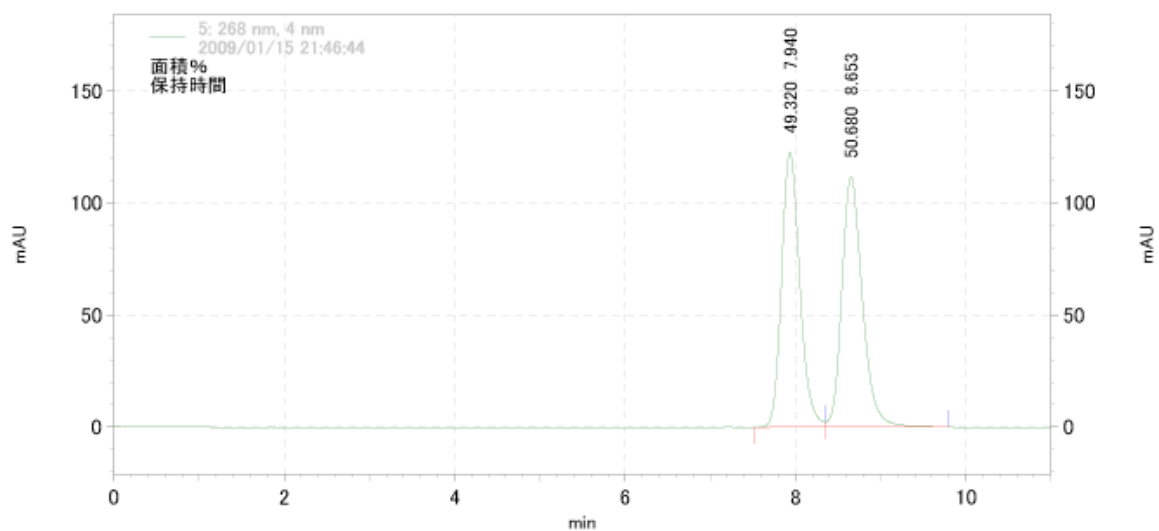

5: 268 nm, 4 nm結果

| Pk # | 名前 | 保持時間 | 面積       | 面積%     | ヘーラインコート |
|------|----|------|----------|---------|----------|
| 1    |    | 7.94 | 7276983  | 49.320  | BV       |
| 2    |    | 8.65 | 7477571  | 50.680  | VI       |
| トータル |    |      | 14754554 | 100.000 |          |

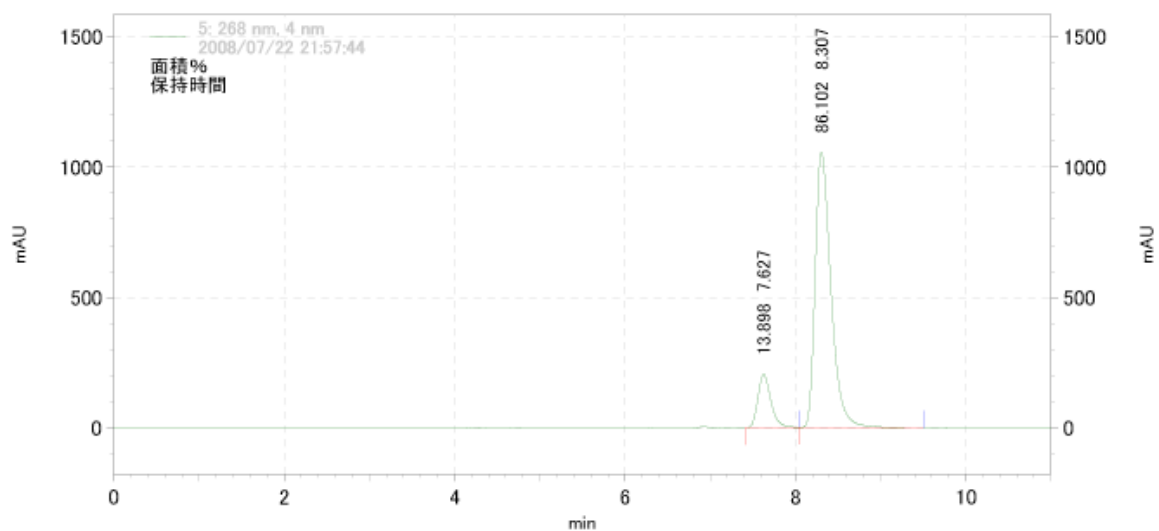

5: 268 nm, 4 nm結果

| Pk # | 名前 | 保持時間 | 面積       | 面積%     | ヘーラインコート |
|------|----|------|----------|---------|----------|
| 1    |    | 7.63 | 8811196  | 13.898  | IV       |
| 2    |    | 8.31 | 54588509 | 86.102  | VI       |
| トータル |    |      | 63399705 | 100.000 |          |

**Figure S-61.** The charts of chiral HPLC analyses of racemic **3m** (upper), and the hydrogenation product obtained from entry 4 of Table 3 (lower).

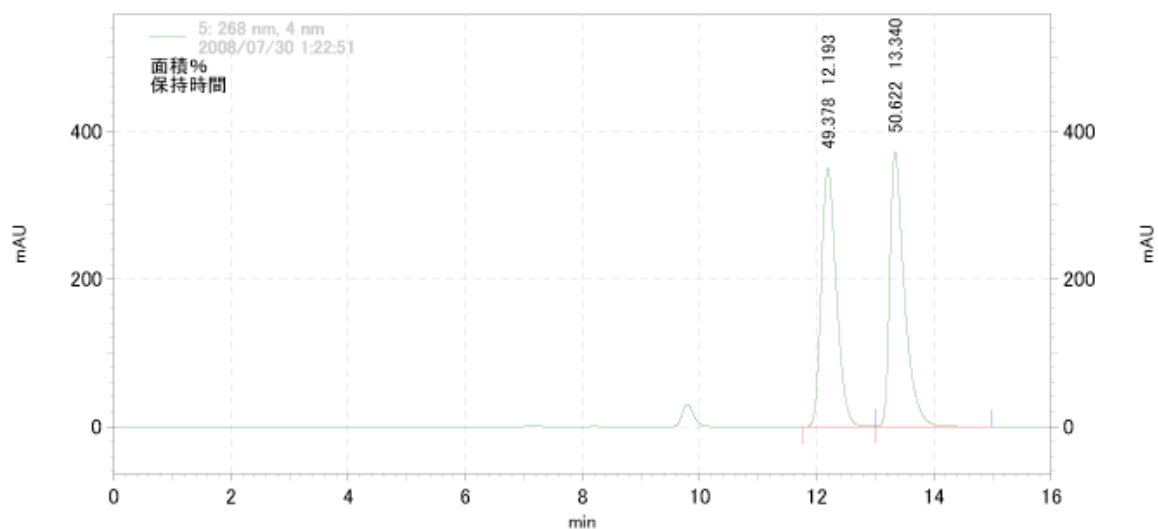

| 5: 268 nm, 4 nm結果 | 名前 | 保持時間  | 面積       | 面積%     | ヘーラインコート |
|-------------------|----|-------|----------|---------|----------|
| Pk #              |    |       |          |         |          |
| 1                 |    | 12.19 | 25114105 | 49.378  | BV       |
| 2                 |    | 13.34 | 25746373 | 50.622  | VI       |
| トータル              |    |       | 50860478 | 100.000 |          |

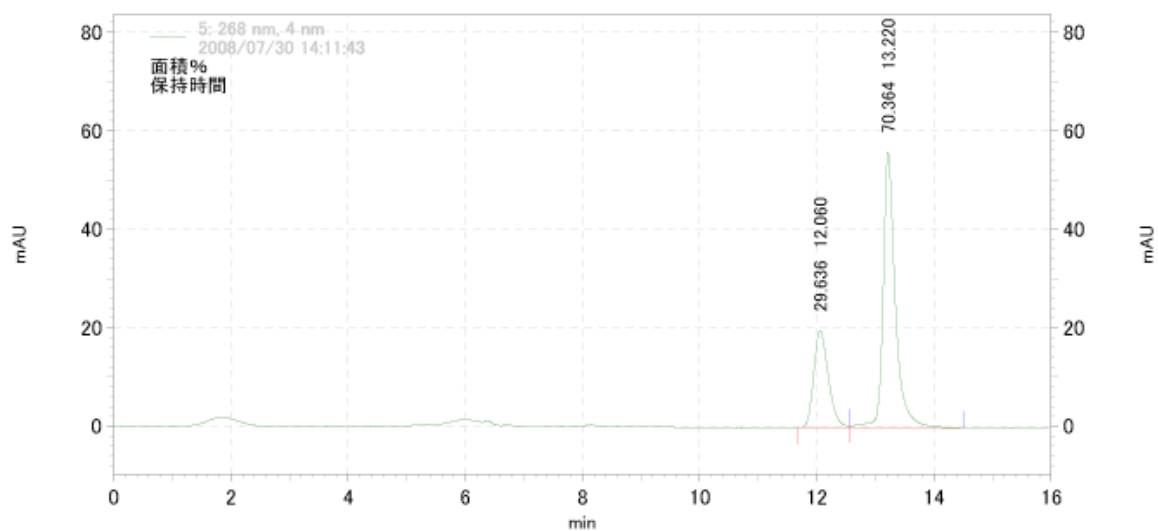

| 5: 268 nm, 4 nm結果 | 名前 | 保持時間  | 面積      | 面積%     | ヘーラインコート |
|-------------------|----|-------|---------|---------|----------|
| Pk #              |    |       |         |         |          |
| 1                 |    | 12.06 | 1364090 | 29.636  | BV       |
| 2                 |    | 13.22 | 3238790 | 70.364  | VI       |
| トータル              |    |       | 4602880 | 100.000 |          |

**Figure S-62.** The charts of chiral HPLC analyses of racemic **3n** (upper), and the hydrogenation product obtained from entry 5 of Table 3 (lower).

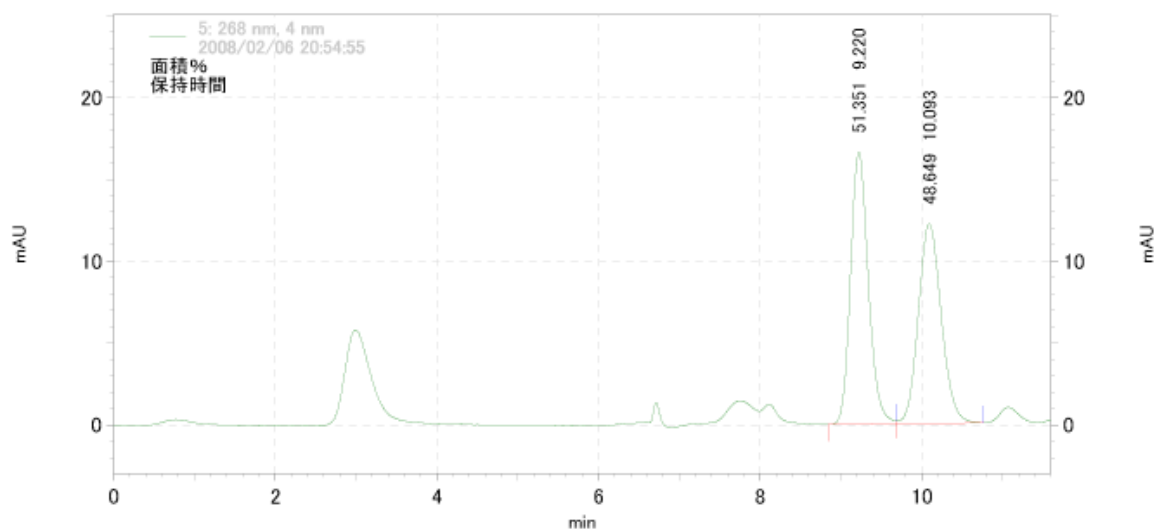

5: 268 nm, 4 nm結果

| Pk # | 名前 | 保持時間  | 面積      | 面積%     | ピークコード |
|------|----|-------|---------|---------|--------|
| 1    |    | 9.22  | 1017277 | 51.351  | BV     |
| 2    |    | 10.09 | 963732  | 48.649  | VB     |
| トータル |    |       | 1981009 | 100.000 |        |

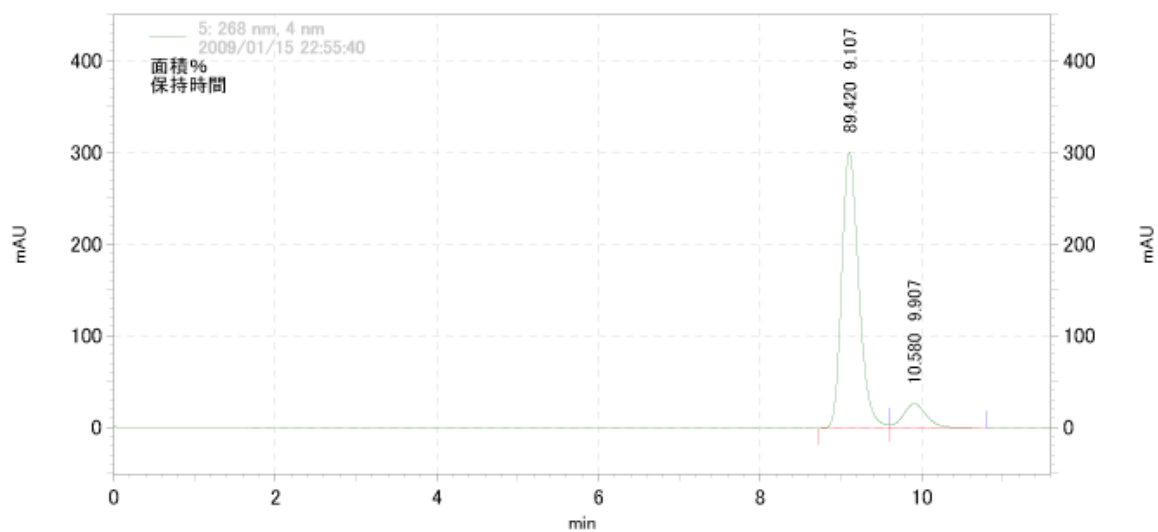

5: 268 nm, 4 nm結果

| Pk # | 名前 | 保持時間 | 面積       | 面積%     | ピークコード |
|------|----|------|----------|---------|--------|
| 1    |    | 9.11 | 17620304 | 89.420  | BV     |
| 2    |    | 9.91 | 2084862  | 10.580  | VI     |
| トータル |    |      | 19705166 | 100.000 |        |

**Figure S-63.** The charts of chiral HPLC analyses of racemic **3o** (upper), and the hydrogenation product obtained from entry 7 of Table 3 (lower).

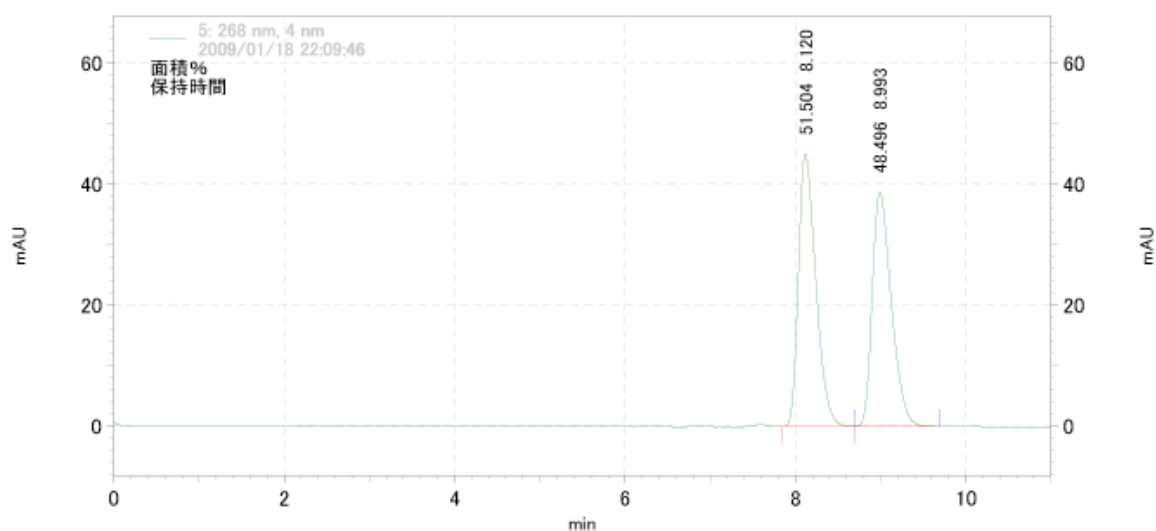

| 5: 268 nm, 4 nm結果 | 名前 | 保持時間 | 面積      | 面積%     | ヘーラインコード |
|-------------------|----|------|---------|---------|----------|
| Pk #              |    |      |         |         |          |
| 1                 |    | 8.12 | 2562804 | 51.504  | BV       |
| 2                 |    | 8.99 | 2413087 | 48.496  | VB       |
| トータル              |    |      | 4975891 | 100.000 |          |

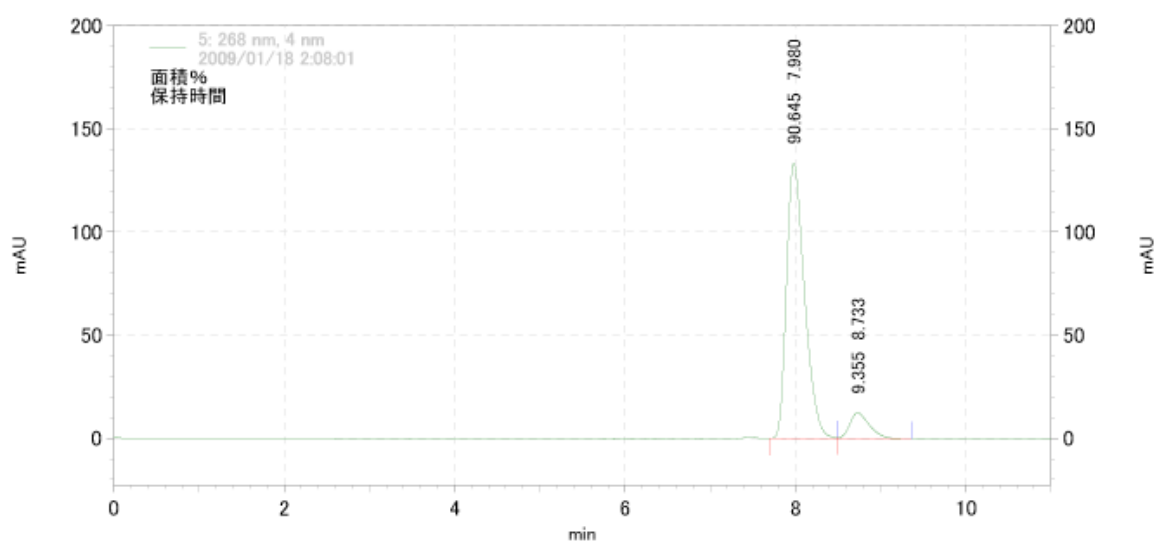

| 5: 268 nm, 4 nm結果 | 名前 | 保持時間 | 面積      | 面積%     | ヘーラインコード |
|-------------------|----|------|---------|---------|----------|
| Pk #              |    |      |         |         |          |
| 1                 |    | 7.98 | 7835205 | 90.645  | BV       |
| 2                 |    | 8.73 | 808669  | 9.355   | VB       |
| トータル              |    |      | 8643874 | 100.000 |          |

**Figure S-64.** The charts of chiral HPLC analyses of racemic **3p** (upper), and the hydrogenation product obtained from entry 8 of Table 3 (lower).

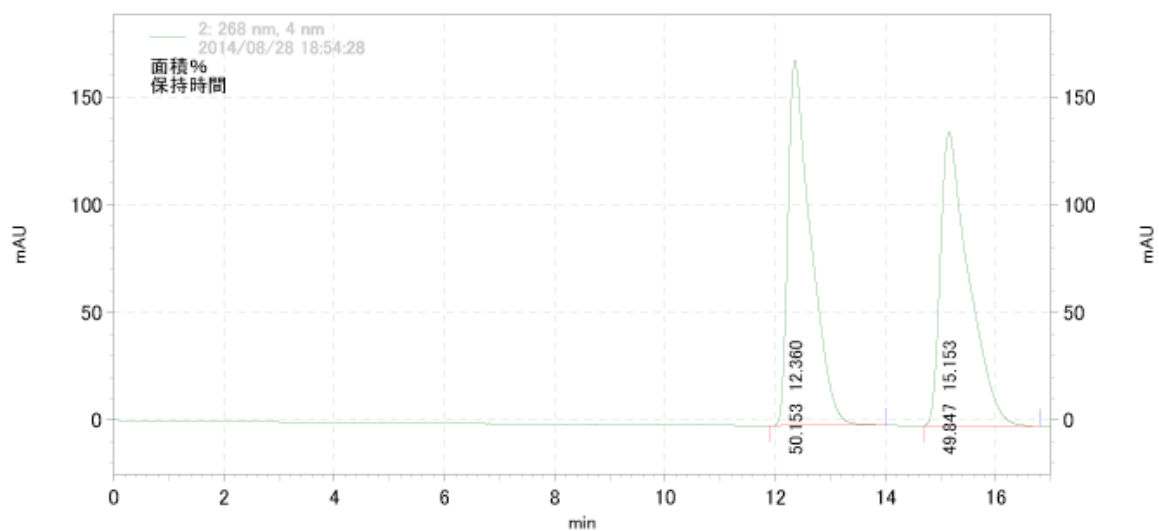

2: 268 nm, 4 nm結果

| Pk # | 名前 | 保持時間  | 面積       | 面積%     | ヘーラインコード |
|------|----|-------|----------|---------|----------|
| 1    |    | 12.36 | 19527263 | 50.153  | BI       |
| 2    |    | 15.15 | 19408411 | 49.847  | II       |
| トータル |    |       | 38935674 | 100.000 |          |

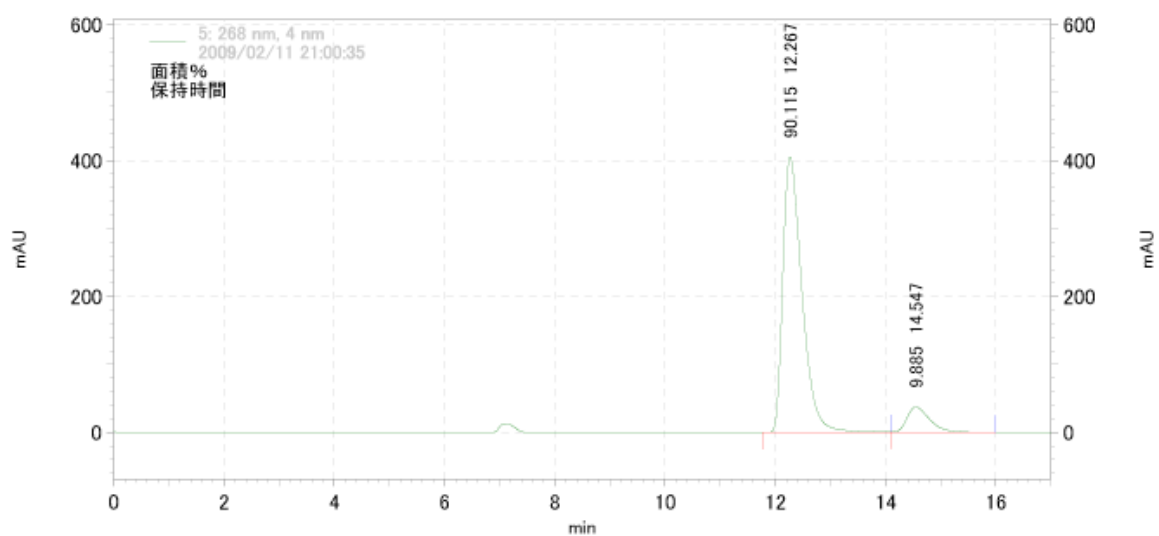

5: 268 nm, 4 nm結果

| Pk # | 名前 | 保持時間  | 面積       | 面積%     | ヘーラインコード |
|------|----|-------|----------|---------|----------|
| 1    |    | 12.27 | 39248156 | 90.115  | BV       |
| 2    |    | 14.55 | 4305492  | 9.885   | VI       |
| トータル |    |       | 43553648 | 100.000 |          |

**Figure S-65.** The charts of chiral HPLC analyses of racemic **3q** (upper), and the product obtained from the deprotection of **3j** in eq 2 (lower).

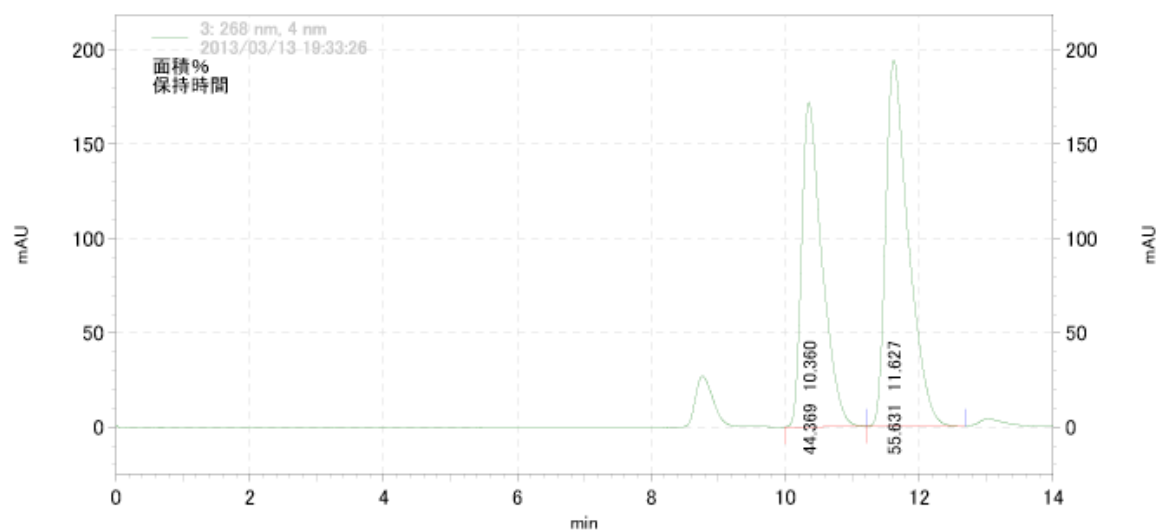

| 3: 268 nm, 4 nm結果 |    |       |          |         |          |
|-------------------|----|-------|----------|---------|----------|
| Pk #              | 名前 | 保持時間  | 面積       | 面積%     | ヘーラインコート |
| 1                 |    | 10.36 | 14586973 | 44.369  | IV       |
| 2                 |    | 11.63 | 18289526 | 55.631  | VB       |
| トータル              |    |       | 32876499 | 100.000 |          |

**Figure S-66.** The charts of chiral HPLC analyses of **3k**, which was obtained from the hydrogenation of **5k** in eq 3.

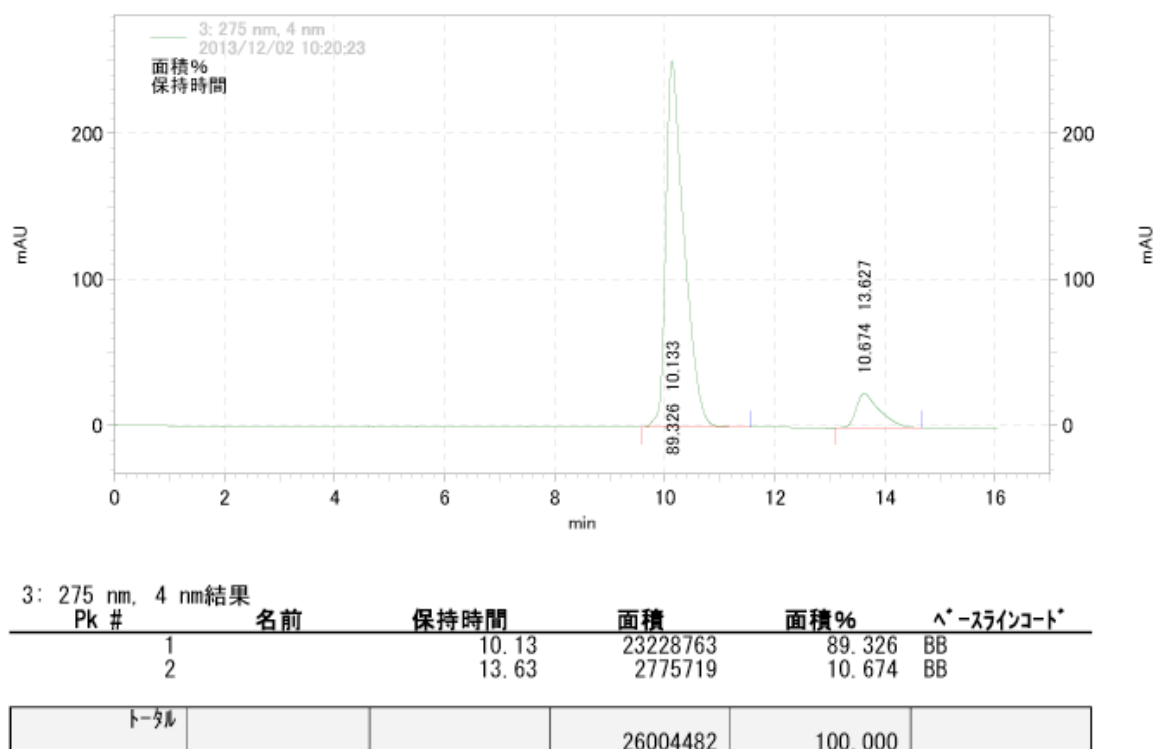

**Figure S-67.** The charts of chiral HPLC analyses of **3i-d**, which obtained from the deuteration of **2i** in eq 4.

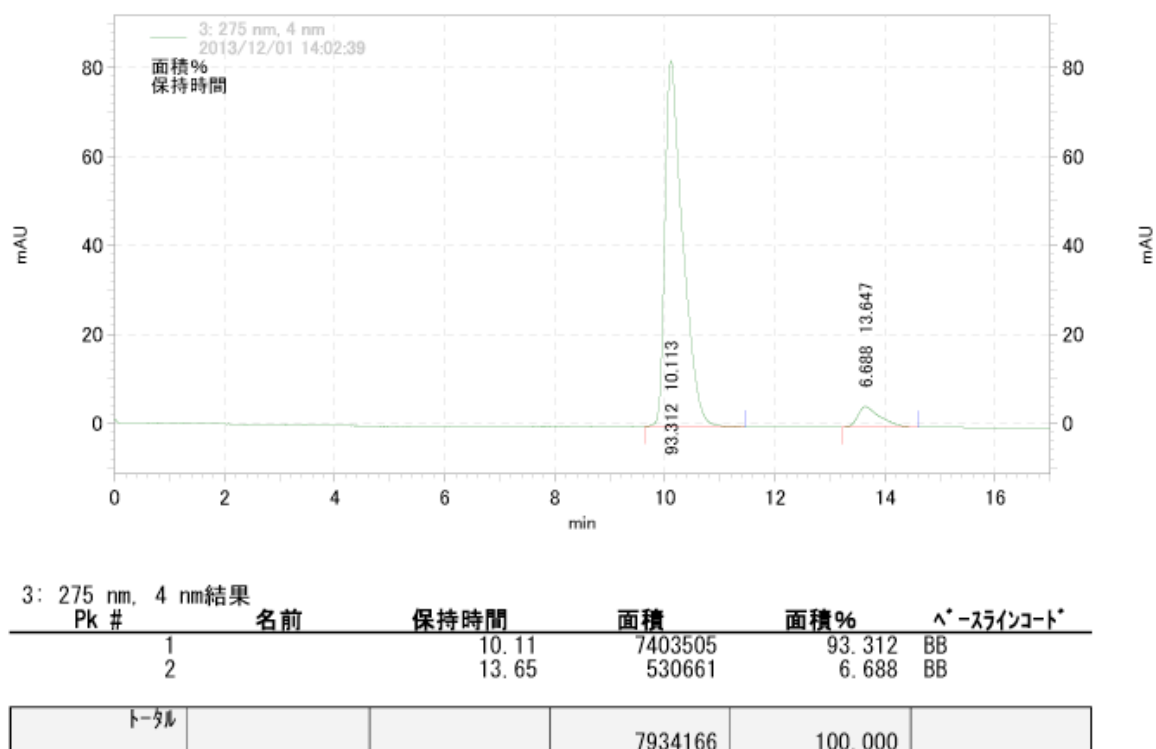

**Figure S-68.** The charts of chiral HPLC analyses of **3i**, which obtained from the hydrogenation of **2i** under 1.0 MPa of H<sub>2</sub>.
